# Supplementary material for: Synthesis and Evaluation of Antimicrobial and Cytotoxic Activity of Oxathiine-Fused Quinone-Thioglucoside Conjugates of Substituted 1,4-Naphthoquinones
Source: PubMed Central journal article supplement (PMC7463537; doi:10.3390/molecules25163577), 2020-08-06

## Supplementary Materials

*for the paper*

**“Synthesis and evaluation of antimicrobial and cytotoxic activity of oxathiine fused quinone-thioglycoside conjugates of substituted 1,4-naphthoquinones”**

**Yuri E. Sabutski, Ekaterina S. Menchinskaya, Ludmila S. Shevchenko, Ekaterina A. Chingizova, Artur R. Chingizov, Roman S. Popov, Vladimir A. Denisenko, Valery V. Michailov, Dmitry L. Aminin, Sergey G. Polonik**

### Content

<sup>1</sup>H and <sup>13</sup>C NMR spectra for synthesized compounds

S2-S33

2-(2,3,4,6-Tetra-O-acetyl- $\beta$ -D-glucopyranosyl-1-thio)-3,5,8-trimethoxy-1,4-naphthoquinone (**13a**), ( $^1\text{H}$  NMR - 500 MHz,  $^{13}\text{C}$  NMR - 125 MHz, solvent -  $\text{CDCl}_3$ )

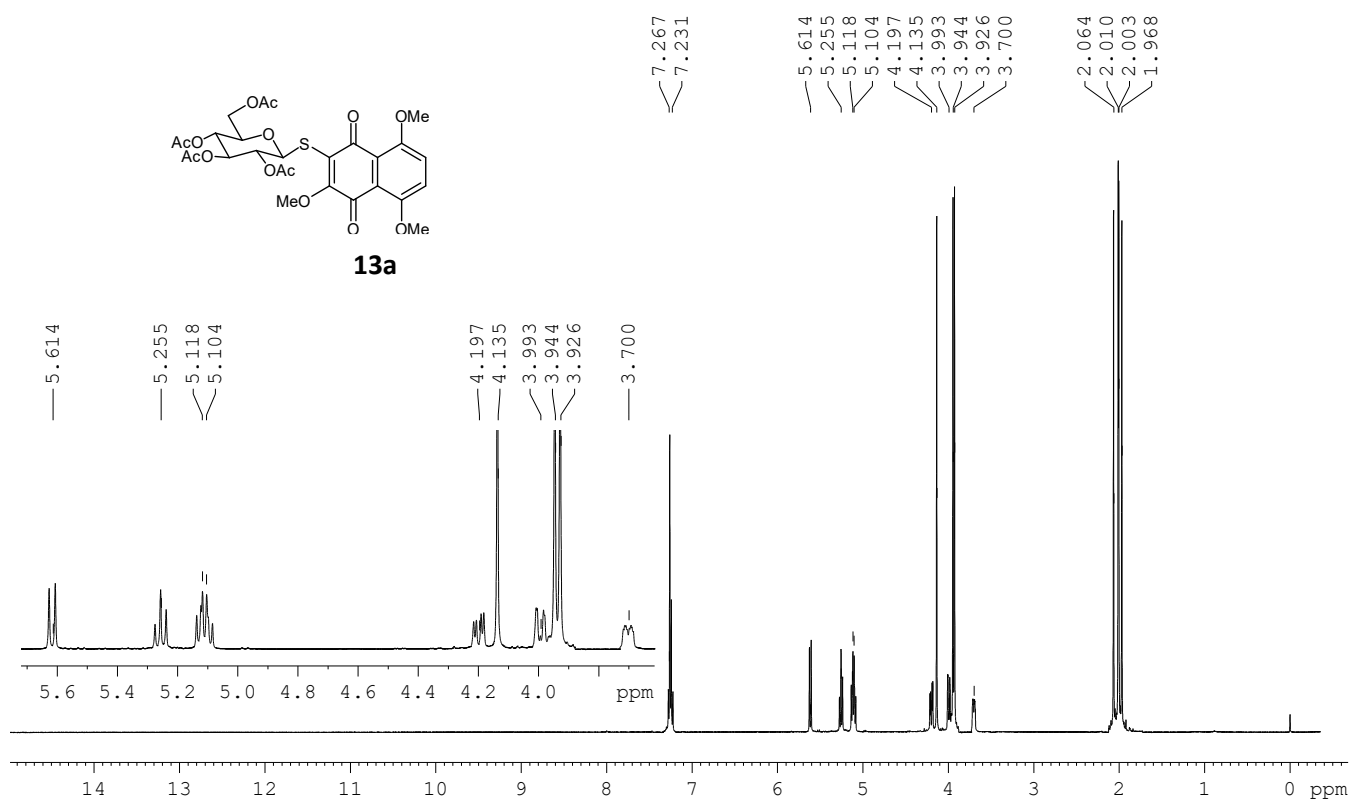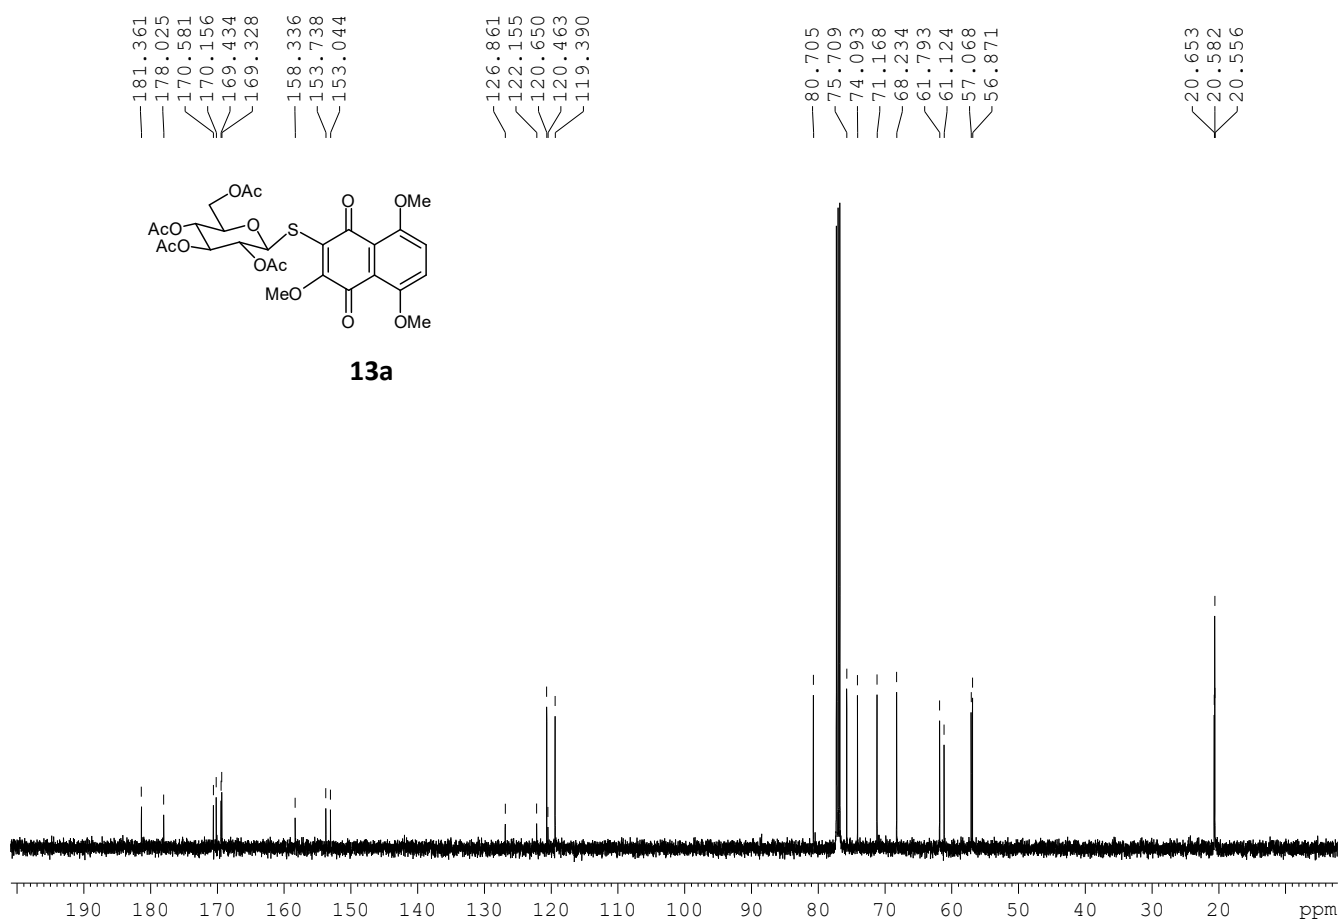

2-(2,3,4,6-Tetra-O-acetyl- $\beta$ -D-galactopyranosyl-1-thio)-3,5,8-trimethoxy-1,4-naphthoquinone (**13b**), ( $^1\text{H}$  NMR - 500 MHz,  $^{13}\text{C}$  NMR - 125 MHz, solvent -  $\text{CDCl}_3$ )

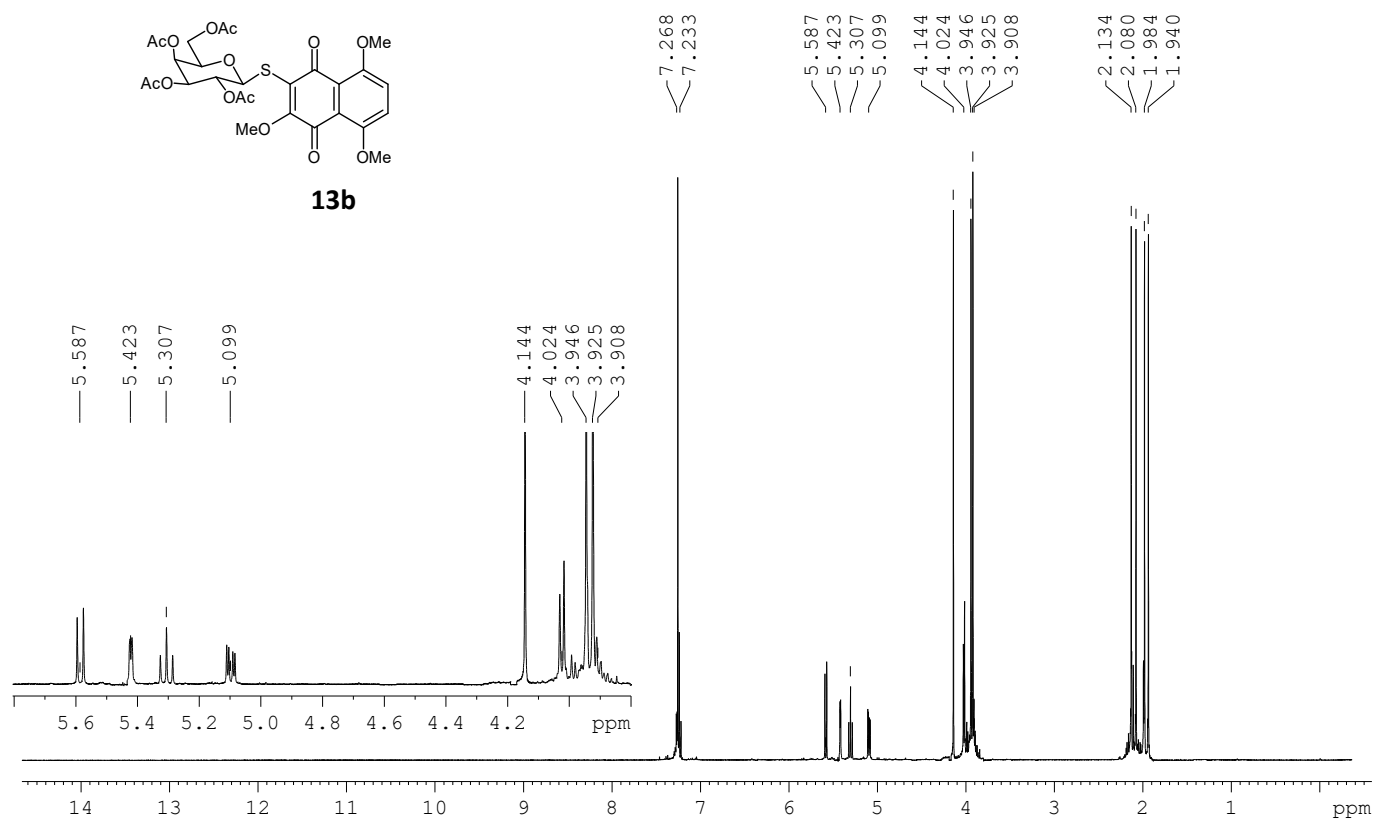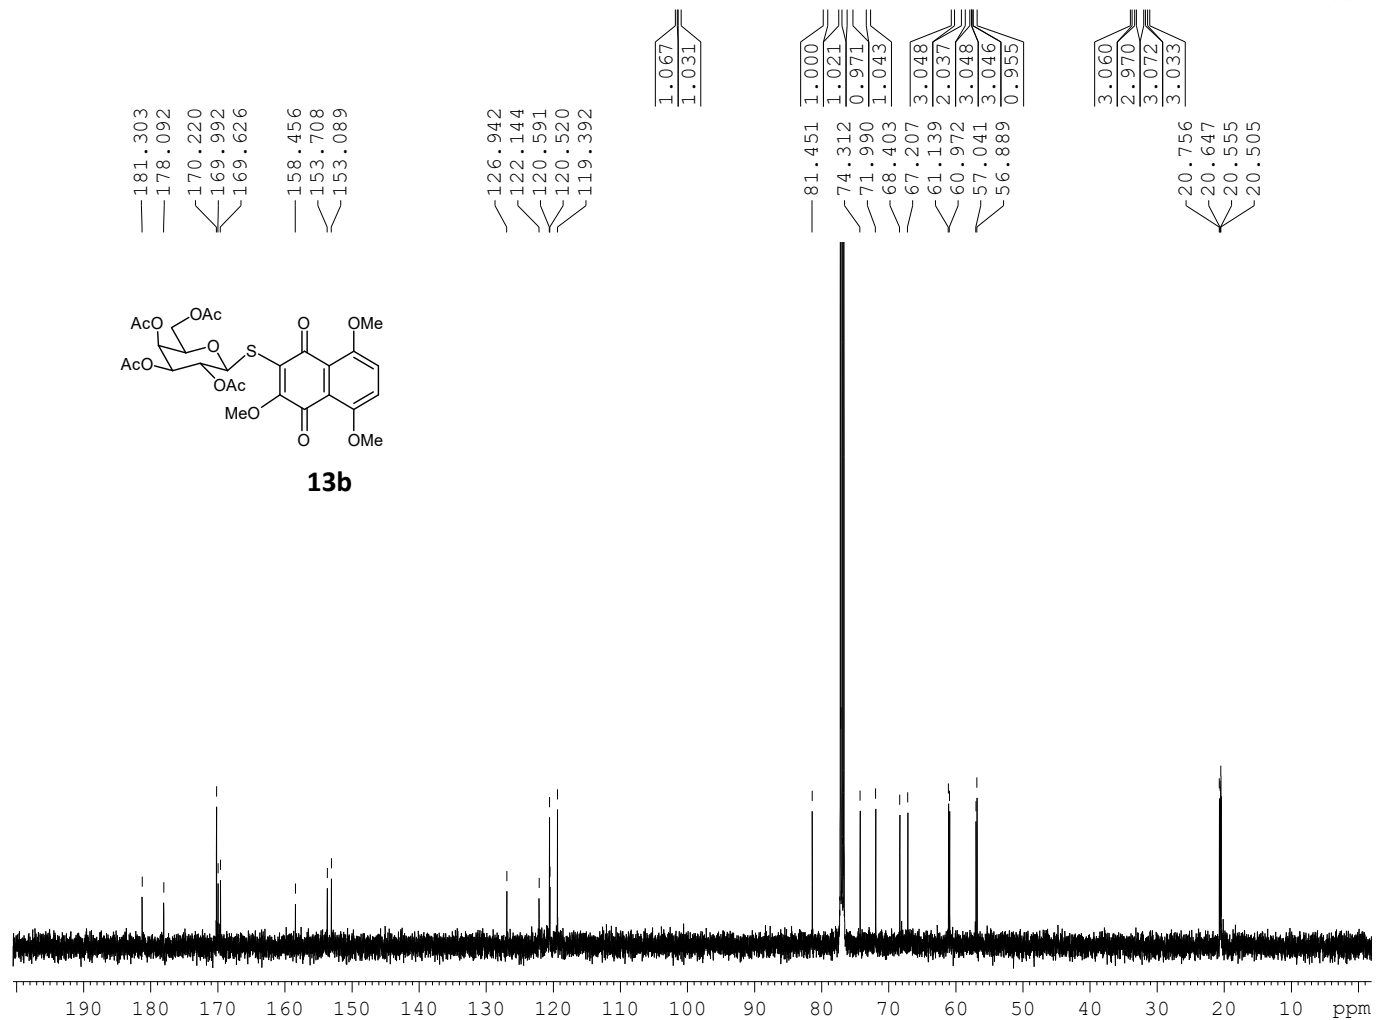

2-(2,3,4-Tri-O-acetyl- $\beta$ -D-xylopyranosyl-1-thio)-3,5,8-trimethoxy-1,4-naphthoquinone (**13c**), ( $^1\text{H}$  NMR - 500 MHz,  $^{13}\text{C}$  NMR - 125 MHz, solvent -  $\text{CDCl}_3$ )

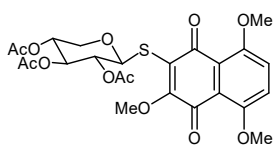

**13c**

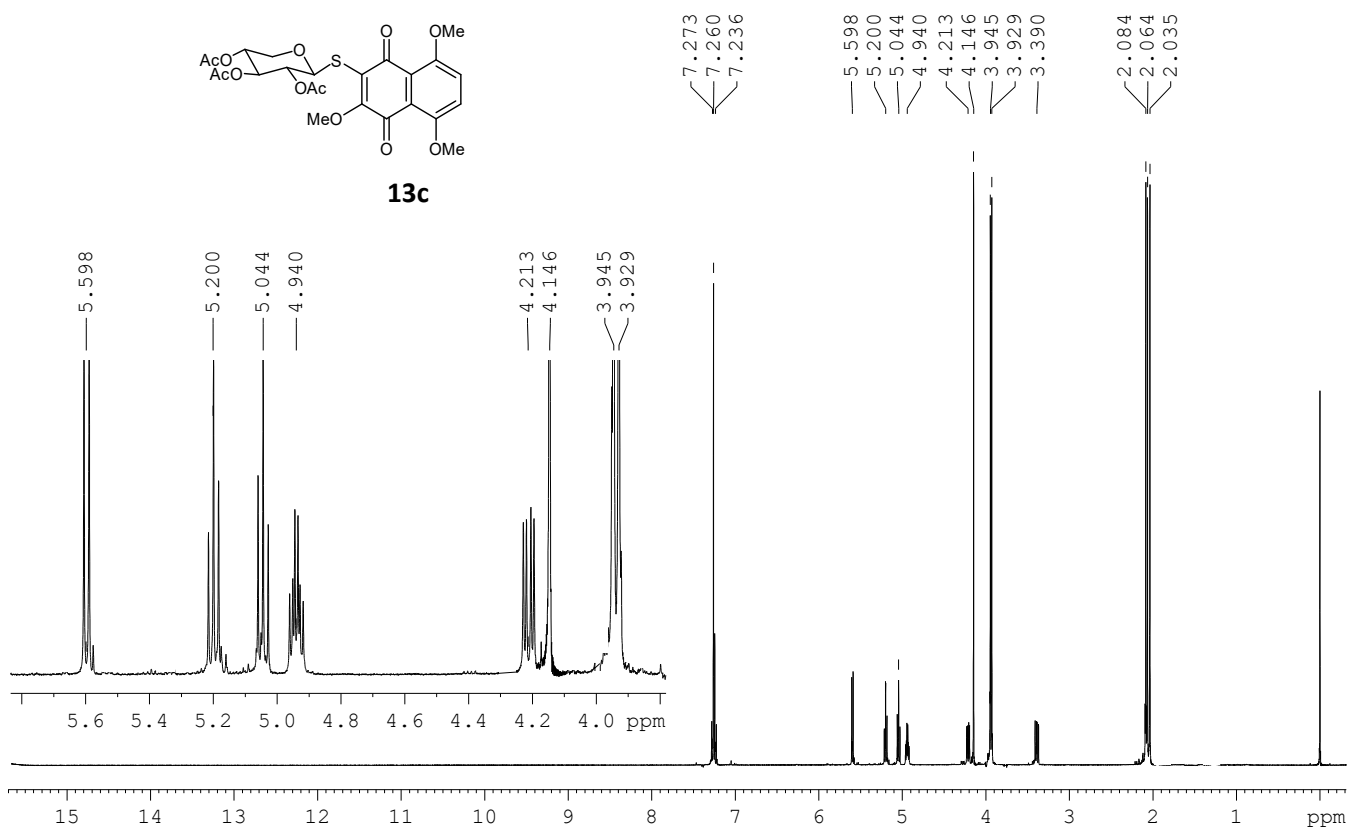

181.318  
178.342  
169.816  
169.747  
169.424  
159.429  
153.765  
153.316

126.590  
121.959  
120.790  
120.628  
119.440

81.647  
71.708  
70.606  
68.562  
64.850  
61.203  
57.133  
56.894

20.716

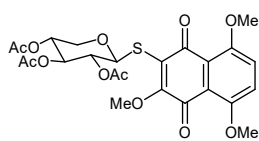

**13c**

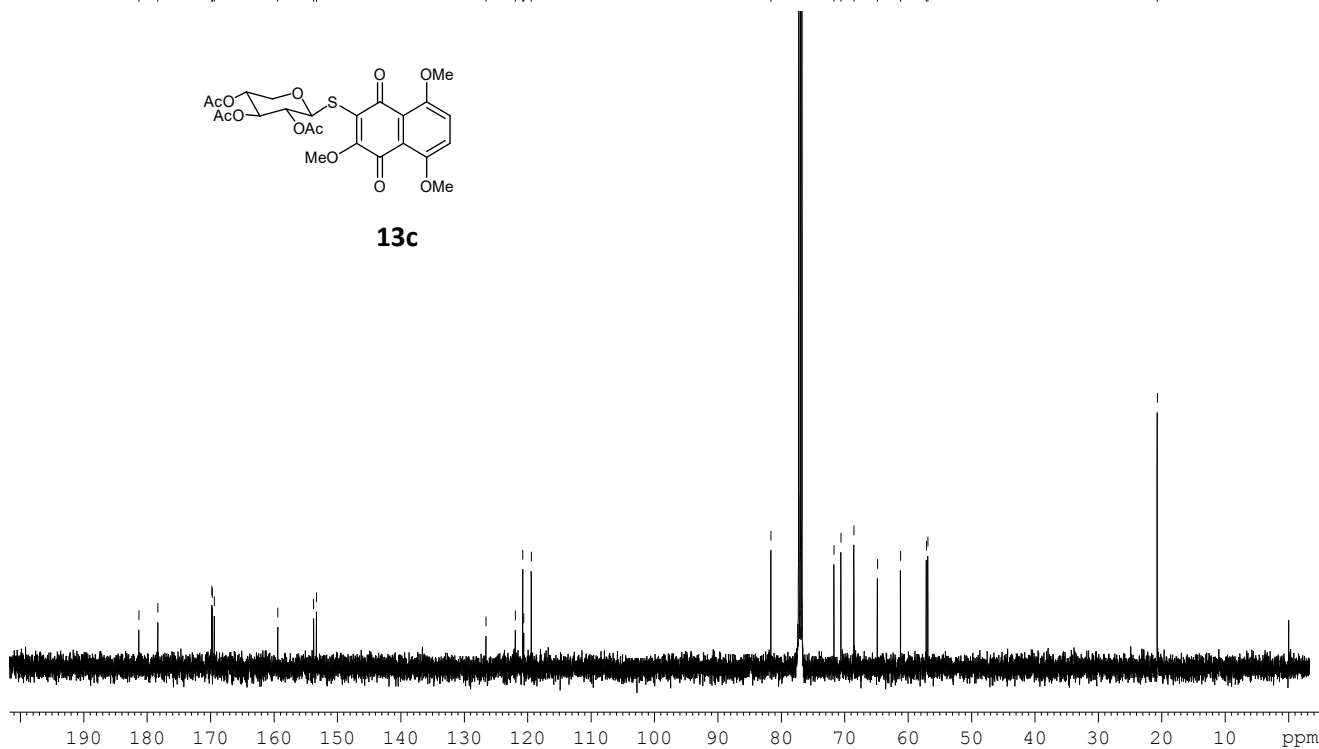

2-(2,3,4-Tri-O-acetyl- $\alpha$ -L-arabinopyranosyl-1-thio)-3,5,8-trimethoxy-1,4-naphthoquinone (**13d**), ( $^1\text{H}$  NMR - 500 MHz,  $^{13}\text{C}$  NMR - 125 MHz, solvent -  $\text{CDCl}_3$ )

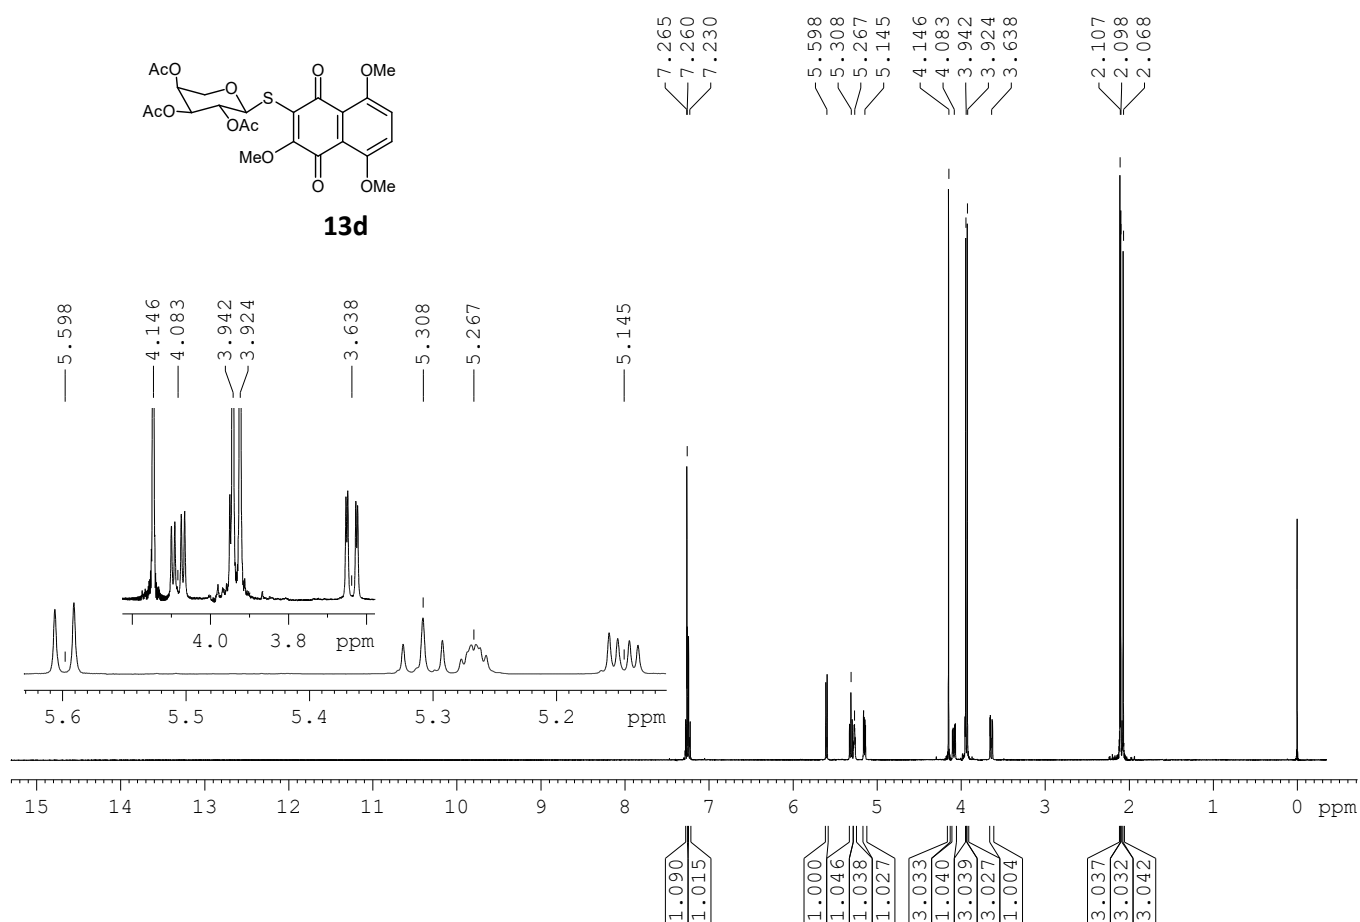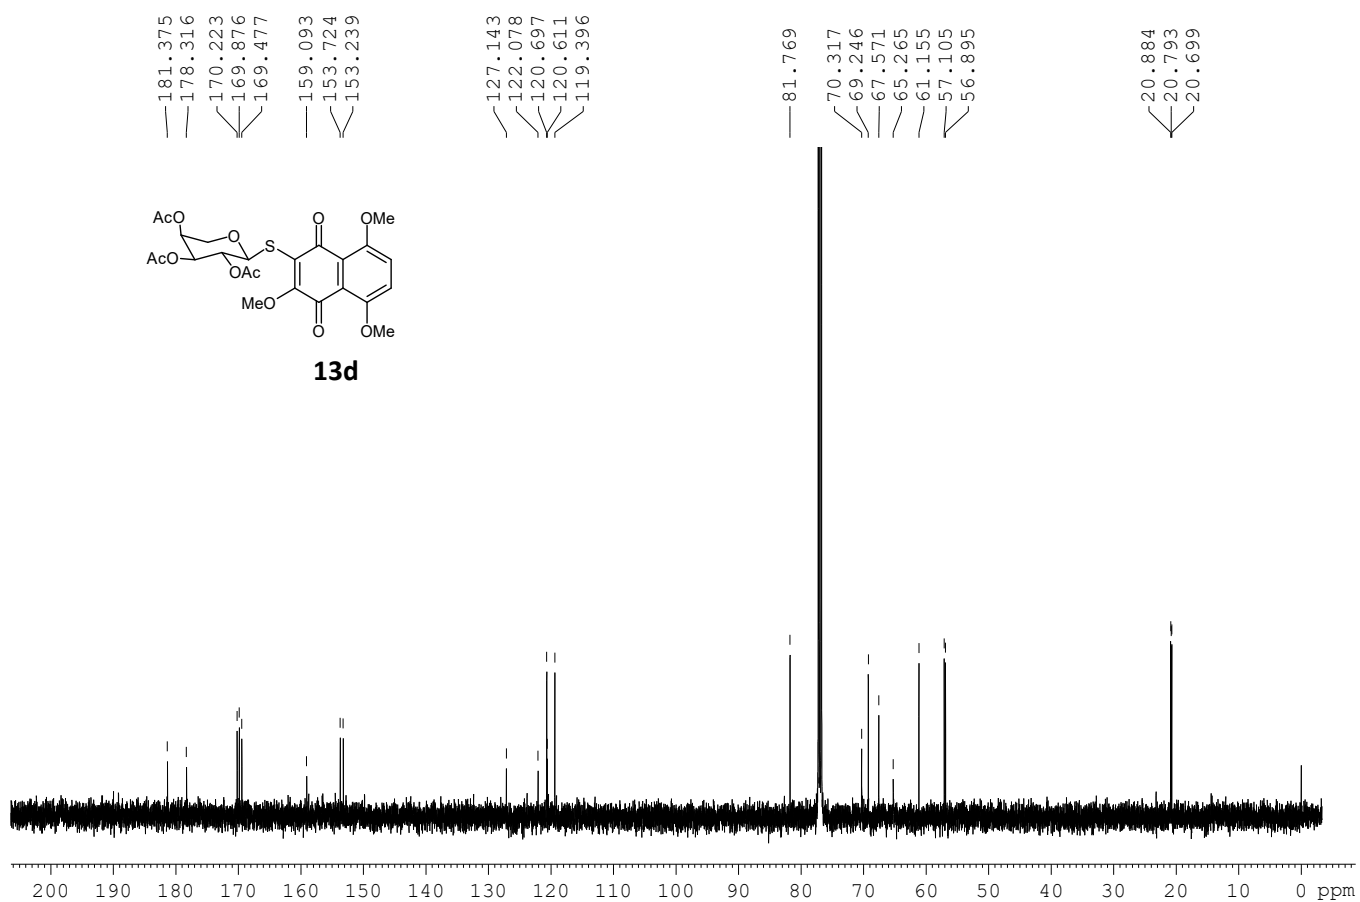

2-(2,3,4,6-Tetra-O-acetyl- $\beta$ -D-glucopyranosyl-1-thio)-6,7-dichloro-3,5,8-trimethoxy-1,4-naphthoquinone (**14a**), ( $^1\text{H}$  NMR - 500 MHz,  $^{13}\text{C}$  NMR - 125 MHz, solvent -  $\text{CDCl}_3$ )

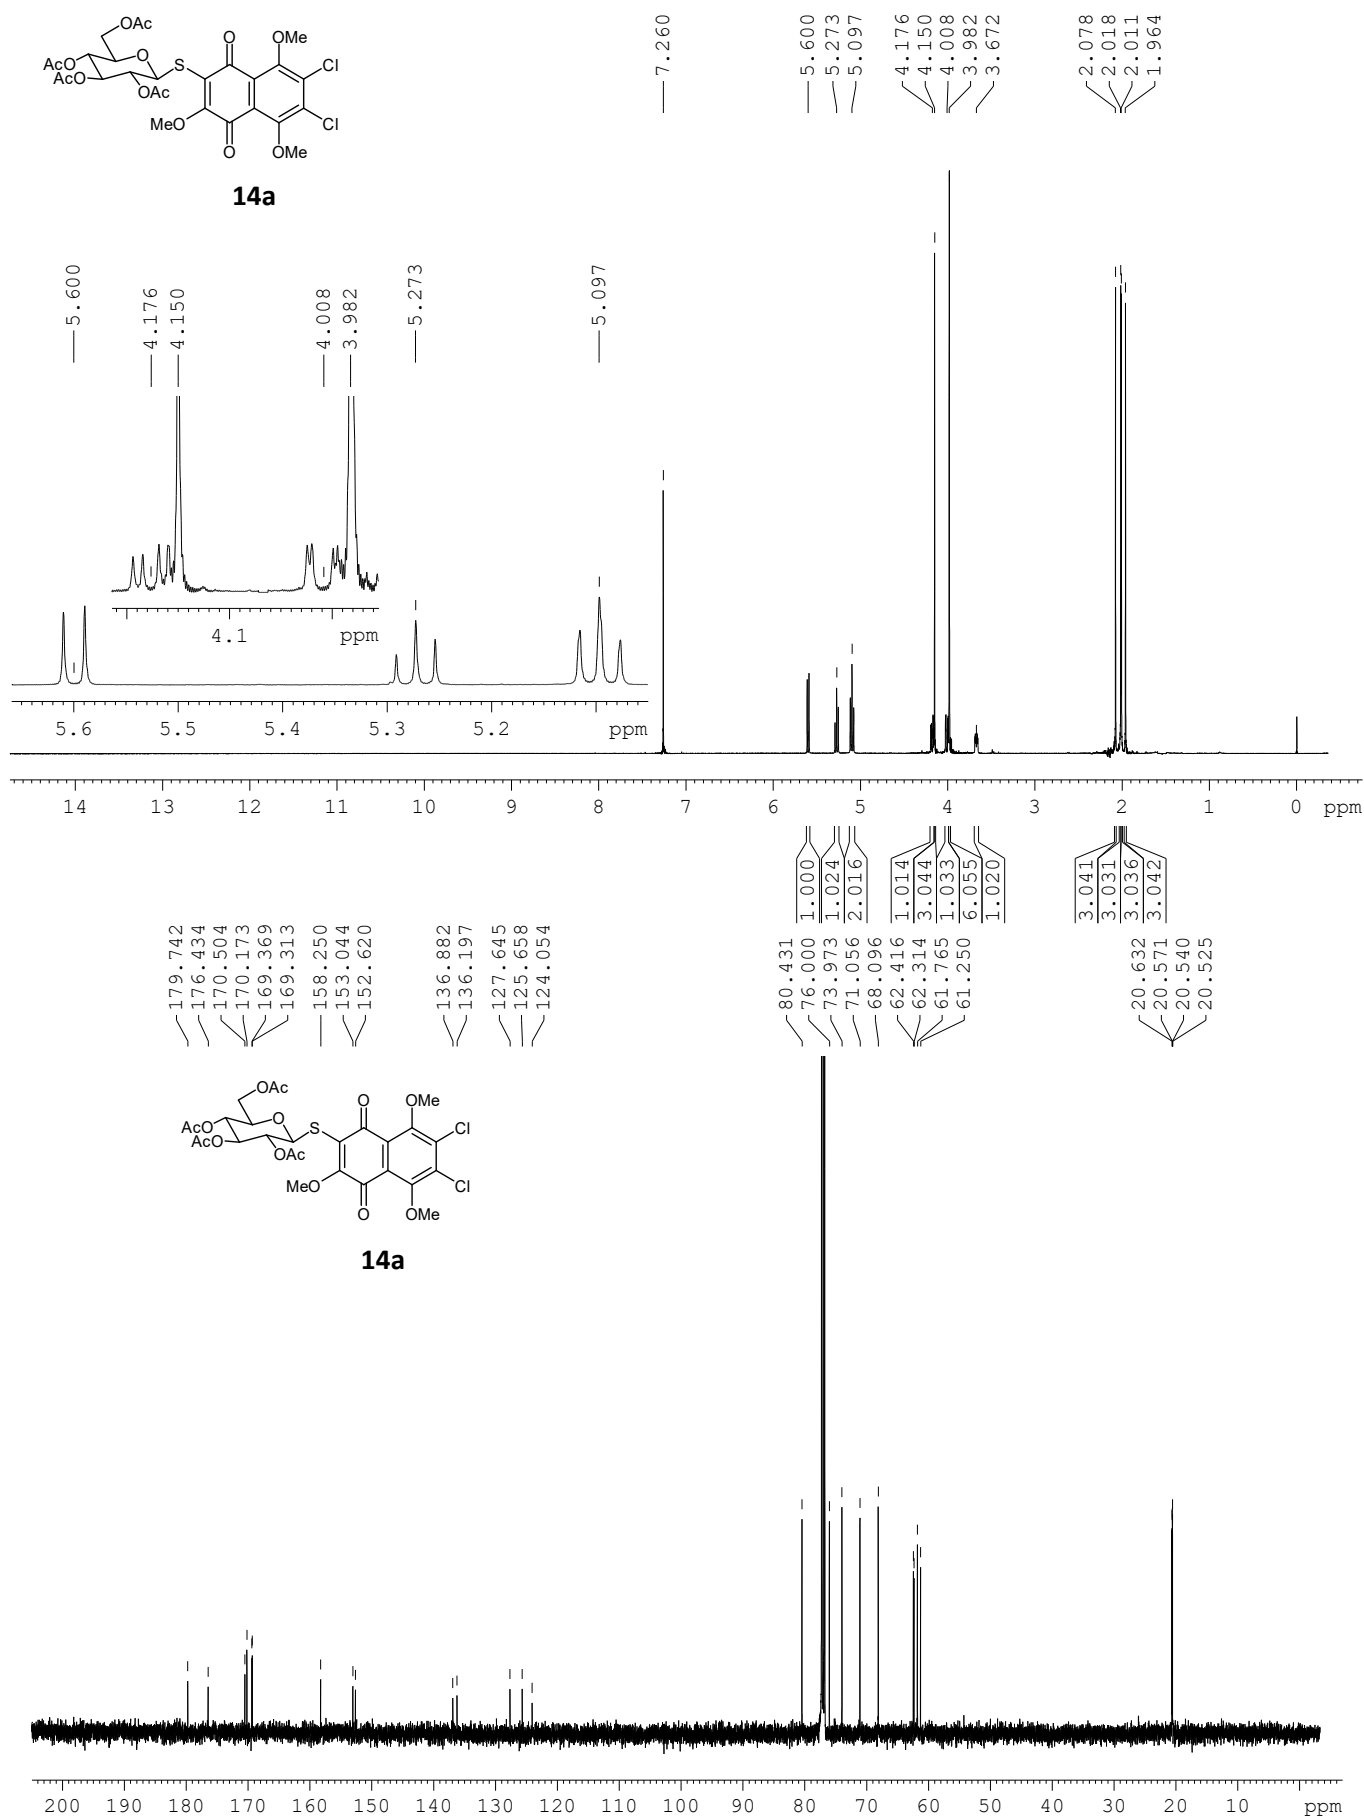

2-(2,3,4,6-Tetra-O-acetyl- $\beta$ -D-galactopyranosyl-1-thio)-6,7-dichloro-3,5,8-trimethoxy-1,4-naphthoquinone (**14b**), ( $^1\text{H}$  NMR - 500 MHz,  $^{13}\text{C}$  NMR - 125 MHz, solvent -  $\text{CDCl}_3$ )

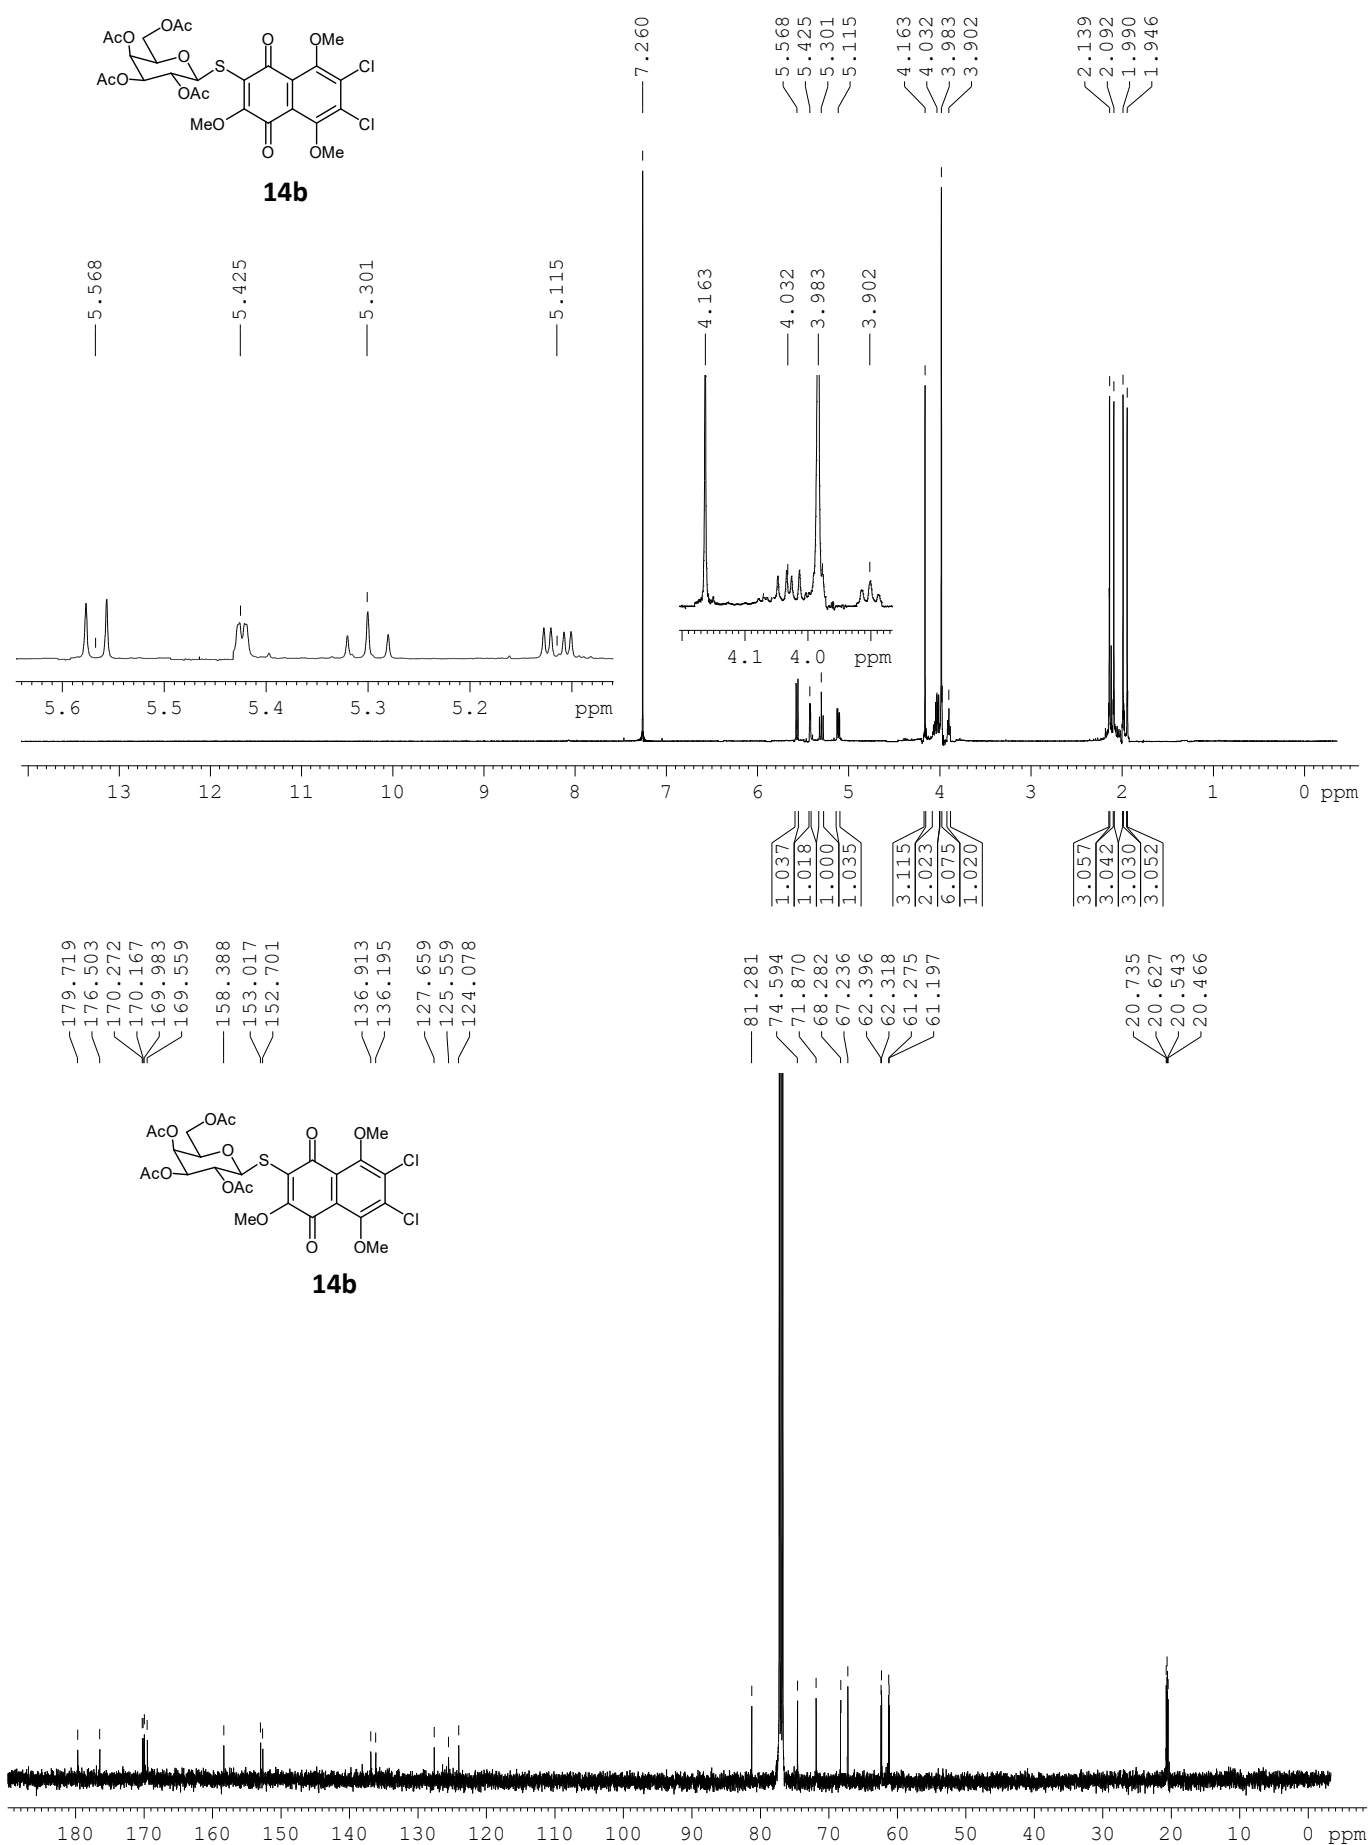

2-(2,3,4-Tri-O-acetyl- $\beta$ -D-xylopyranosyl-1-thio)-6,7-dichloro-3,5,8-trimethoxy-1,4-naphthoquinone (**14c**), ( $^1\text{H}$  NMR - 500 MHz,  $^{13}\text{C}$  NMR - 125 MHz, solvent -  $\text{CDCl}_3$ )

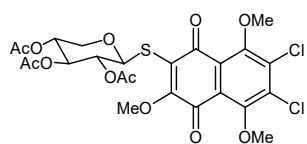

**14c**

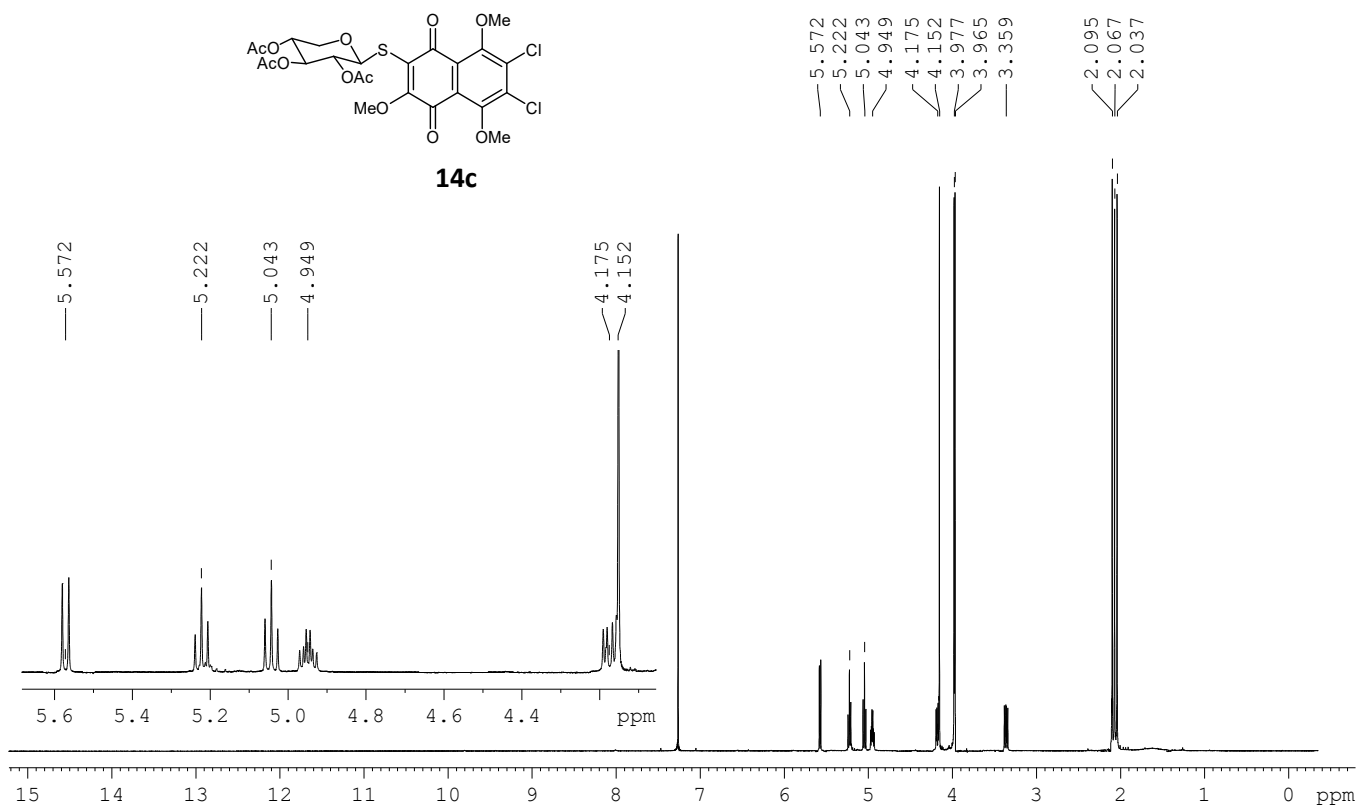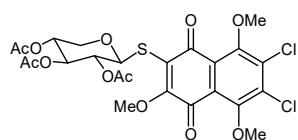

**14c**

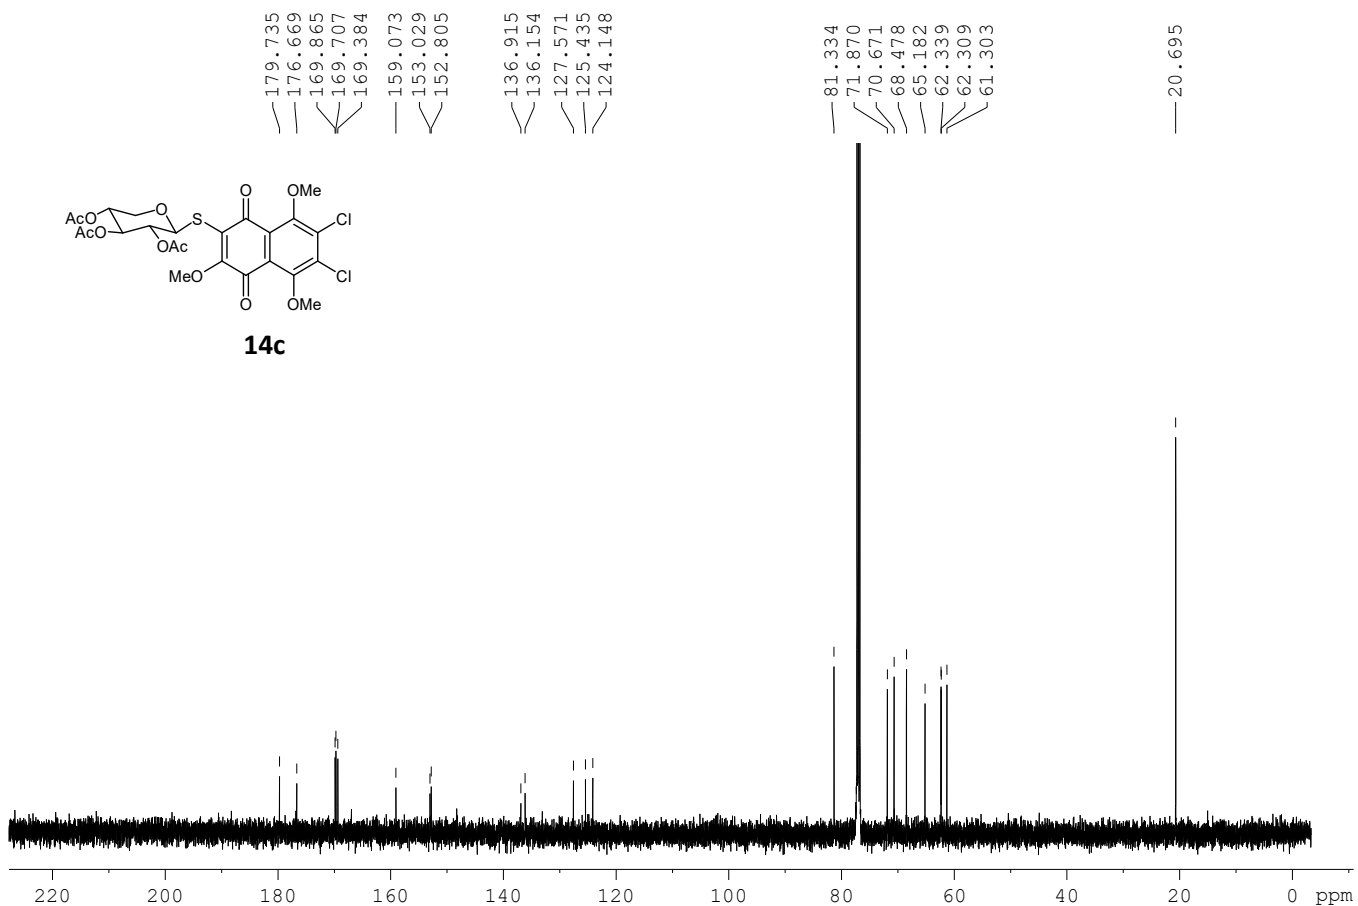



2-(2,3,4-Tri-O-acetyl- $\alpha$ -L-arabinopyranosyl-1-thio)-6,7-dichloro-3,5,8-trimethoxy-1,4-naphthoquinone (**14d**), ( $^1\text{H}$  NMR - 500 MHz,  $^{13}\text{C}$  NMR - 125 MHz, solvent -  $\text{CDCl}_3$ )

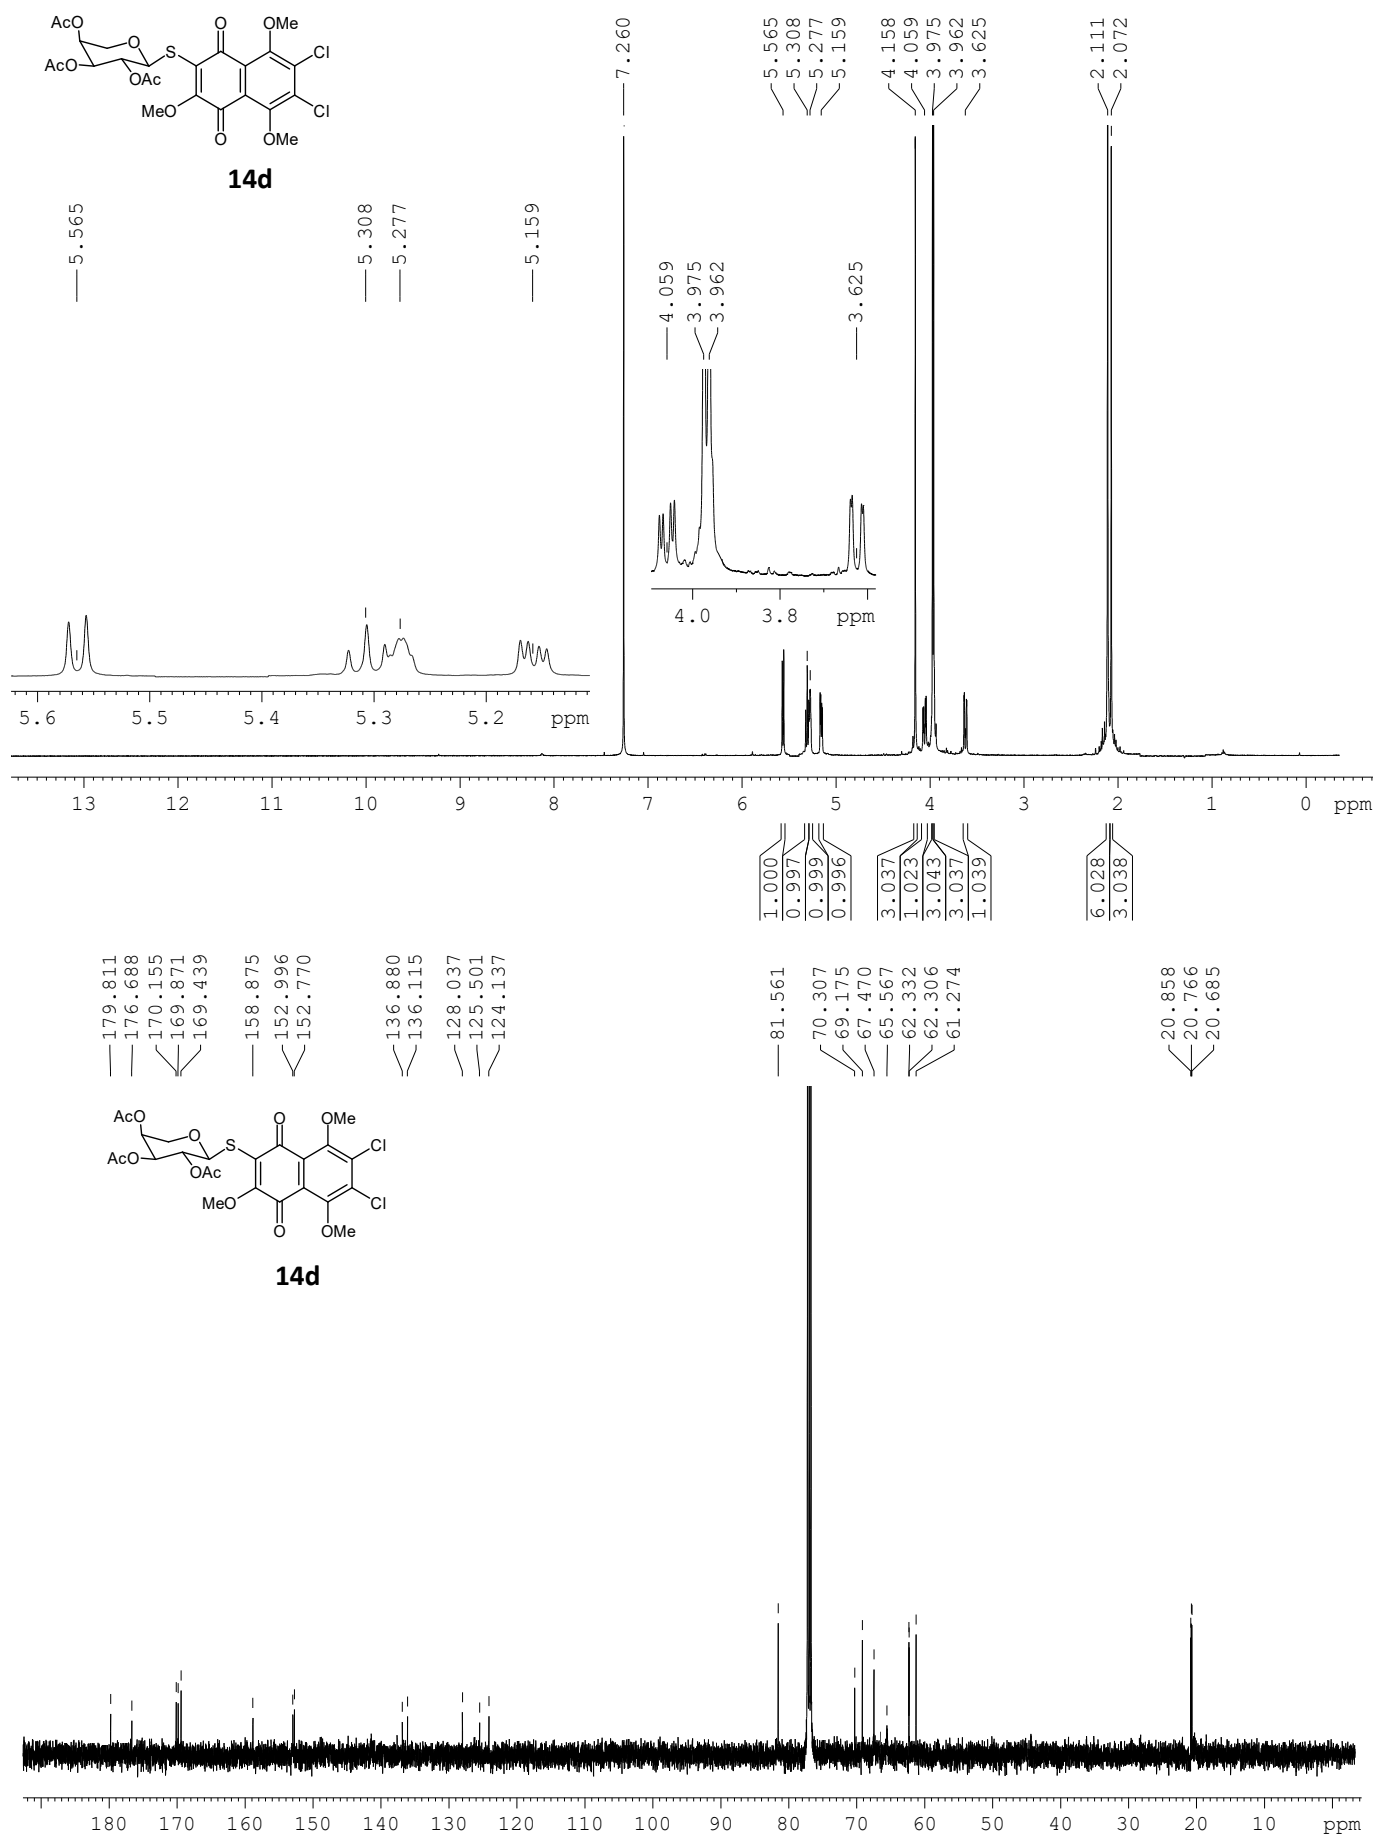

2-(2,3,4,6-Tetra-O-acetyl- $\beta$ -D-glucopyranosyl-1-thio)-8-hydroxy-3-methoxy-1,4-naphthoquinone (**15a**), ( $^1\text{H}$  NMR - 700 MHz,  $^{13}\text{C}$  NMR - 176 MHz, solvent -  $\text{CDCl}_3$ )

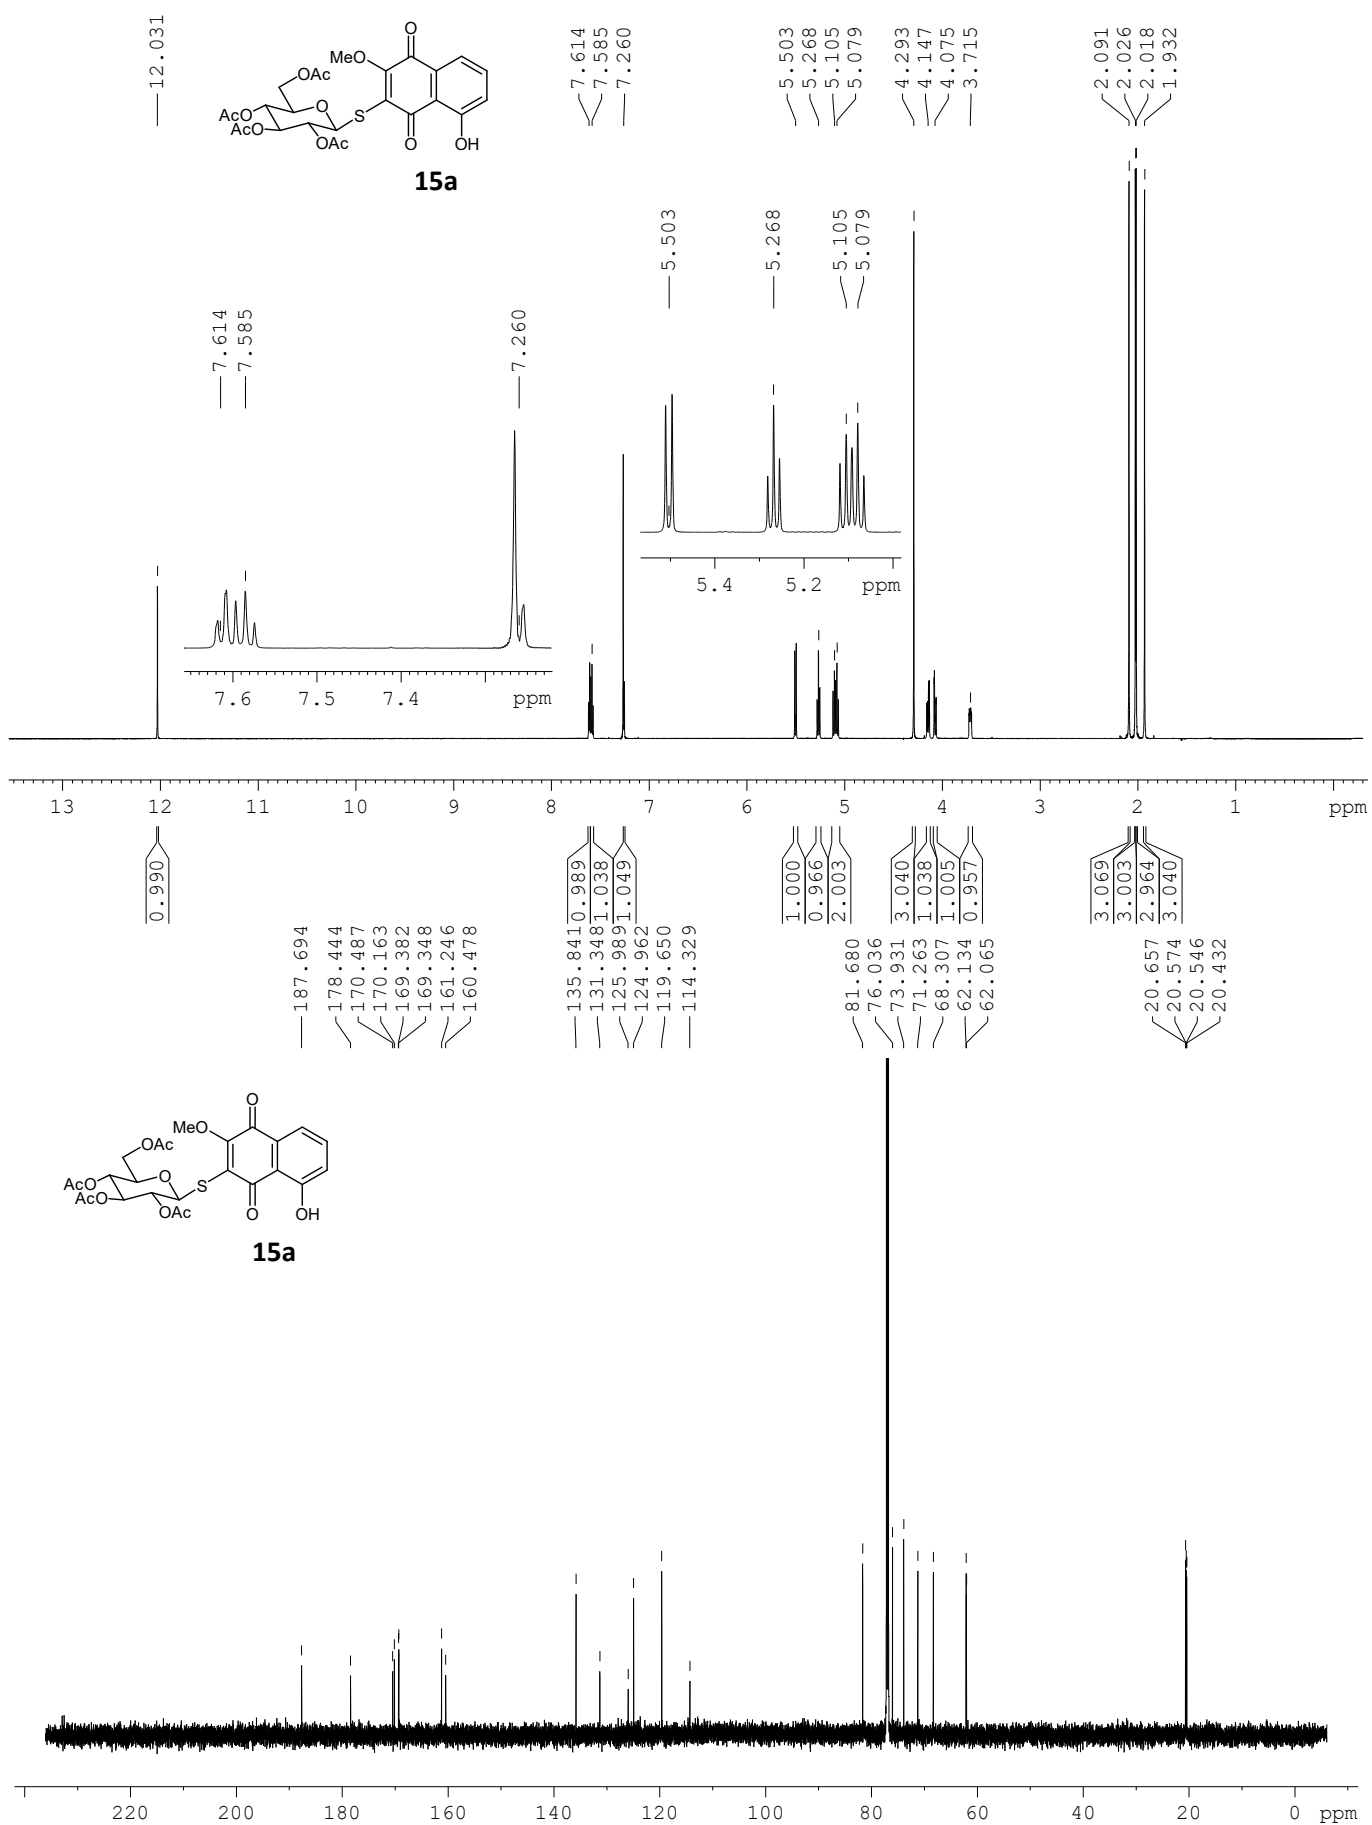

2-(2,3,4,6-Tetra-O-acetyl- $\beta$ -D-galactopyranosyl-1-thio)-8-hydroxy-3-methoxy-1,4-naphthoquinone (**15b**), ( $^1\text{H}$  NMR - 500 MHz,  $^{13}\text{C}$  NMR - 125 MHz, solvent -  $\text{CDCl}_3$ )

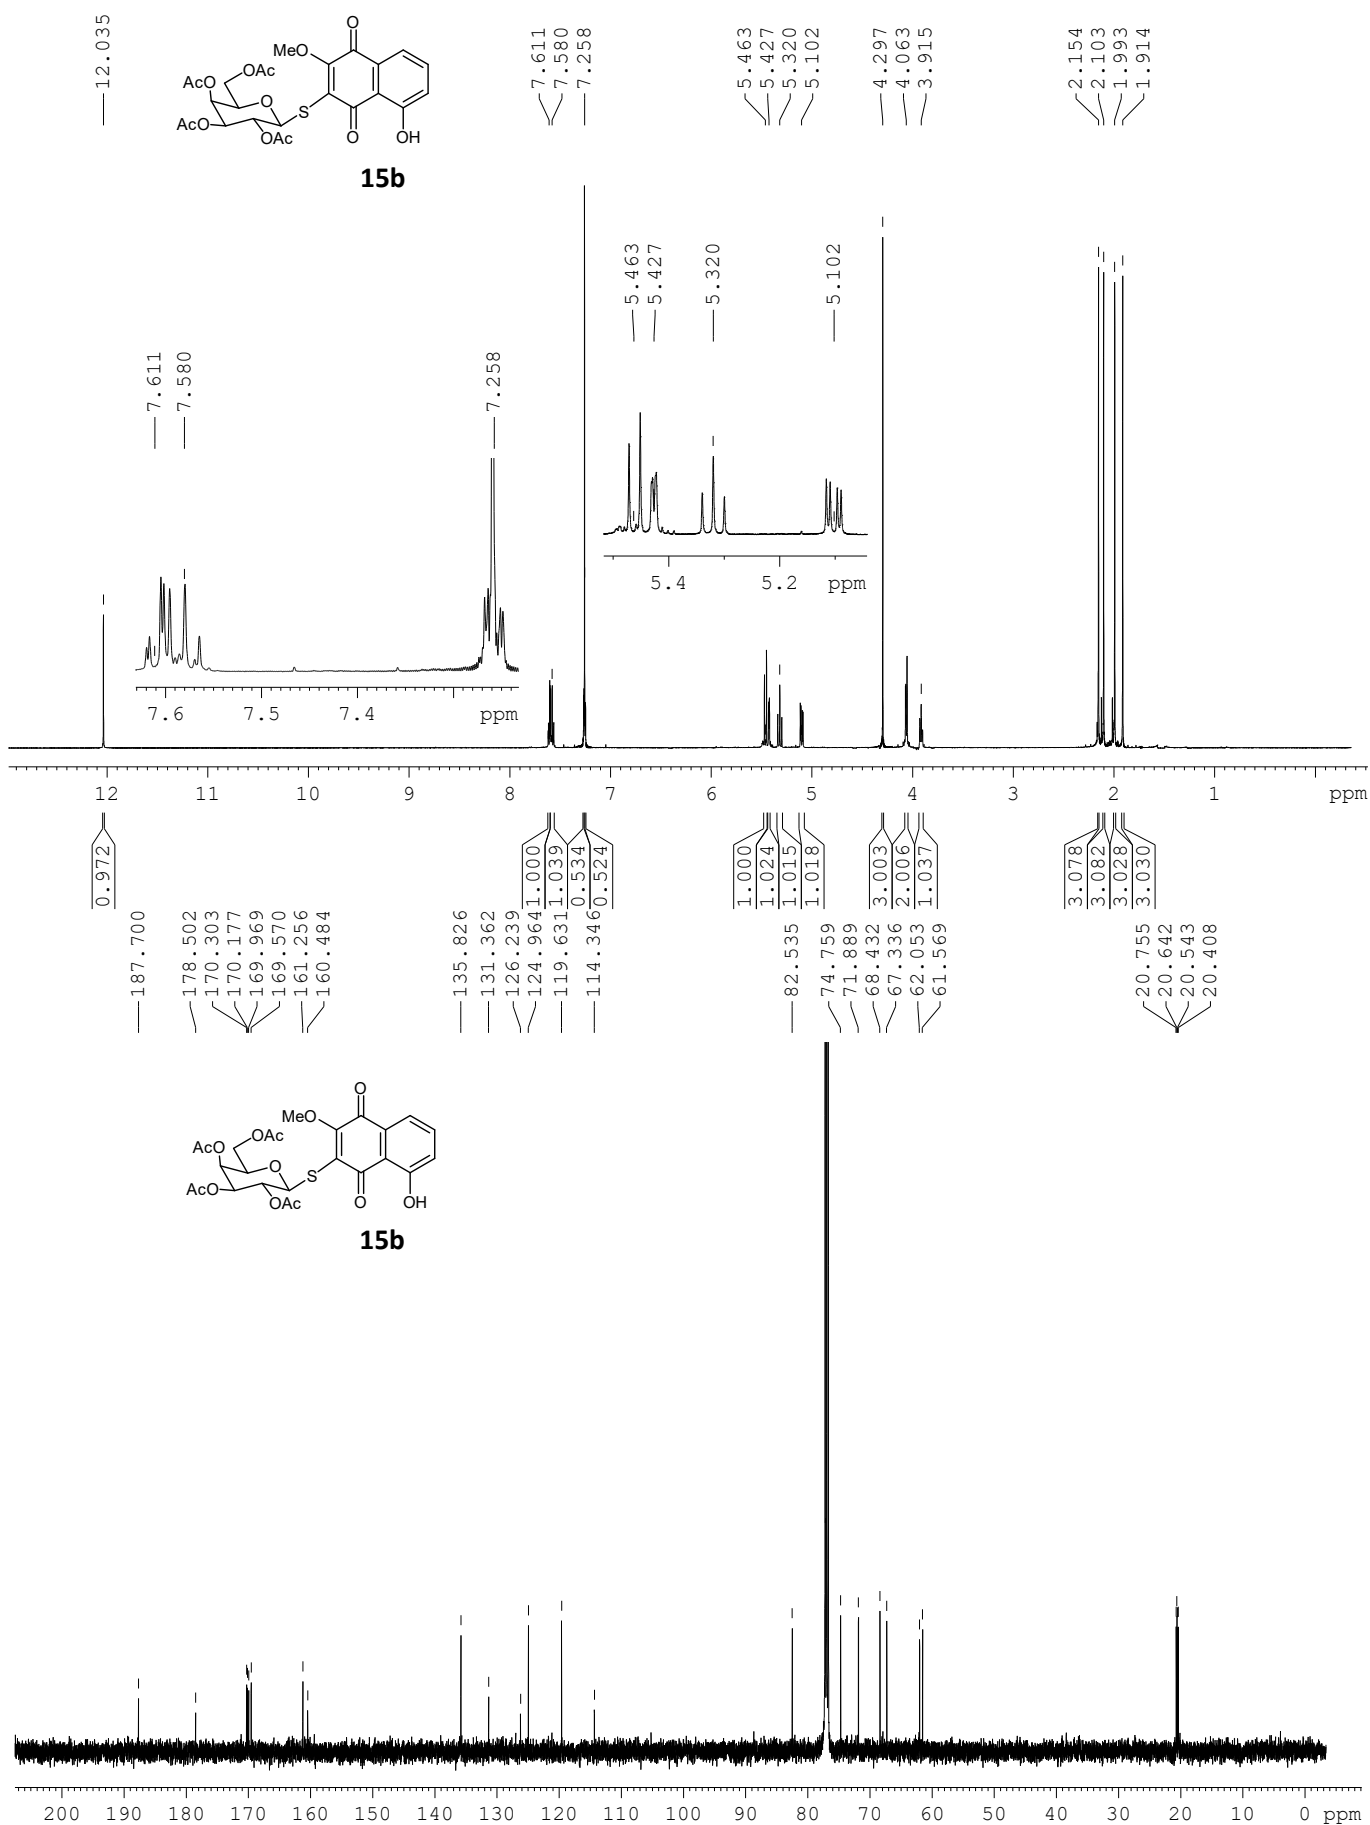

2-(2,3,4-Tri-O-acetyl- $\beta$ -D-xylopyranosyl-1-thio)-8-hydroxy-3-methoxy-1,4-naphthoquinone (**15c**), ( $^1\text{H}$  NMR - 500 MHz,  $^{13}\text{C}$  NMR - 125 MHz, solvent -  $\text{CDCl}_3$ )

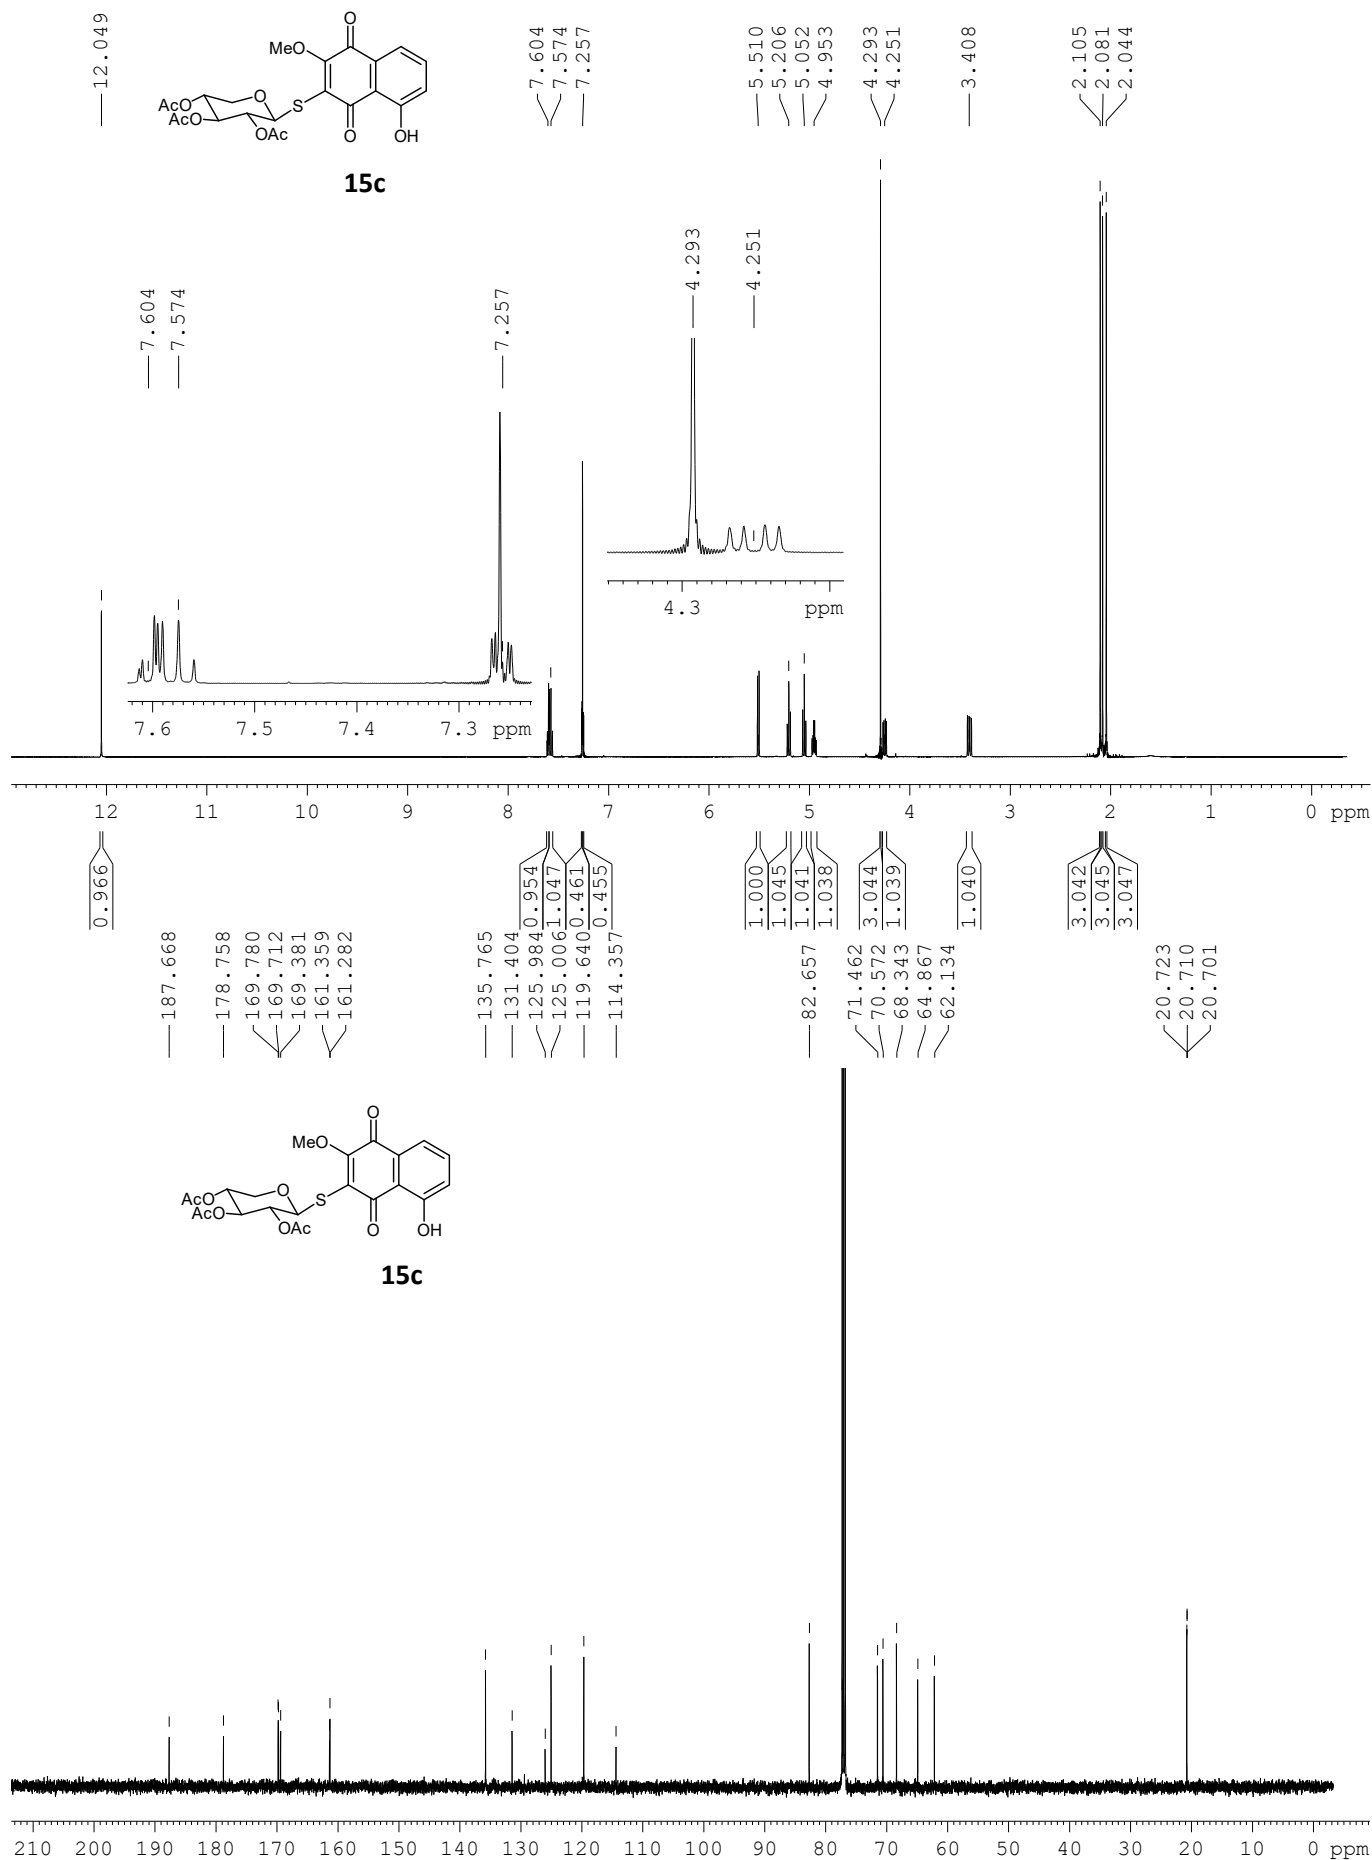

2-(2,3,4-Tri-O-acetyl- $\alpha$ -L-arabinopyranosyl-1-thio)-8-hydroxy-3-methoxy-1,4-naphthoquinone (**15d**), ( $^1\text{H}$  NMR - 500 MHz,  $^{13}\text{C}$  NMR - 125 MHz, solvent -  $\text{CDCl}_3$ )

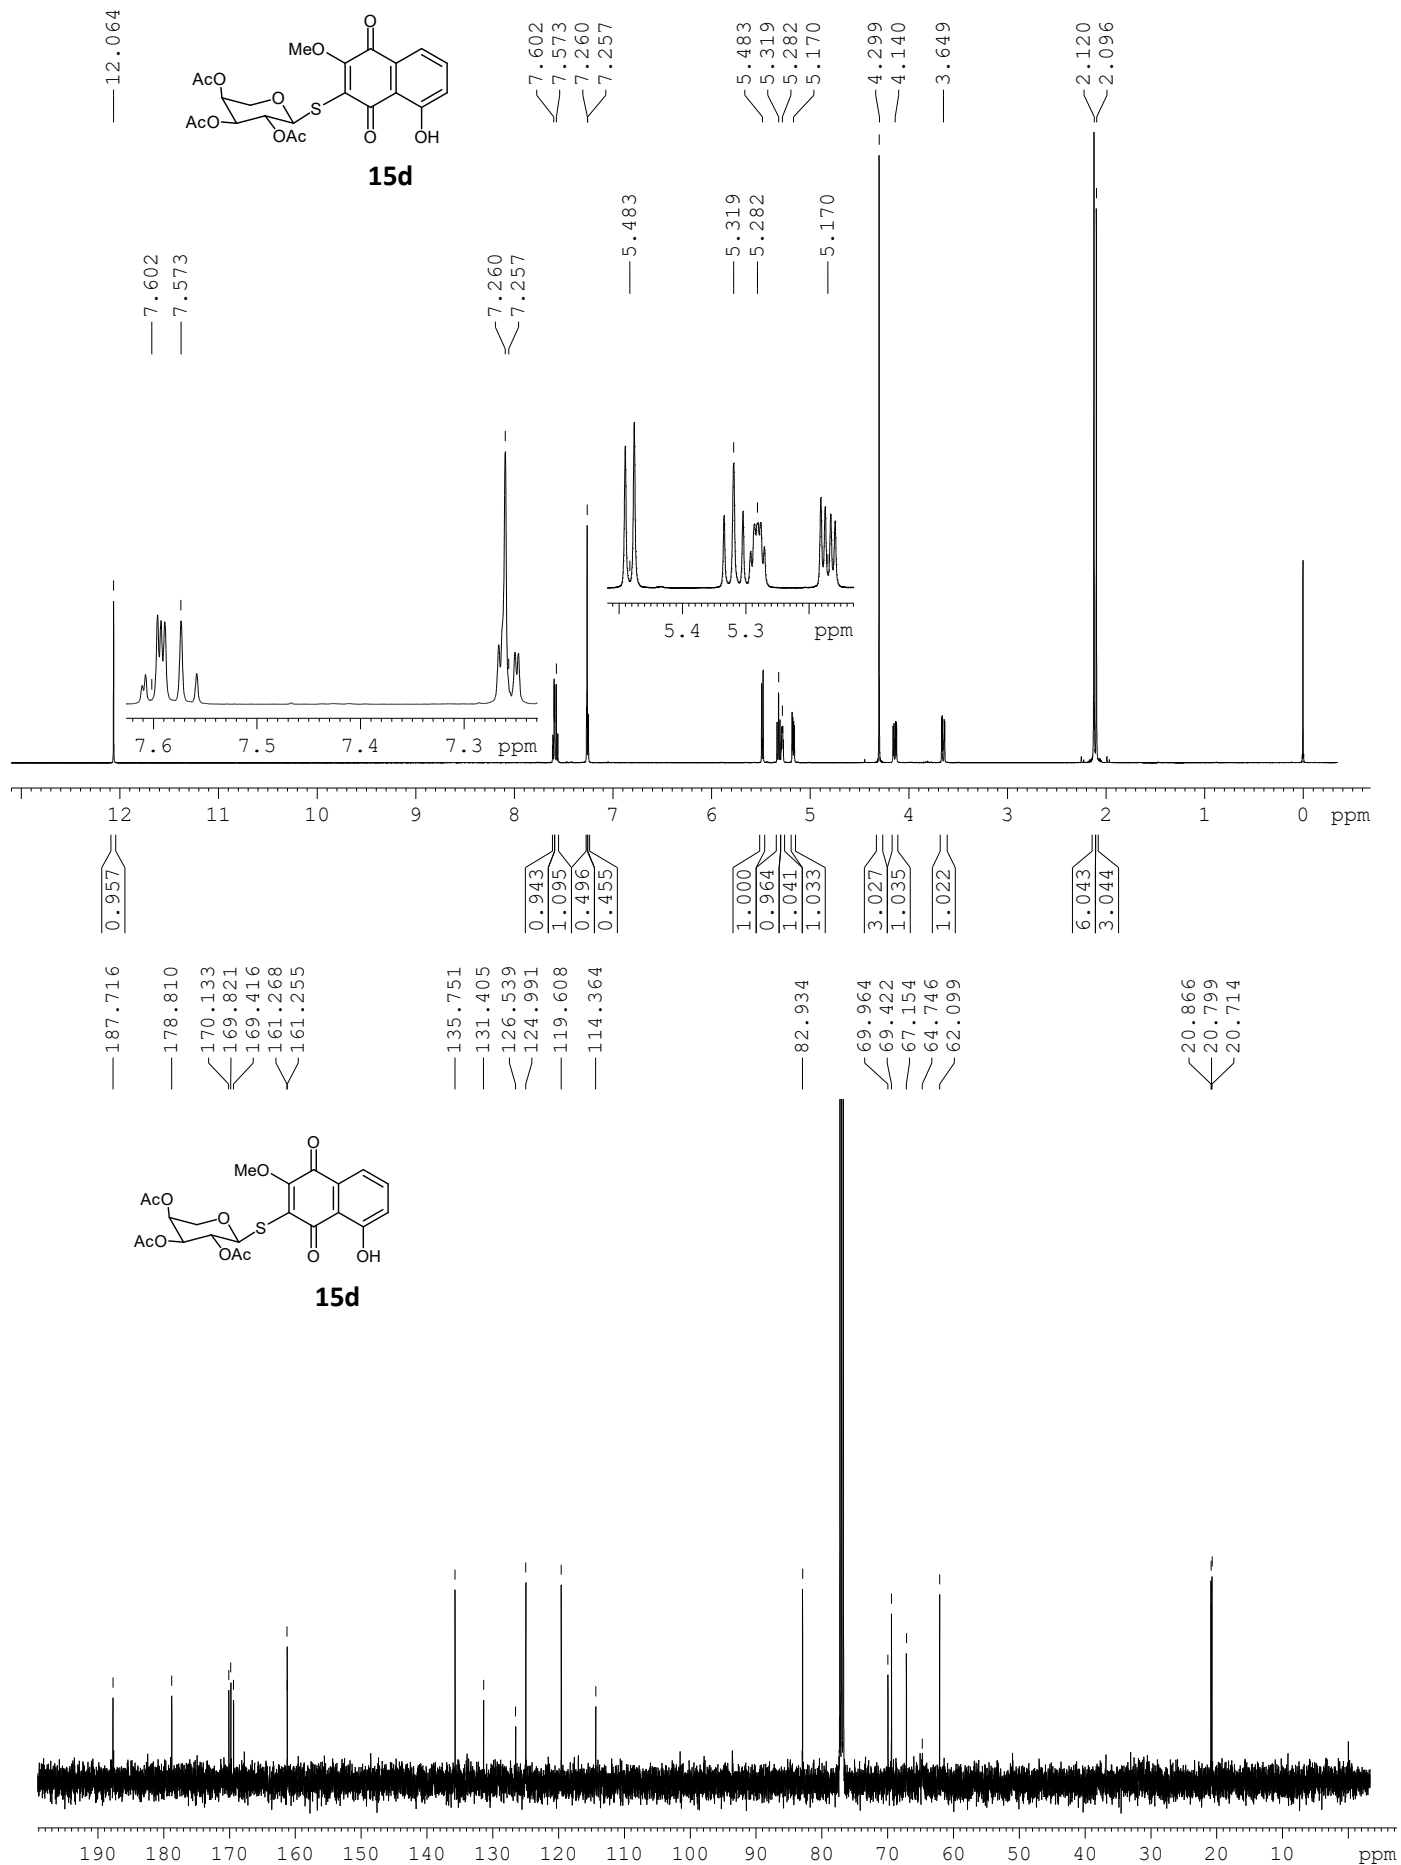

2-(2,3,4,6-Tetra-O-acetyl- $\beta$ -D-glucopyranosyl-1-thio)-5-hydroxy-3-methoxy-1,4-naphthoquinone (**16a**), ( $^1\text{H}$  NMR - 500 MHz,  $^{13}\text{C}$  NMR - 125 MHz, solvent -  $\text{CDCl}_3$ )

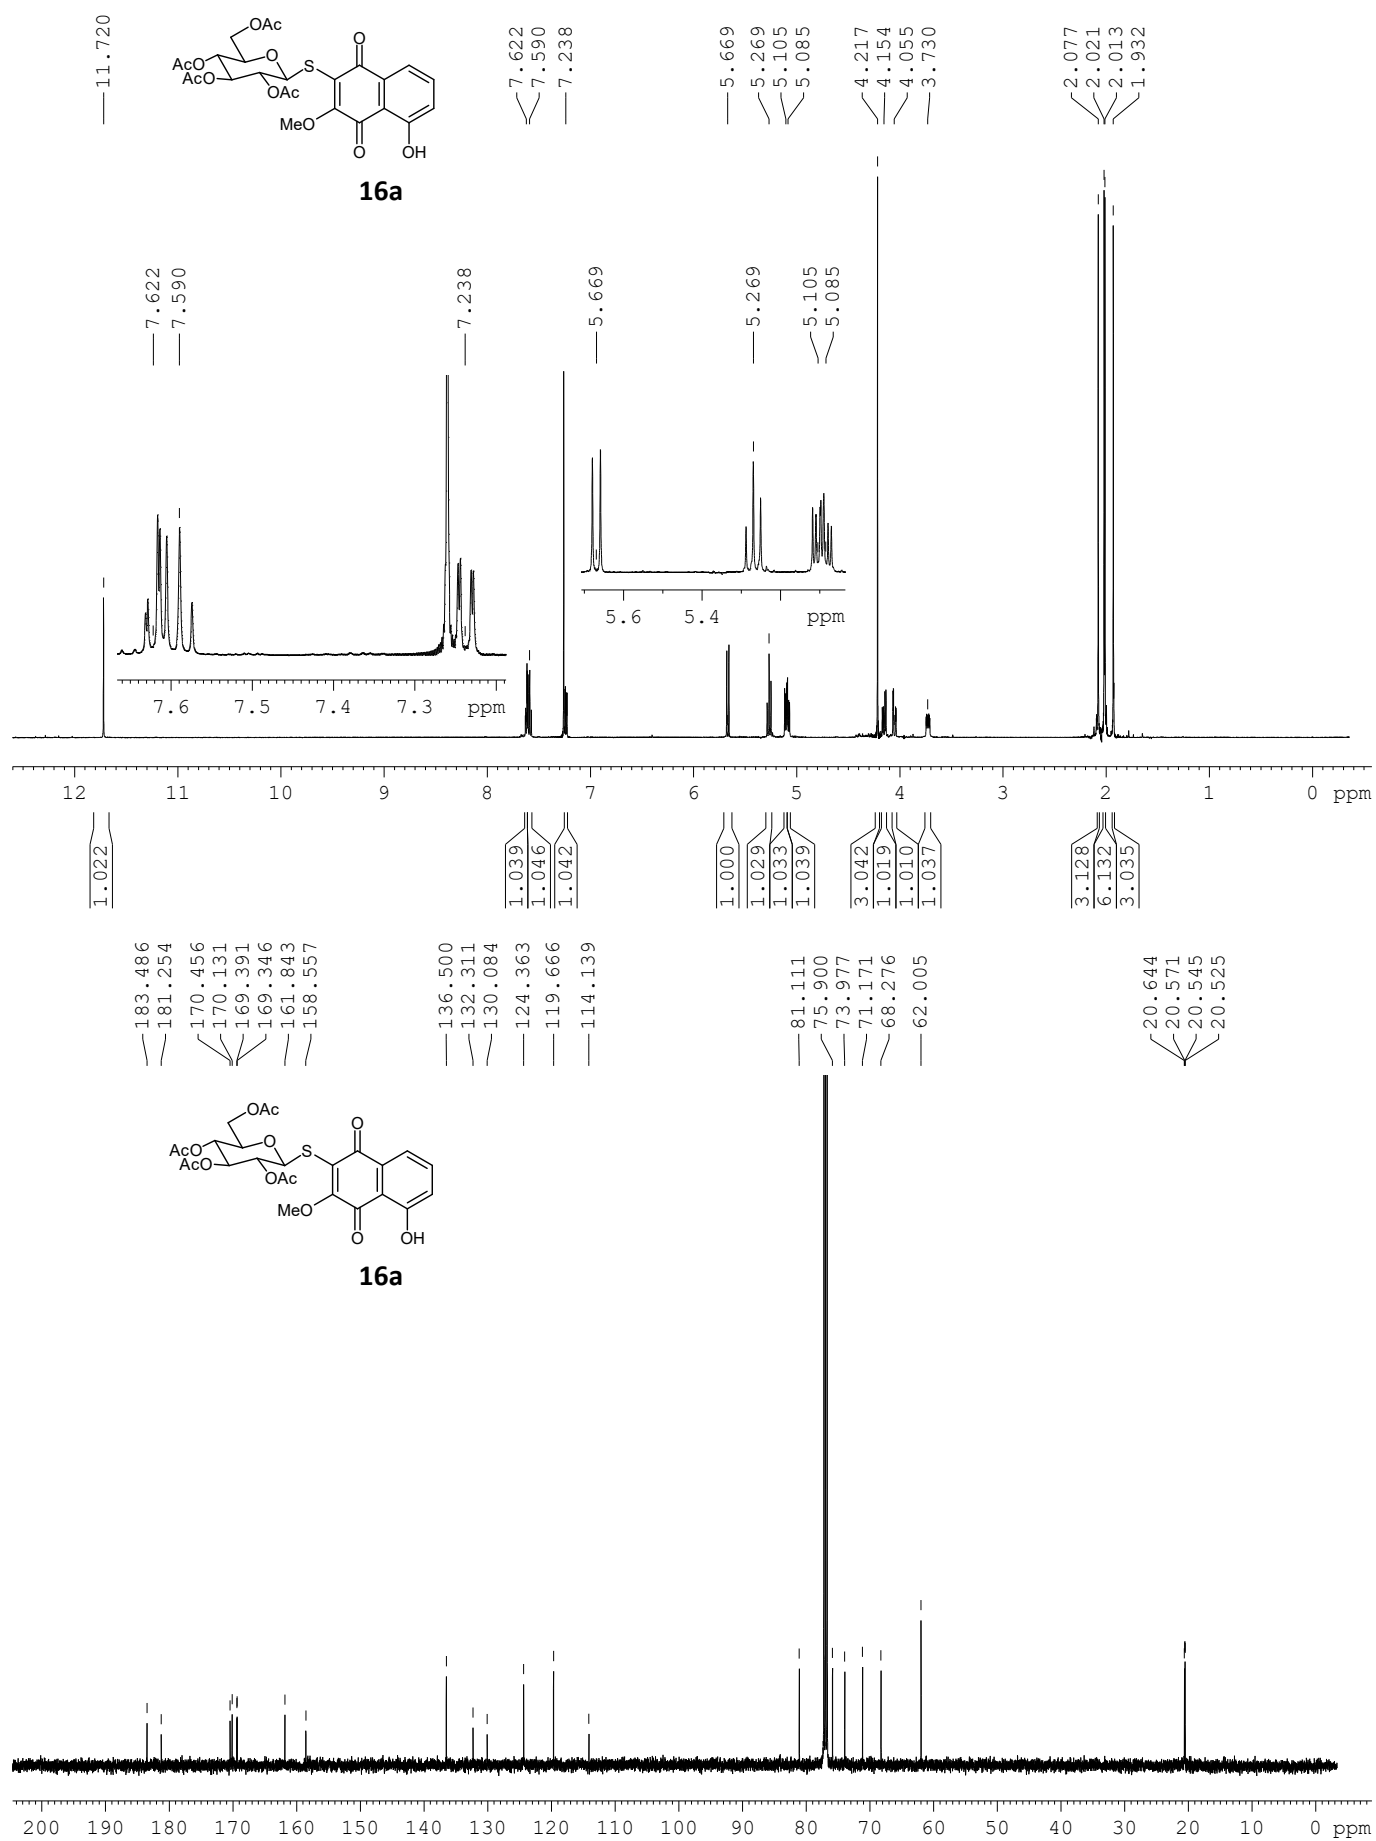

2-(2,3,4,6-Tetra-O-acetyl- $\beta$ -D-galactopyranosyl-1-thio)-5-hydroxy-3-methoxy-1,4-naphthoquinone (**16b**), ( $^1\text{H}$  NMR - 500 MHz,  $^{13}\text{C}$  NMR - 125 MHz, solvent -  $\text{CDCl}_3$ )

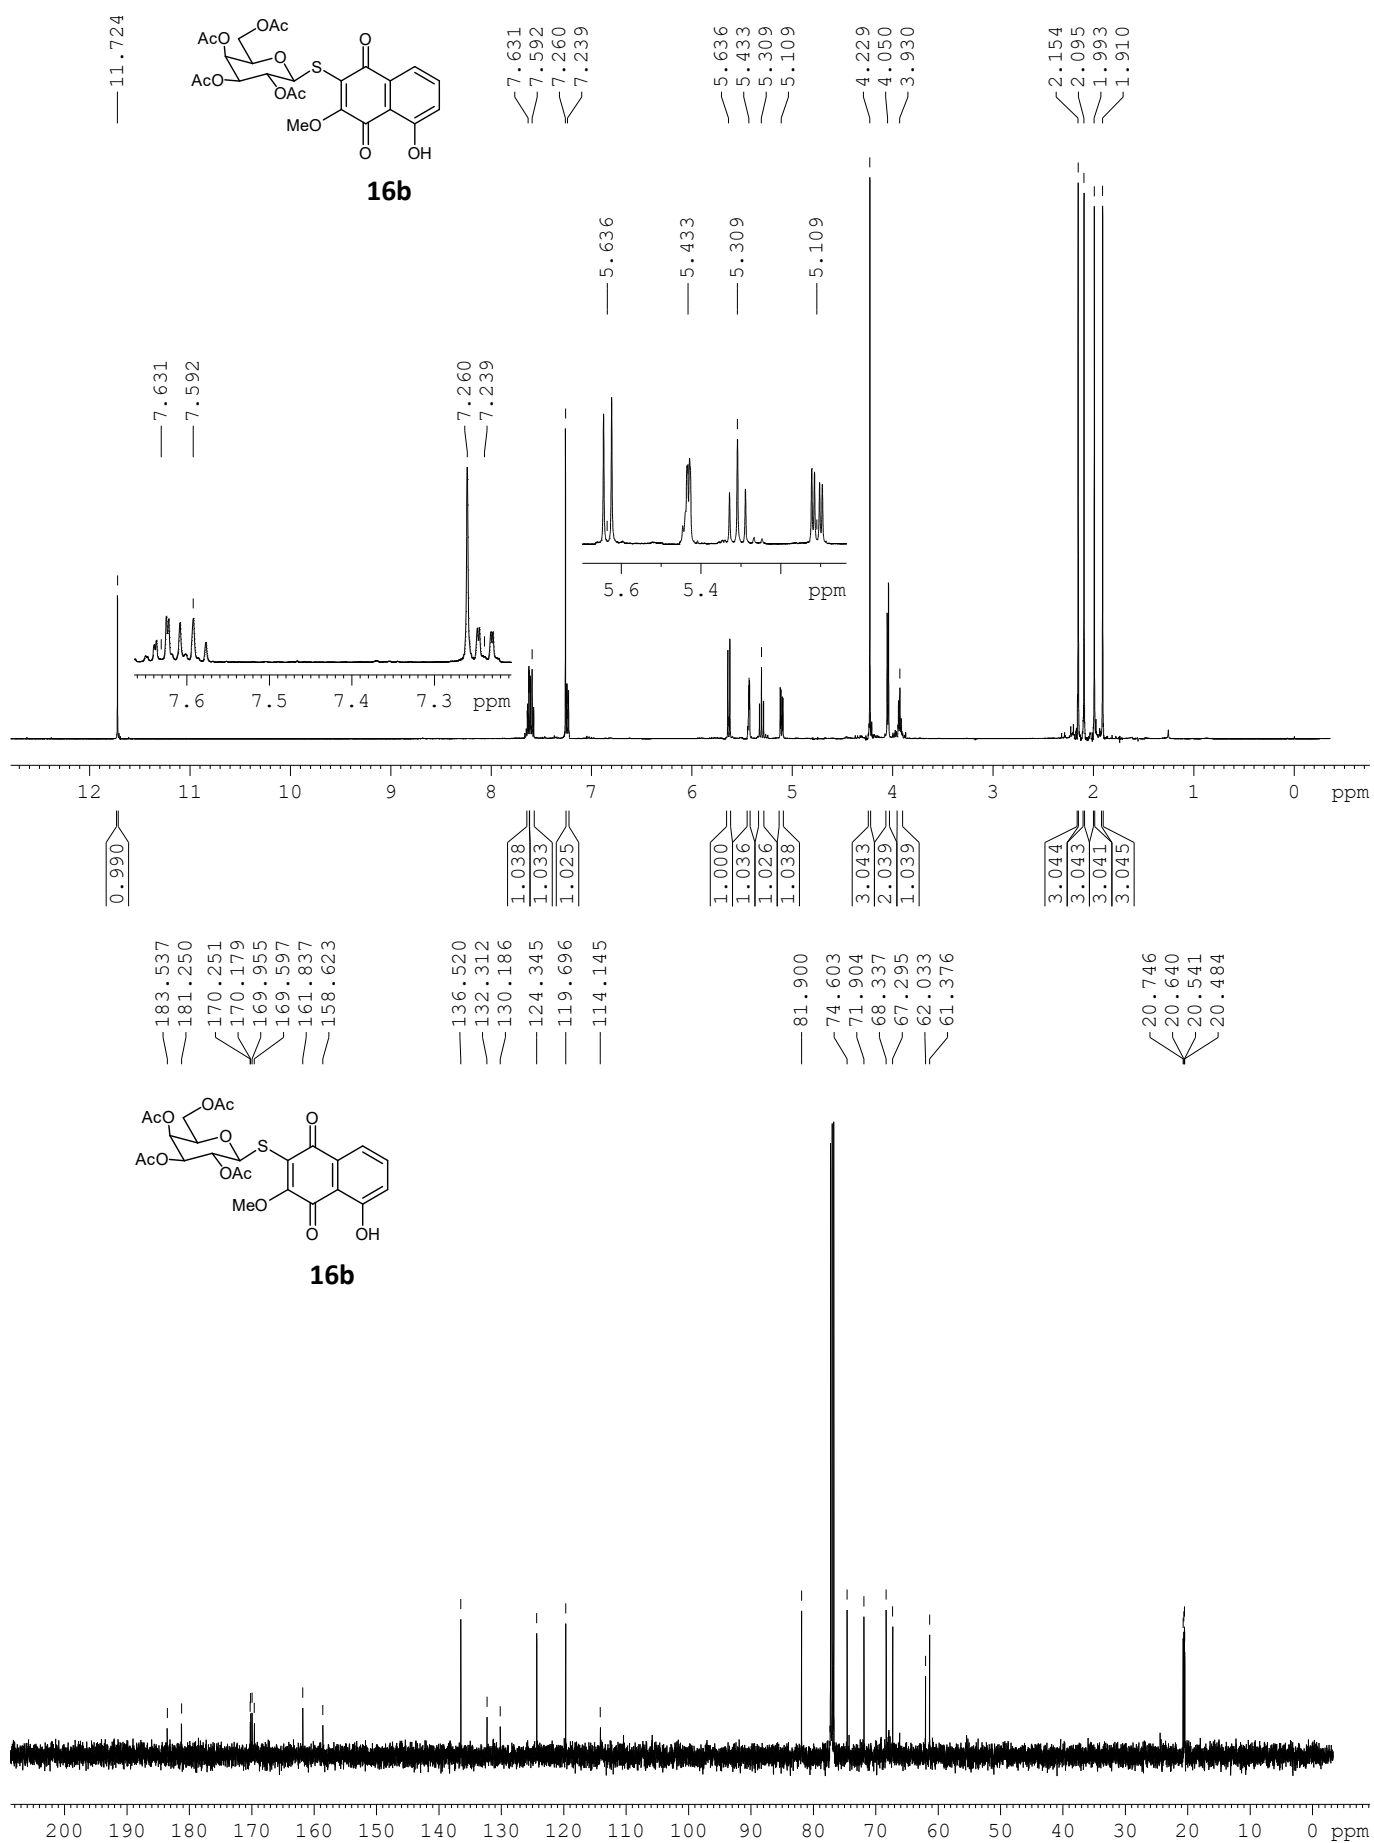

2-(2,3,4-Tri-O-acetyl- $\beta$ -D-xylopyranosyl-1-thio)-5-hydroxy-3-methoxy-1,4-naphthoquinone (**16c**), ( $^1\text{H}$  NMR - 500 MHz,  $^{13}\text{C}$  NMR - 125 MHz, solvent -  $\text{CDCl}_3$ )

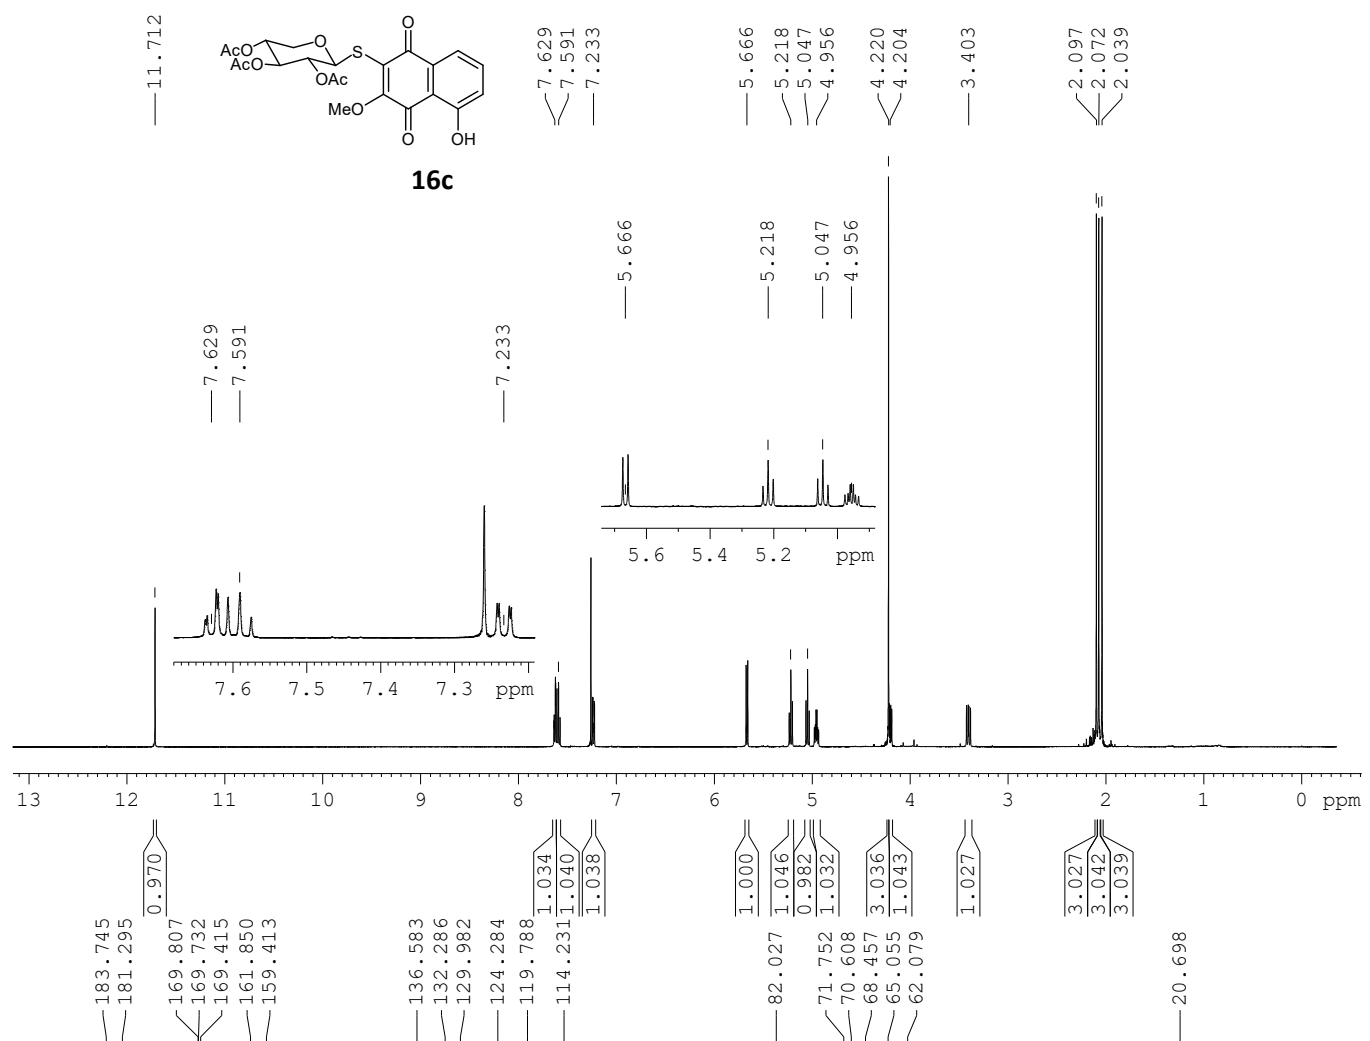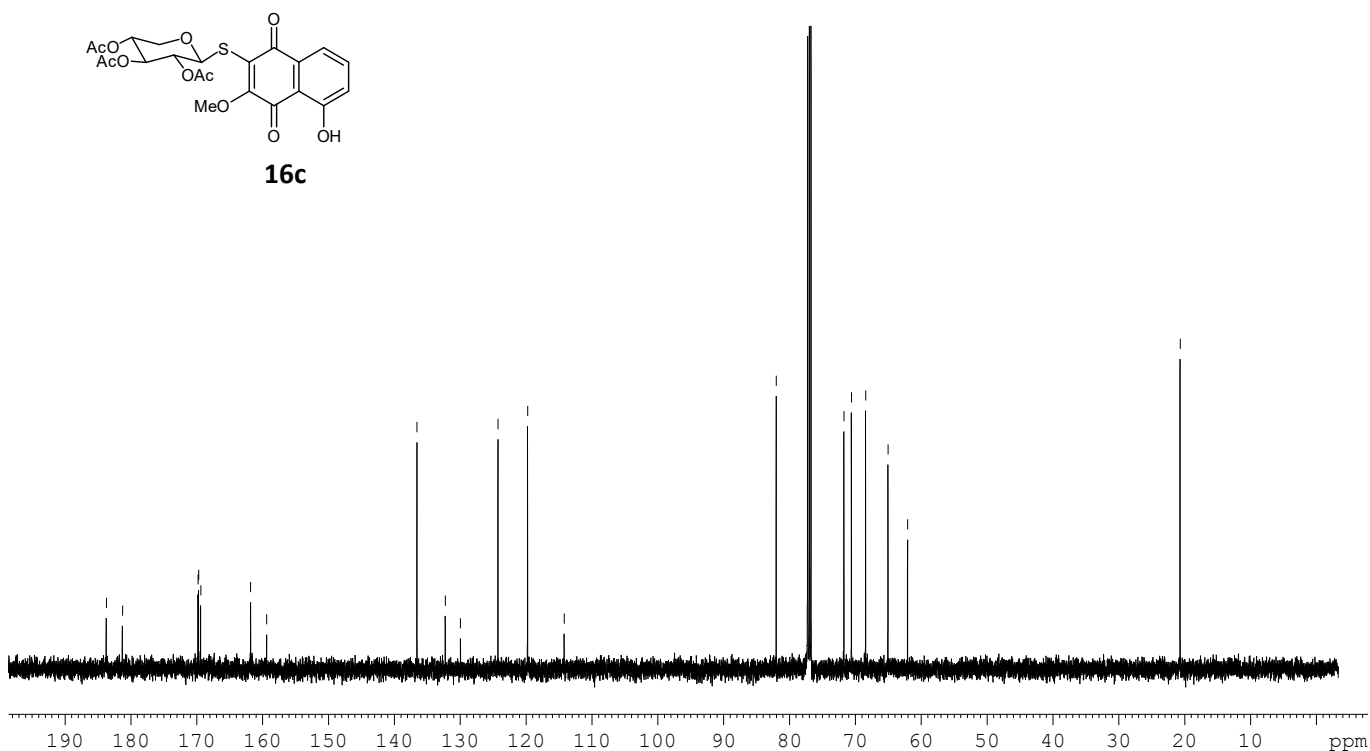



2-(2,3,4-Tri-O-acetyl- $\alpha$ -L-arabinopyranosyl-1-thio)-5-hydroxy-3-methoxy-1,4-naphthoquinone (**16d**), ( $^1\text{H}$  NMR - 700 MHz,  $^{13}\text{C}$  NMR - 176 MHz, solvent -  $\text{CDCl}_3$ )

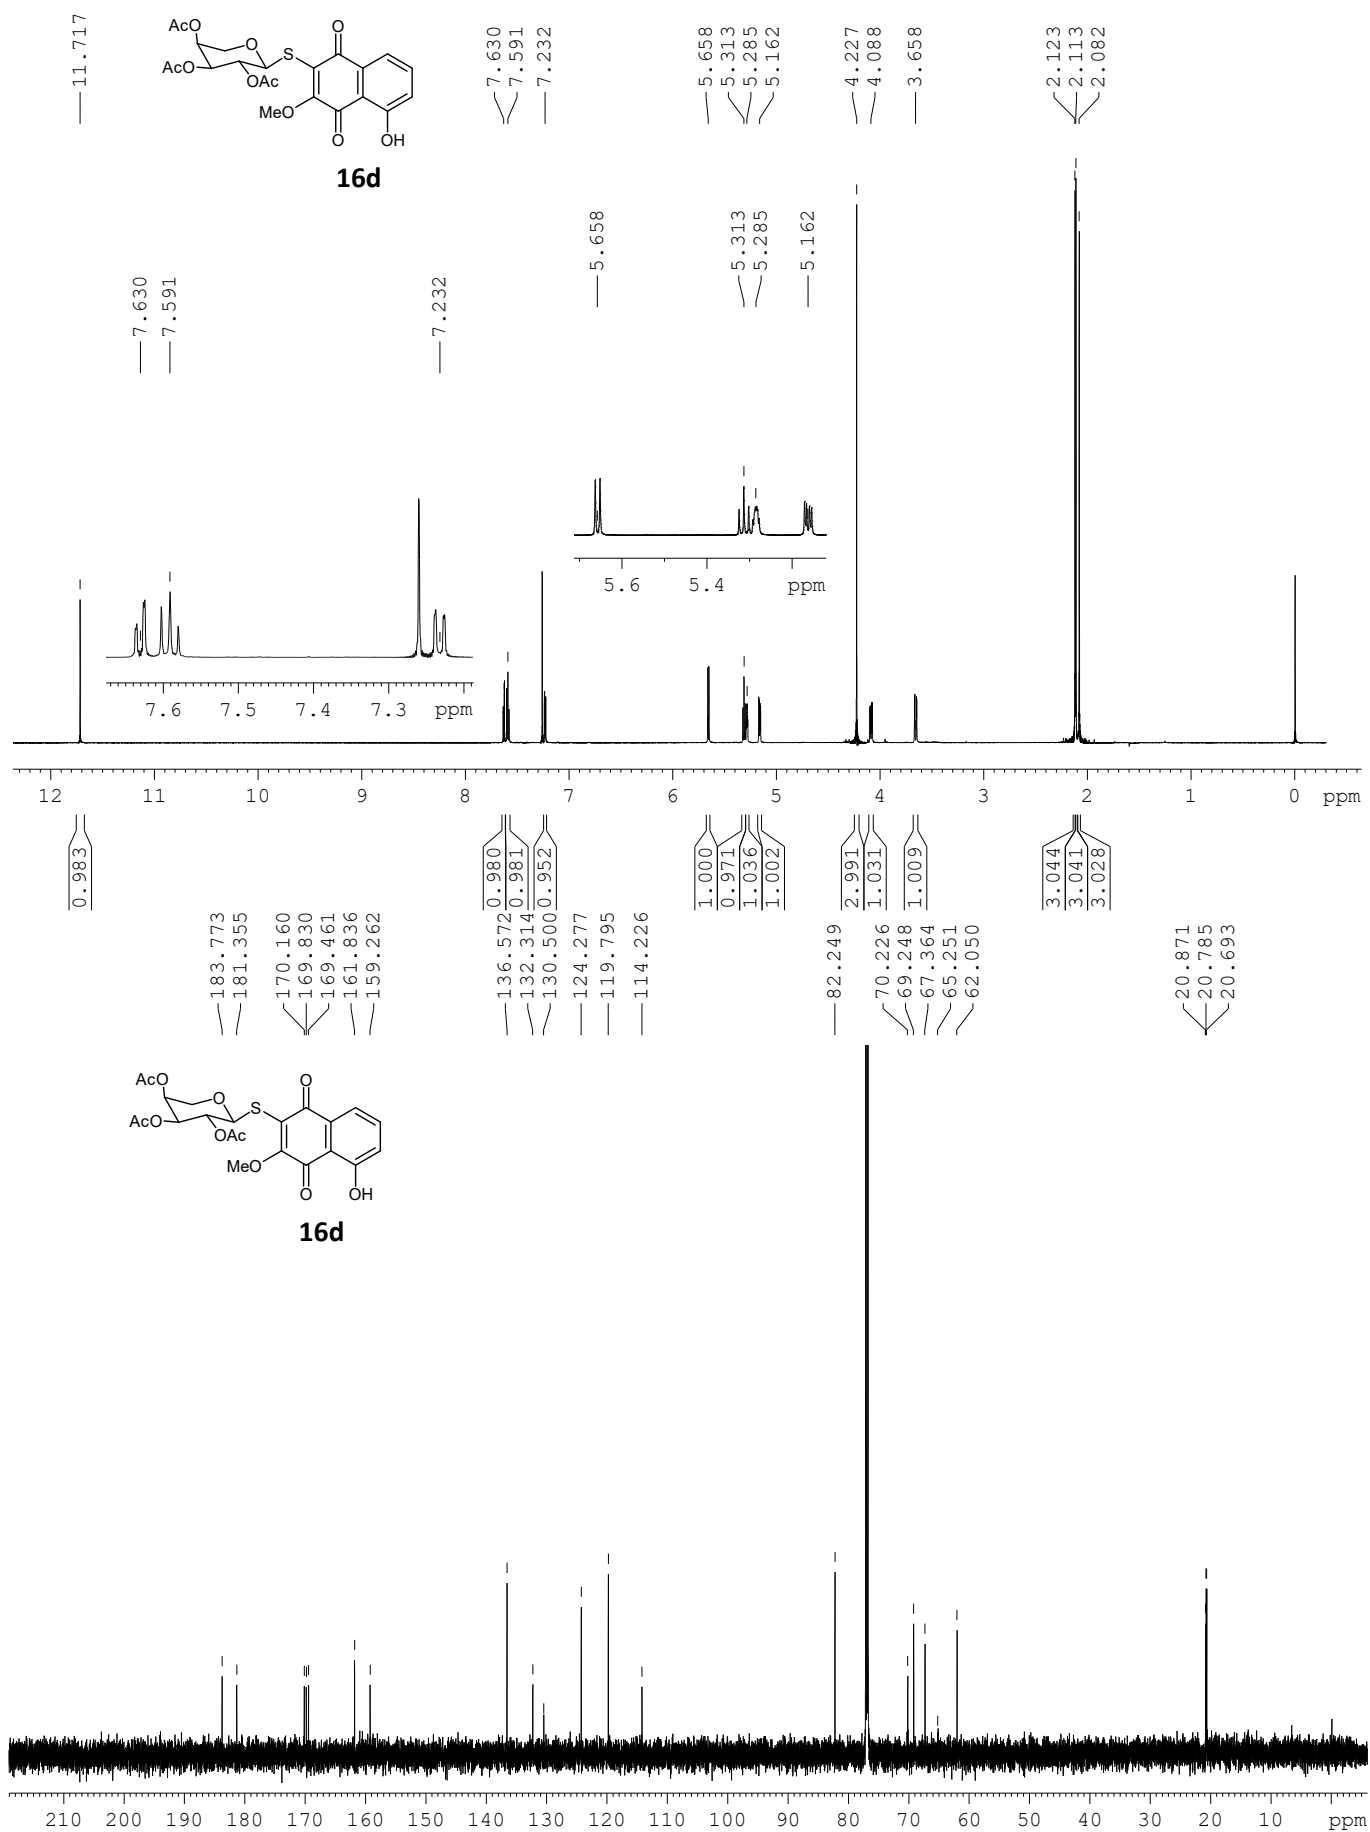

(2*R*,3*S*,4*S*,4*aR*,12*aS*)-3,4-Dihydroxy-2-hydroxymethyl-7,10-dimethoxy-3,4,4*a*,12*a*-tetrahydro-2*H*-naphtho[2,3-*b*]pyrano[2,3-*e*][1,4]oxathiine-6,11-dione (**17a**), (<sup>1</sup>H NMR - 700 MHz, <sup>13</sup>C NMR - 176 MHz, solvent - DMSO-*d*<sub>6</sub>)

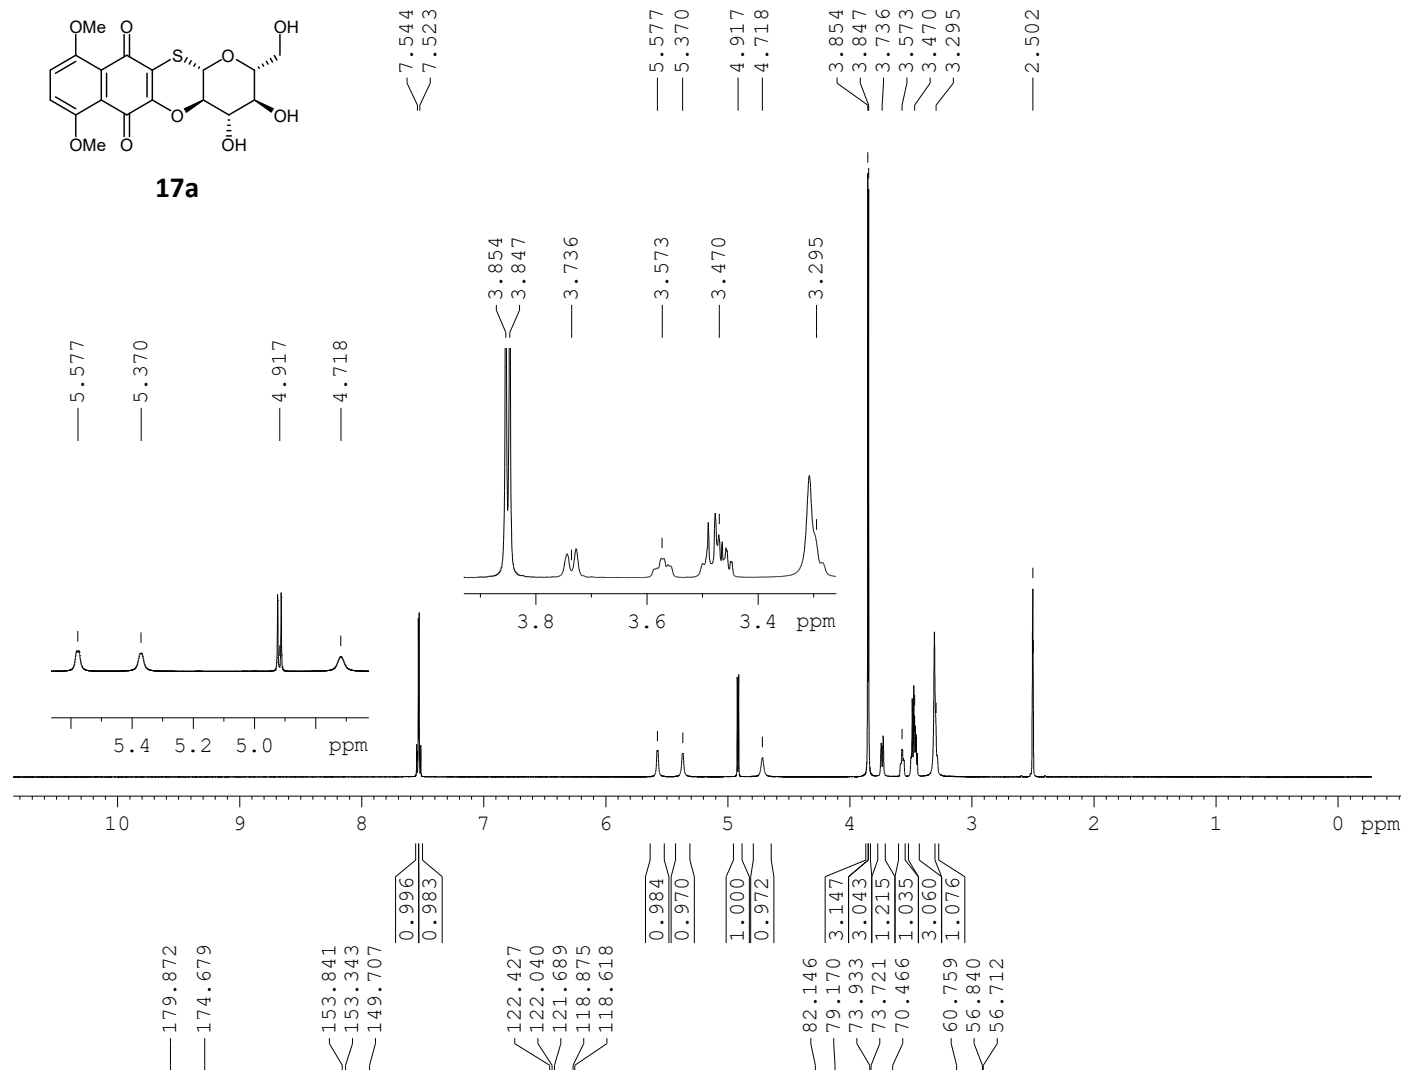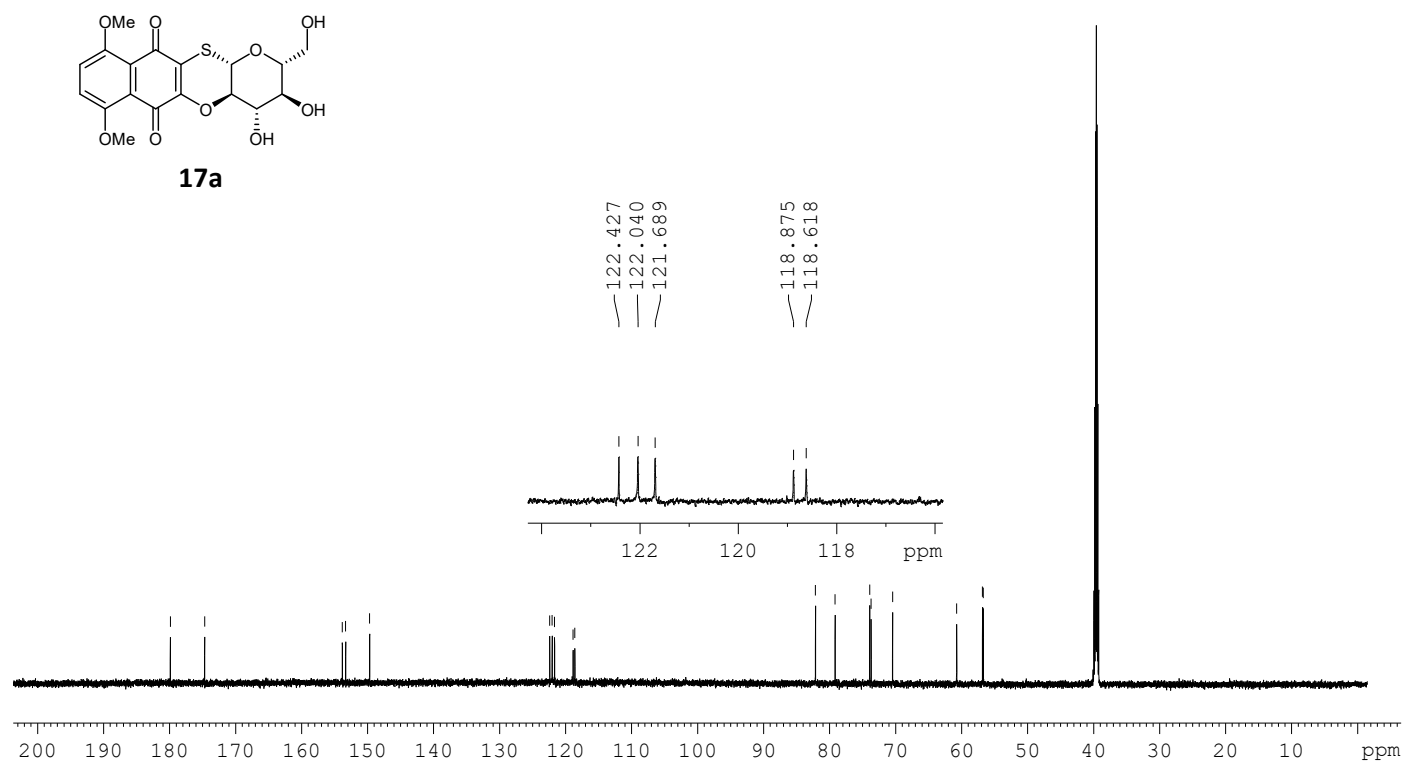

(2*R*,3*R*,4*S*,4*aR*,12*aS*)-3,4-Dihydroxy-2-hydroxymethyl-7,10-dimethoxy-3,4,4*a*,12*a*-tetrahydro-2*H*-naphtho[2,3-*b*]pyrano[2,3-*e*][1,4]oxathiine-6,11-dione (**17b**), (<sup>1</sup>H NMR - 500 MHz, <sup>13</sup>C NMR - 125 MHz, solvent - DMSO-*d*<sub>6</sub>)

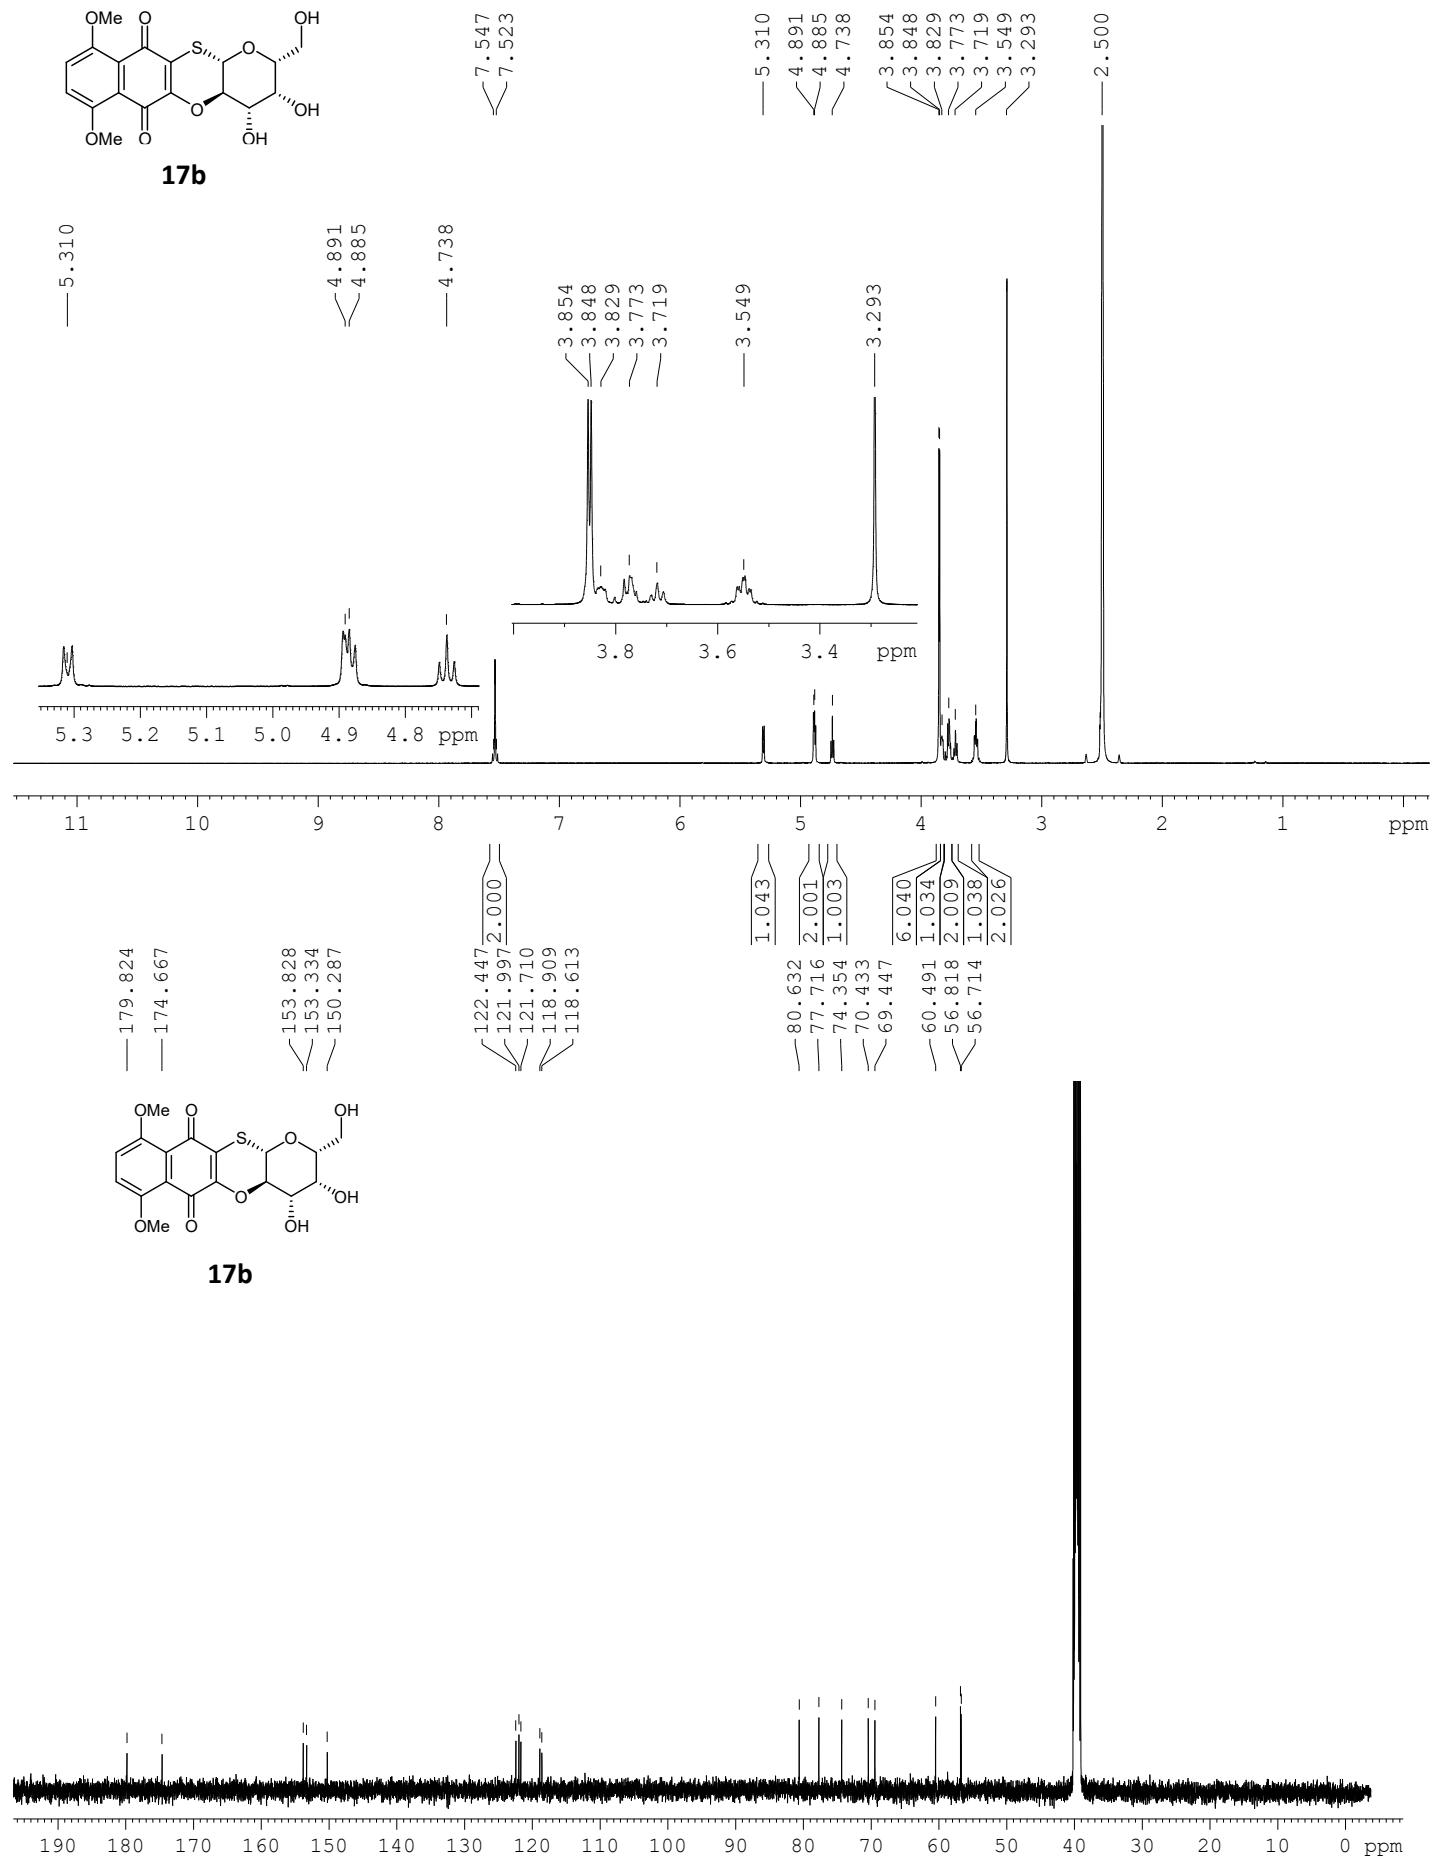

(3*R*,4*S*,4*aR*,12*aS*)-3,4-Dihydroxy-7,10-dimethoxy-3,4,4*a*,12*a*-tetrahydro-2*H*-naphtho[2,3-*b*]pyrano[2,3-*e*][1,4]oxathiine-6,11-dione (**17c**), (<sup>1</sup>H NMR - 700 MHz, <sup>13</sup>C NMR - 176 MHz, solvent - DMSO-*d*<sub>6</sub>)

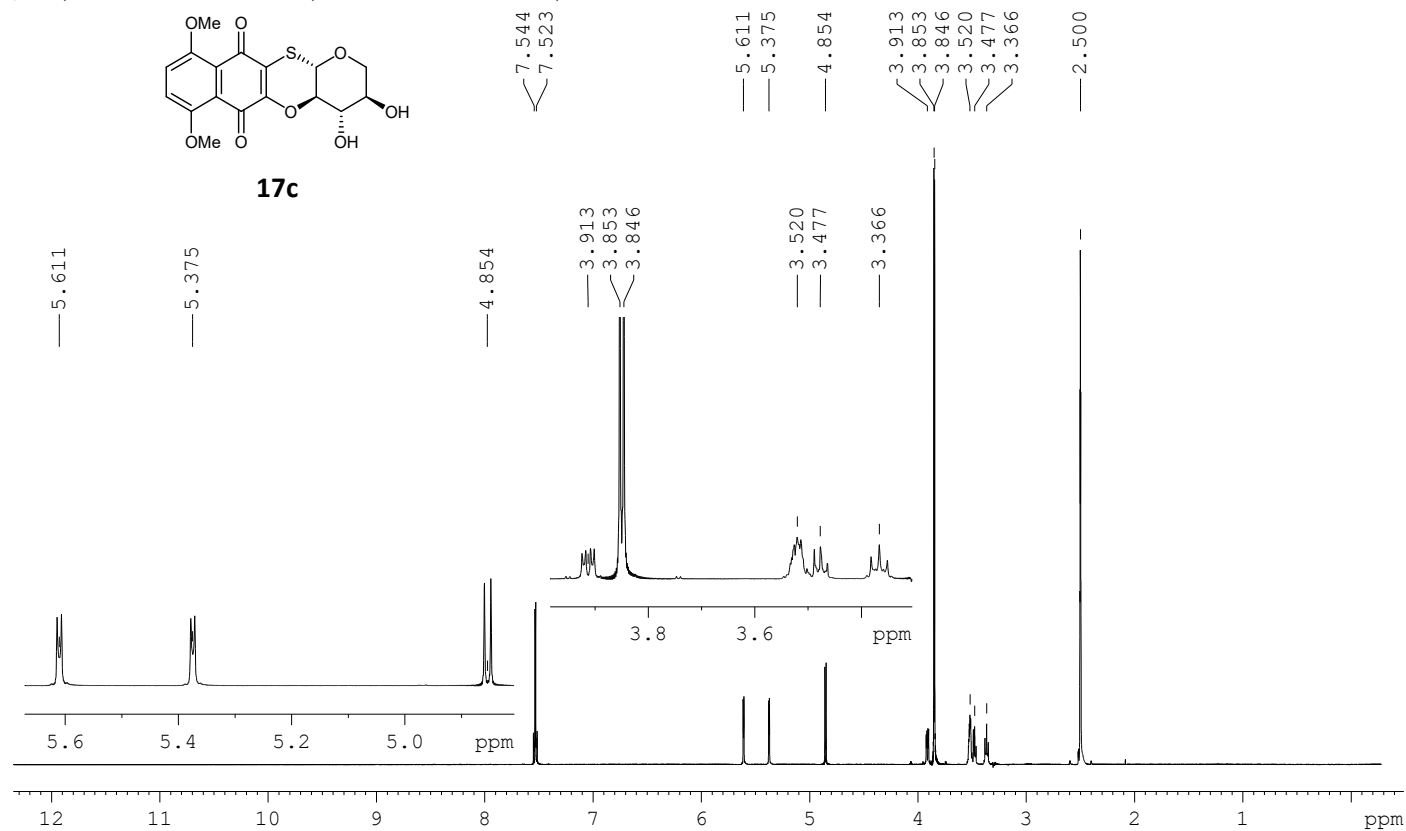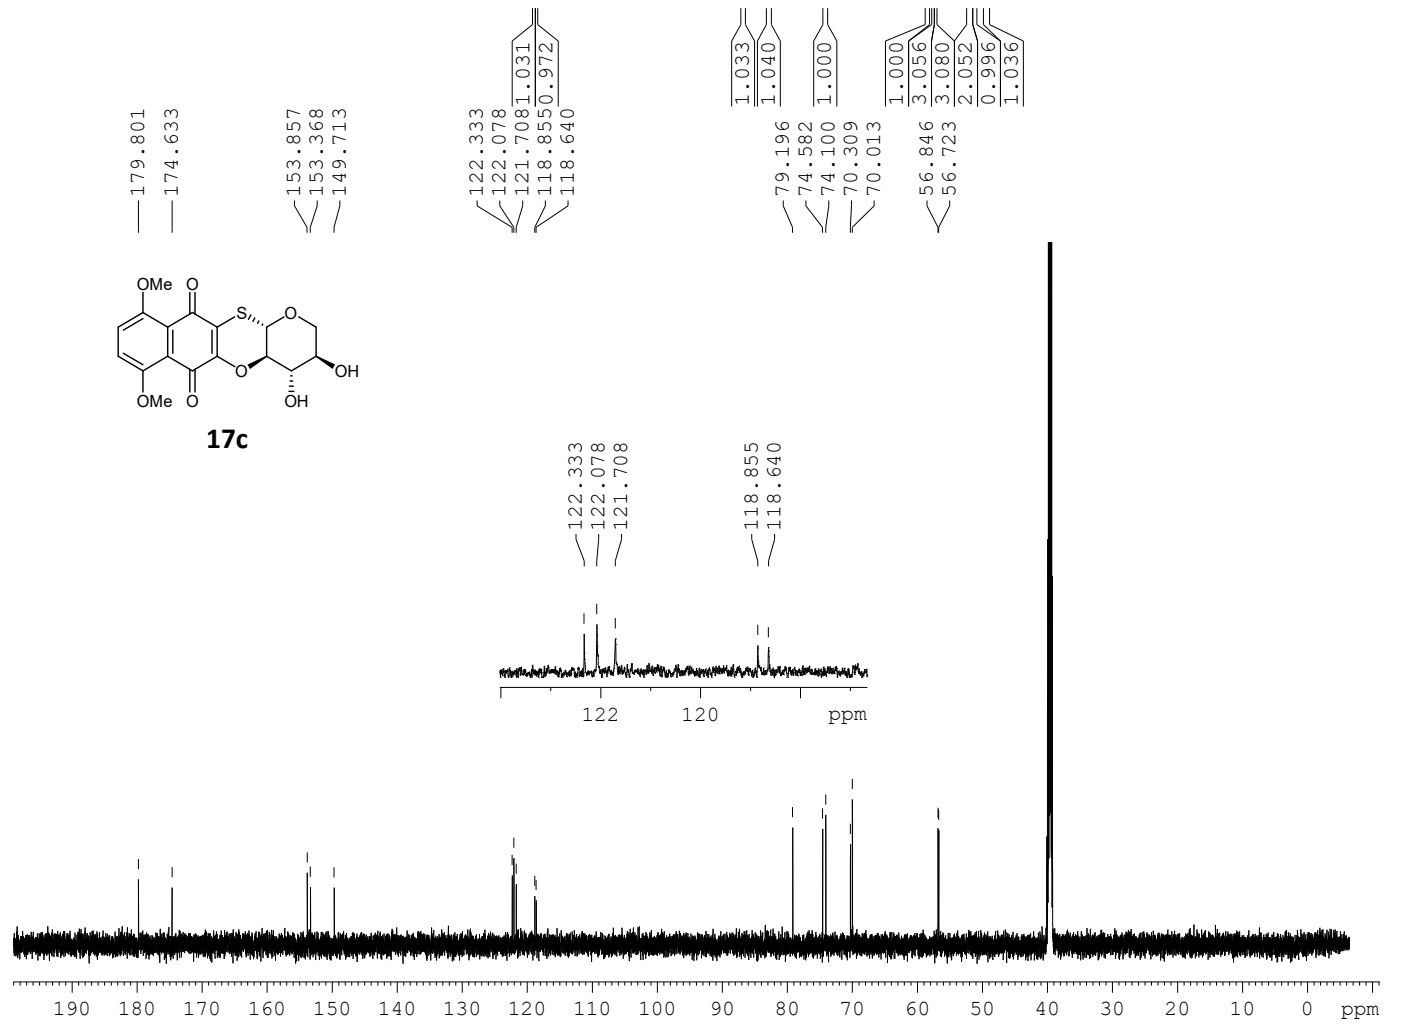

(3*S*,4*S*,4*aR*,12*aS*)-3,4-Dihydroxy-7,10-dimethoxy-3,4,4*a*,12*a*-tetrahydro-2*H*-naphtho[2,3-*b*]pyrano[2,3-*e*][1,4]oxathiine-6,11-dione  
**(17d)**, (<sup>1</sup>H NMR - 700 MHz, <sup>13</sup>C NMR - 176 MHz, solvent - DMSO-*d*<sub>6</sub>)

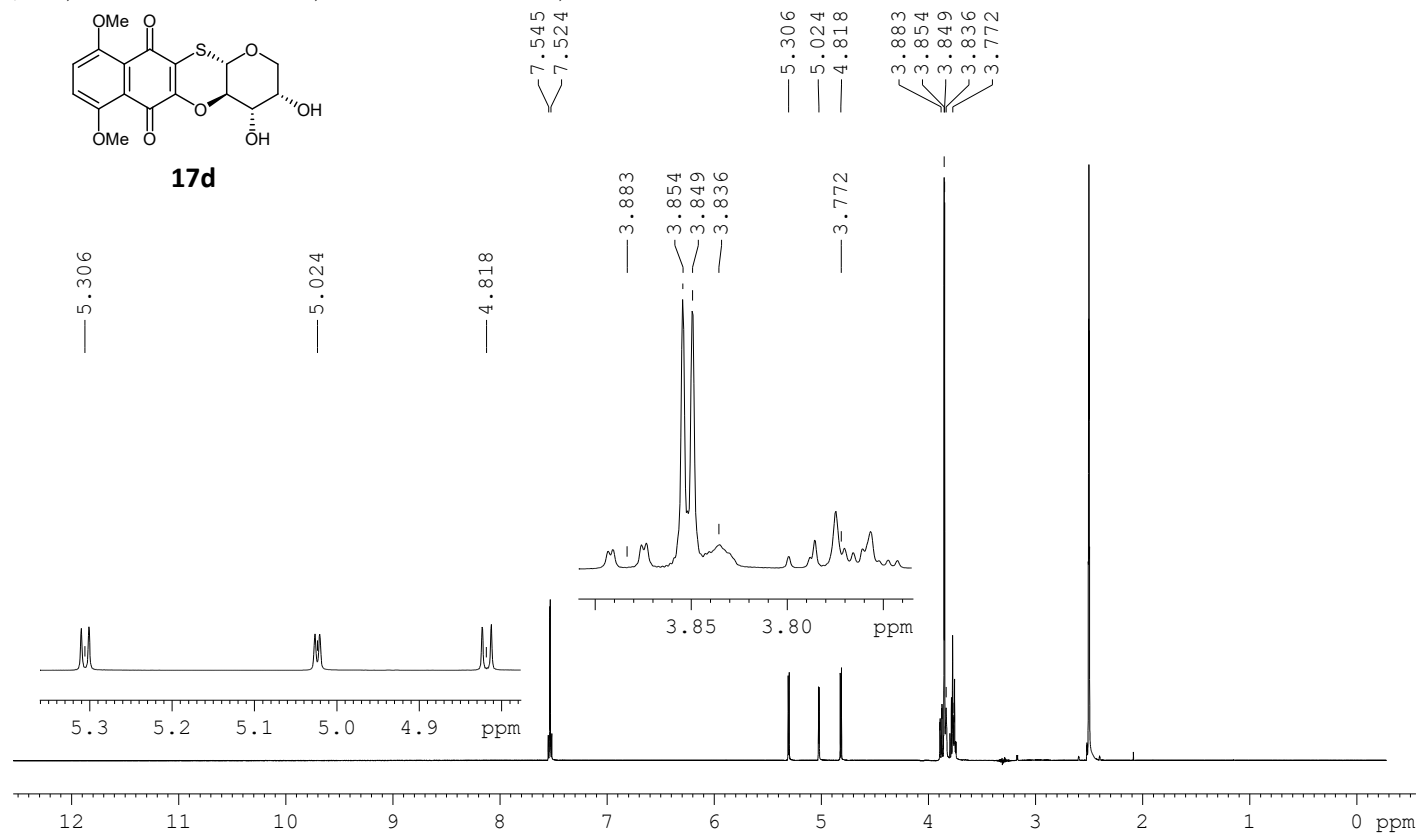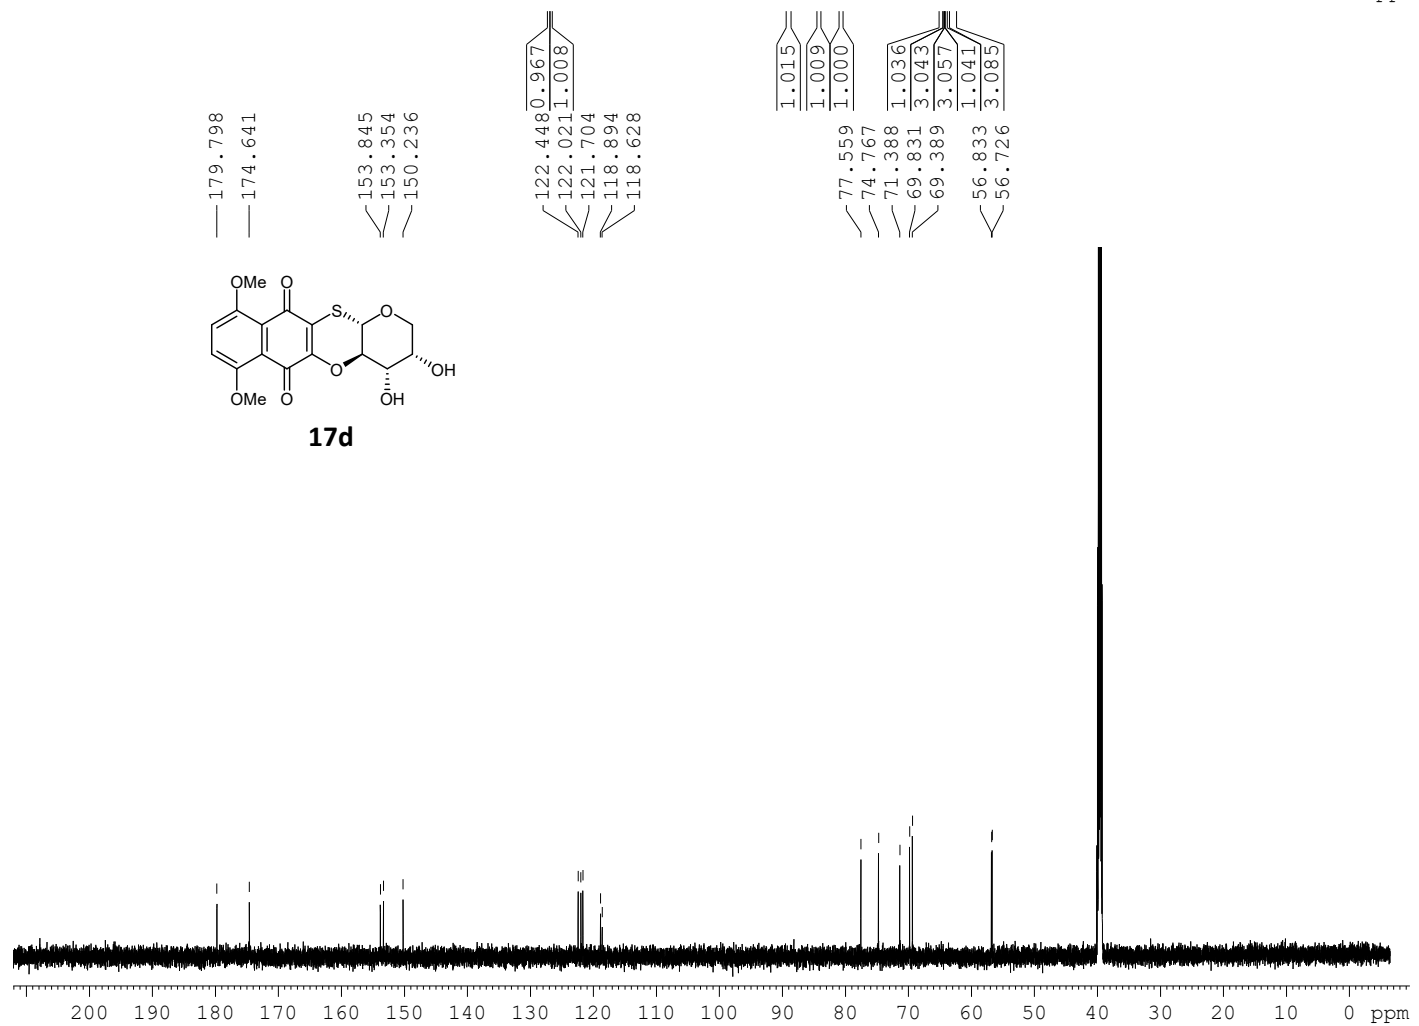

(2*R*,3*S*,4*S*,4*aR*,12*aS*)-8,9-Dichloro-3,4-dihydroxy-2-hydroxymethyl-7,10-dimethoxy-3,4,4*a*,12*a*-tetrahydro-2*H*-naphtho[2,3-*b*]pyrano[2,3-*e*][1,4]oxathiine-6,11-dione (**18a**), (<sup>1</sup>H NMR - 500 MHz, <sup>13</sup>C NMR - 125 MHz, solvent - DMSO-*d*<sub>6</sub>)

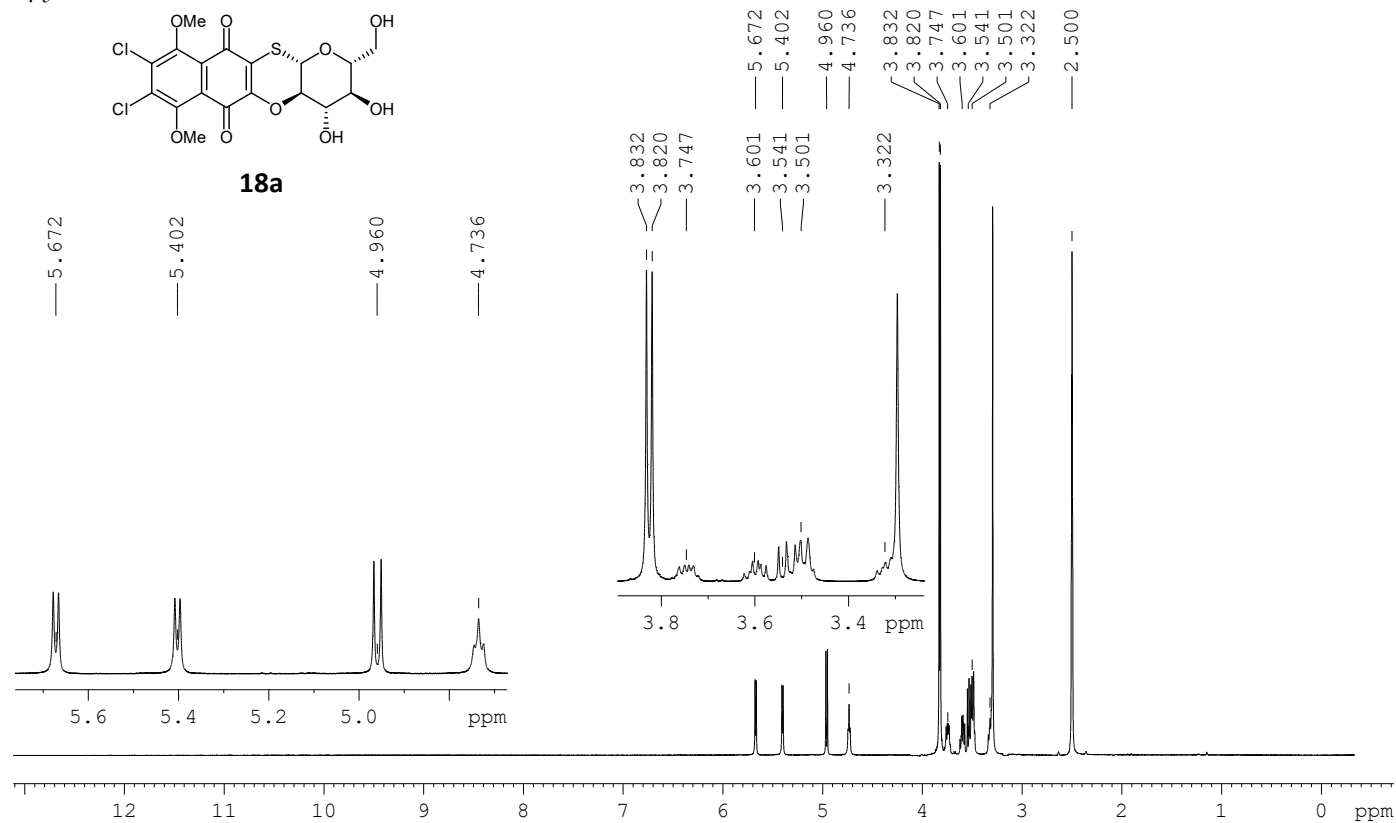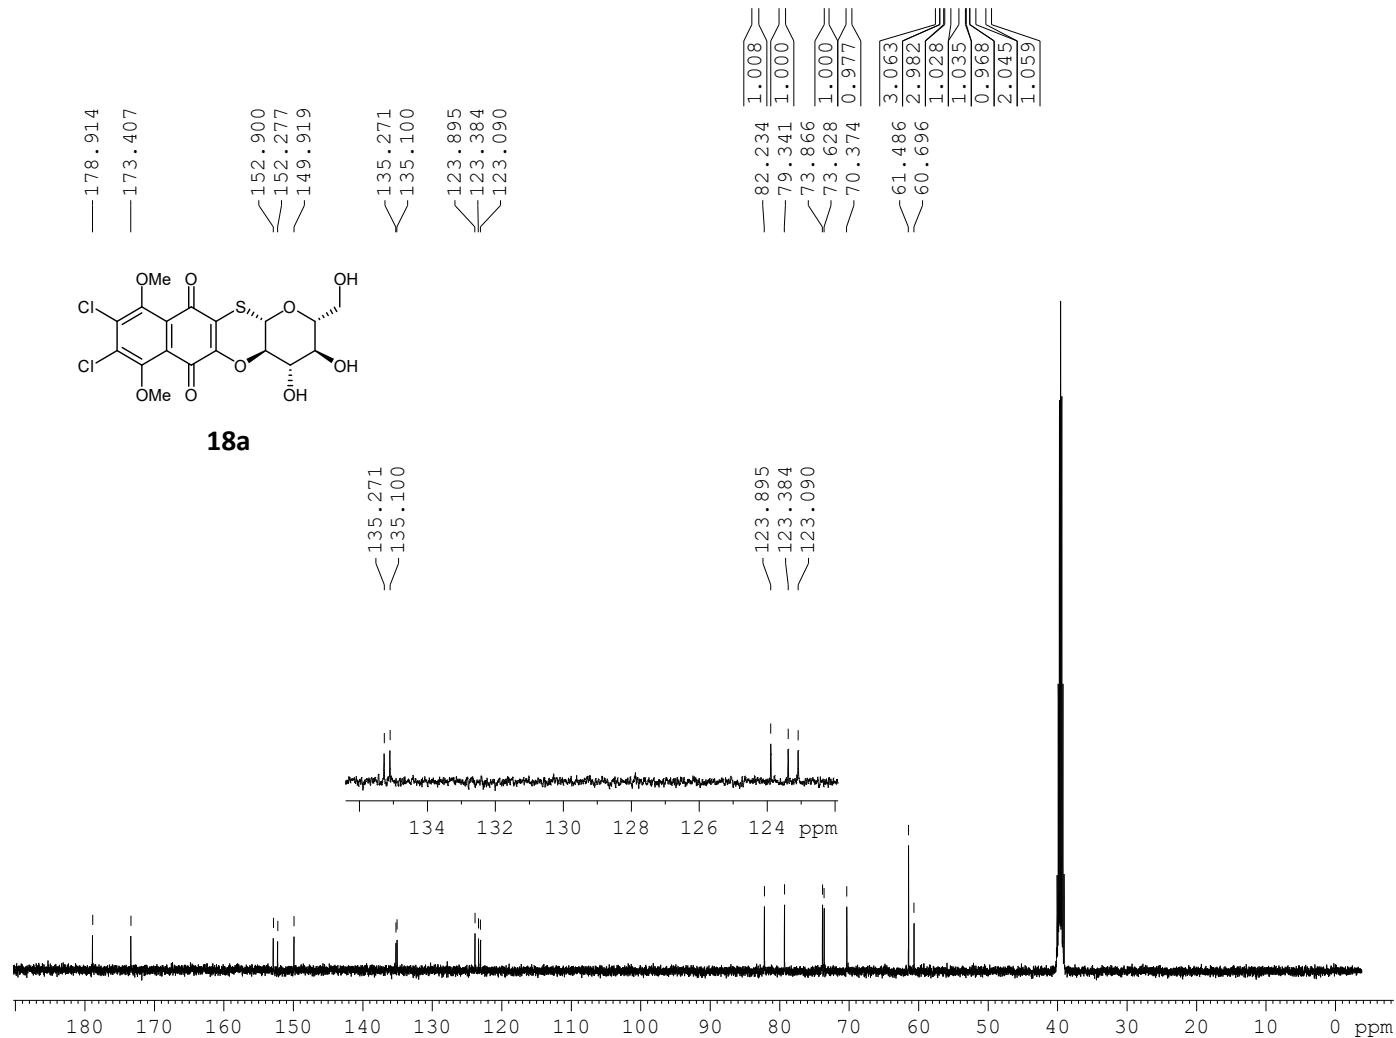

(2R,3R,4S,4aR,12aS)-8,9-Dichloro-3,4-dihydroxy-2-(hydroxymethyl)-7,10-dimethoxy-3,4,4a,12a-tetrahydro-2H-naphtho[2,3-b]pyrano[2,3-e][1,4]oxathiine-6,11-dione (**18b**), (<sup>1</sup>H NMR - 700 MHz, <sup>13</sup>C NMR - 176 MHz, solvent - DMSO-d<sub>6</sub>)

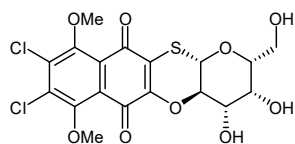

**18b**

— 5.401  
 — 4.925  
 — 4.803  
 — 3.849  
 — 3.828  
 — 3.820  
 — 3.791  
 — 3.754  
 — 3.560  
 — 2.500

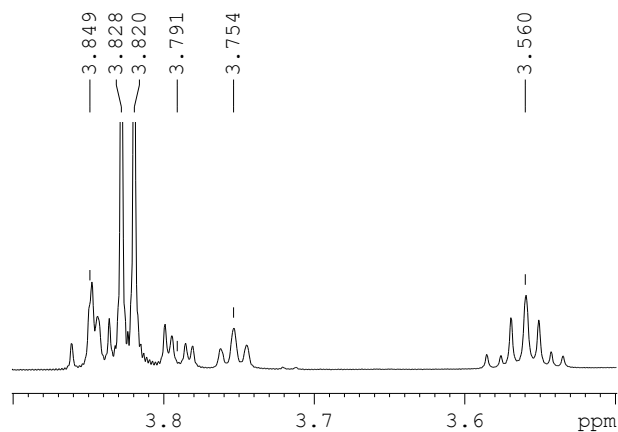

12 11 10 9 8 7 6 5 4 3 2 1 0 ppm

— 178.872  
 — 173.414  
 — 152.877  
 — 152.272  
 — 150.473  
 — 135.215  
 — 135.071  
 — 123.920  
 — 123.391  
 — 123.157

— 1.027  
 — 1.000  
 — 1.950  
 — 2.029  
 — 3.035  
 — 3.033  
 — 1.032  
 — 0.999  
 — 2.043

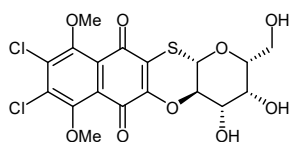

**18b**

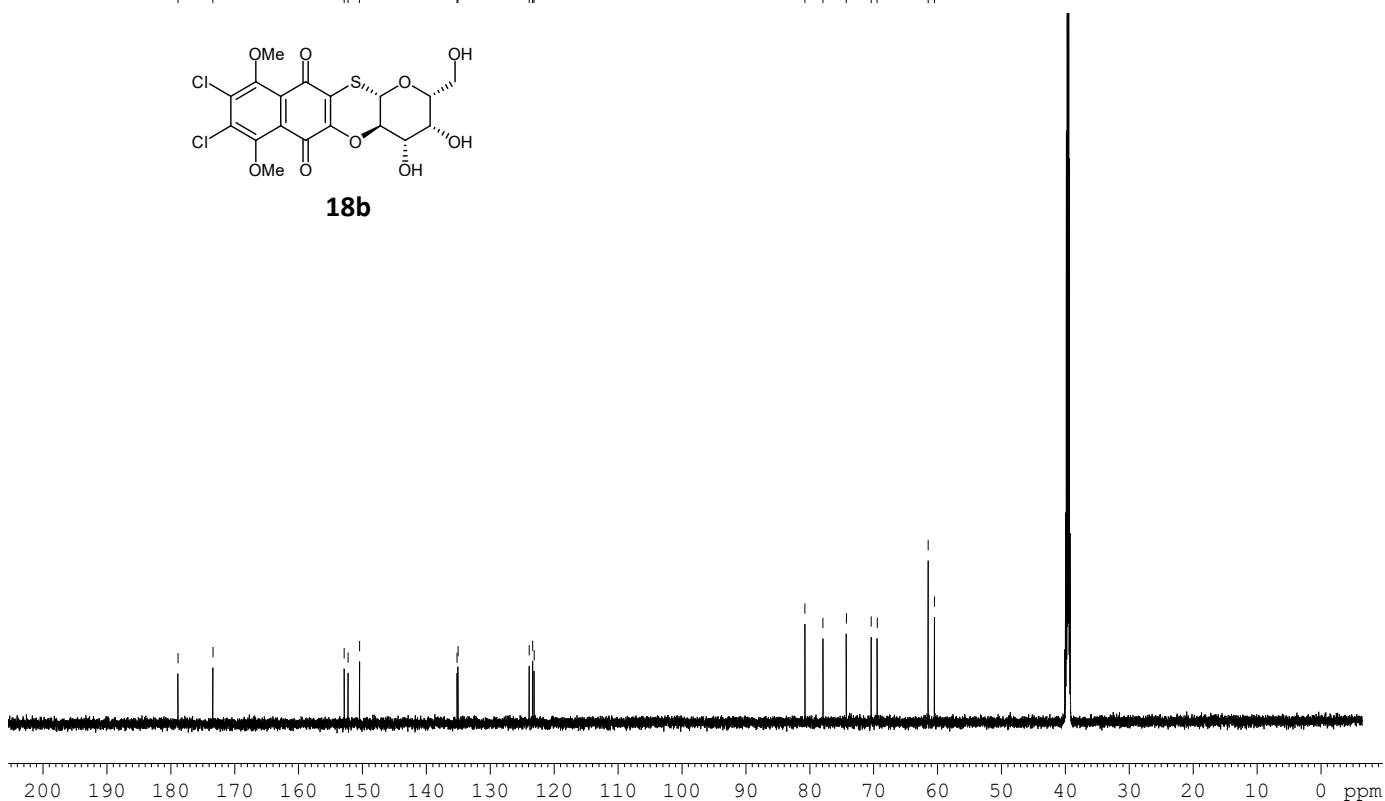

(3*R*,4*S*,4*aR*,12*aS*)-8,9-Dichloro-3,4-dihydroxy-7,10-dimethoxy-3,4,4*a*,12*a*-tetrahydro-2*H*-naphtho[2,3-*b*]pyrano[2,3-*e*][1,4]oxathiine-6,11-dione (**18c**), (<sup>1</sup>H NMR - 700 MHz, <sup>13</sup>C NMR - 176 MHz, solvent - DMSO-*d*<sub>6</sub>)

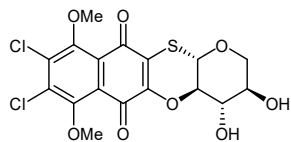

**18c**

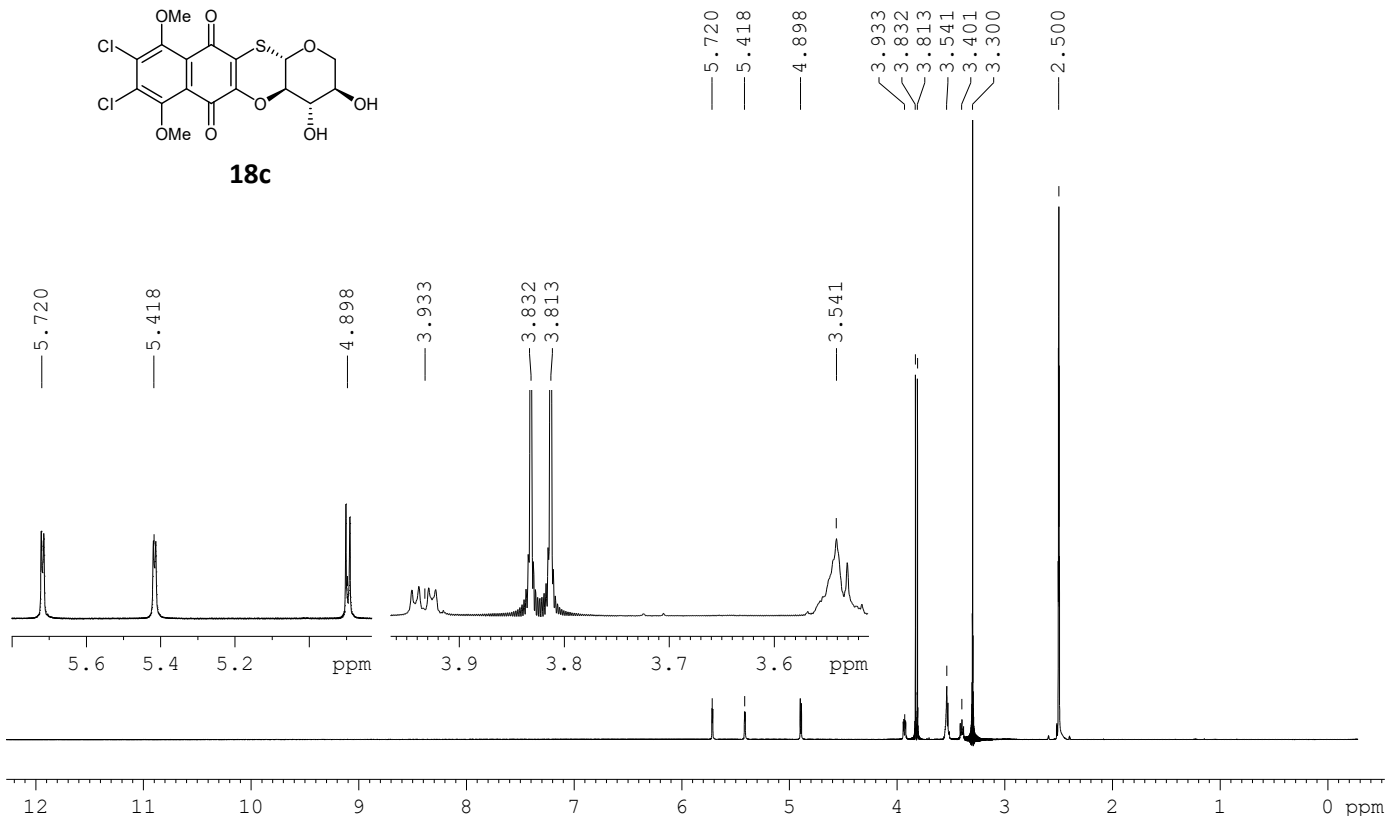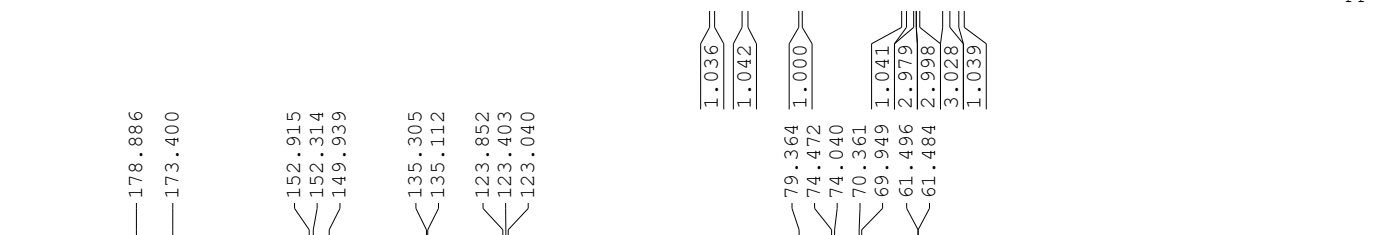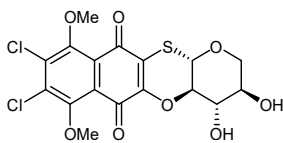

**18c**

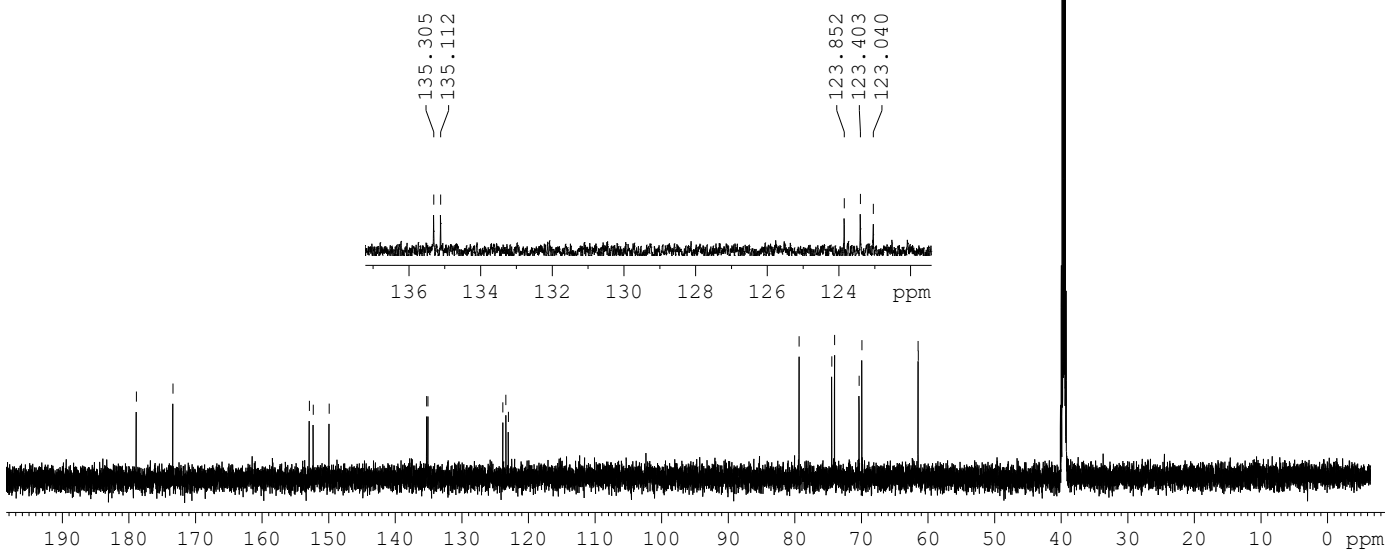



(3*S*,4*S*,4*aR*,12*aS*)-8,9-Dichloro-3,4-dihydroxy-7,10-dimethoxy-3,4,4*a*,12*a*-tetrahydro-2*H*-naphtho[2,3-*b*]pyrano[2,3-*e*][1,4]oxathiine-6,11-dione (**18d**), (<sup>1</sup>H NMR - 500 MHz, <sup>13</sup>C NMR - 125 MHz, solvent - DMSO-*d*<sub>6</sub>)

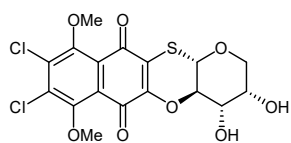

**18d**

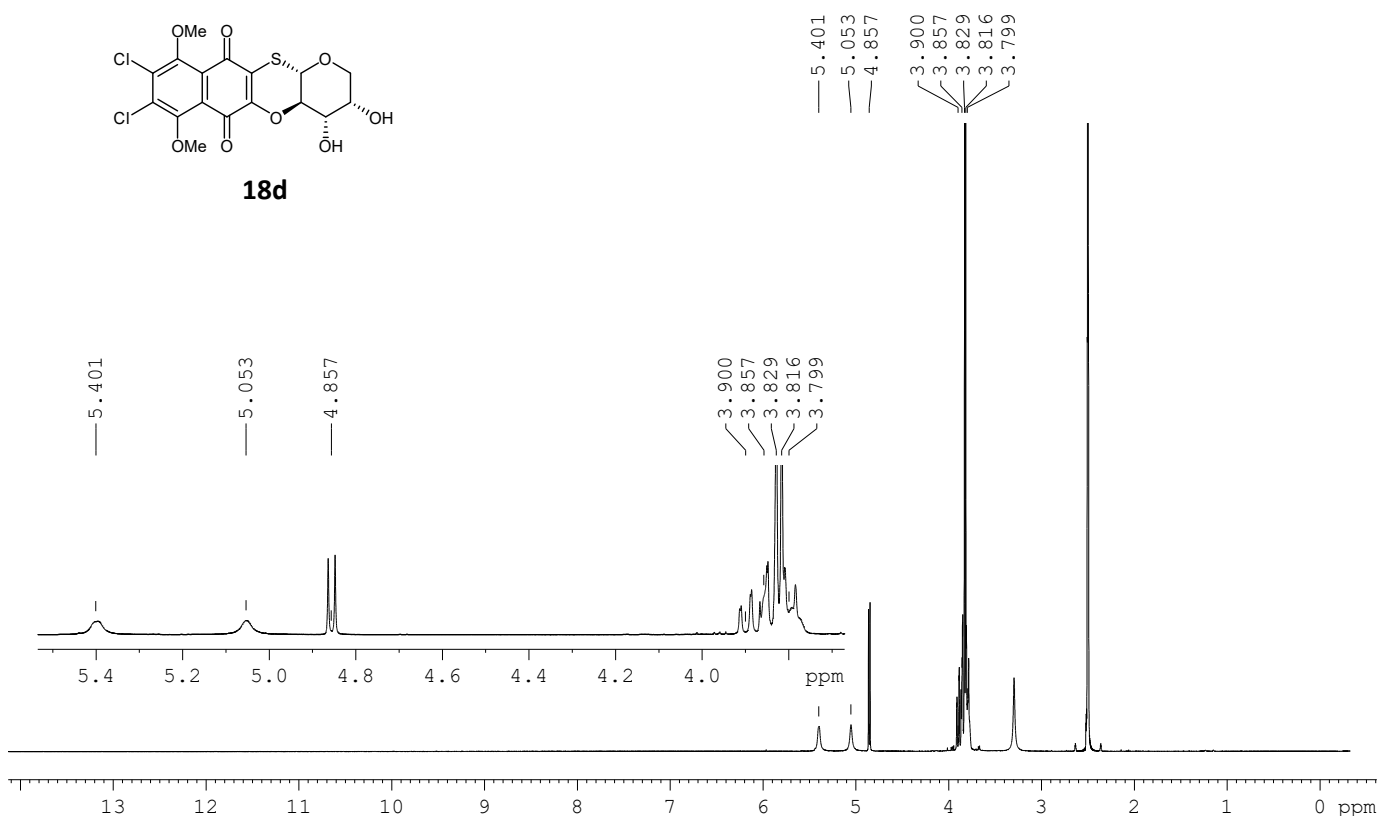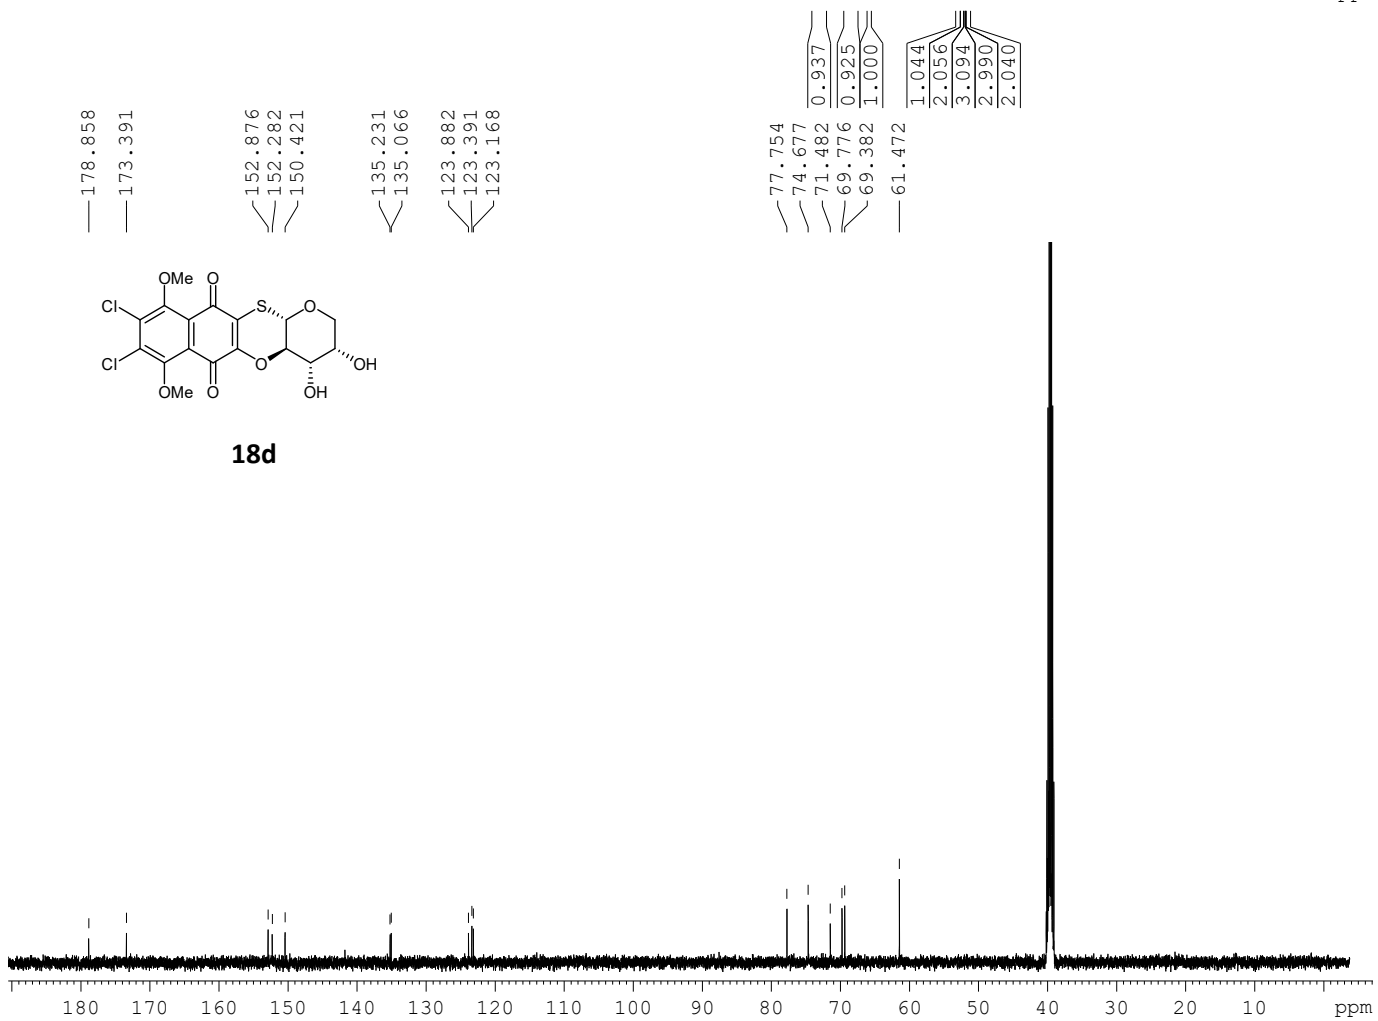

(2*R*,3*S*,4*S*,4*aR*,12*aS*)-3,4,10-Trihydroxy-2-hydroxymethyl-3,4,4*a*,12*a*-tetrahydro-2*H*-naphtho[2,3-*b*]pyrano[2,3-*e*][1,4]oxathiine-6,11-dione (**19a**), (<sup>1</sup>H NMR - 700 MHz, <sup>13</sup>C NMR - 176 MHz, solvent - DMSO-*d*<sub>6</sub>)

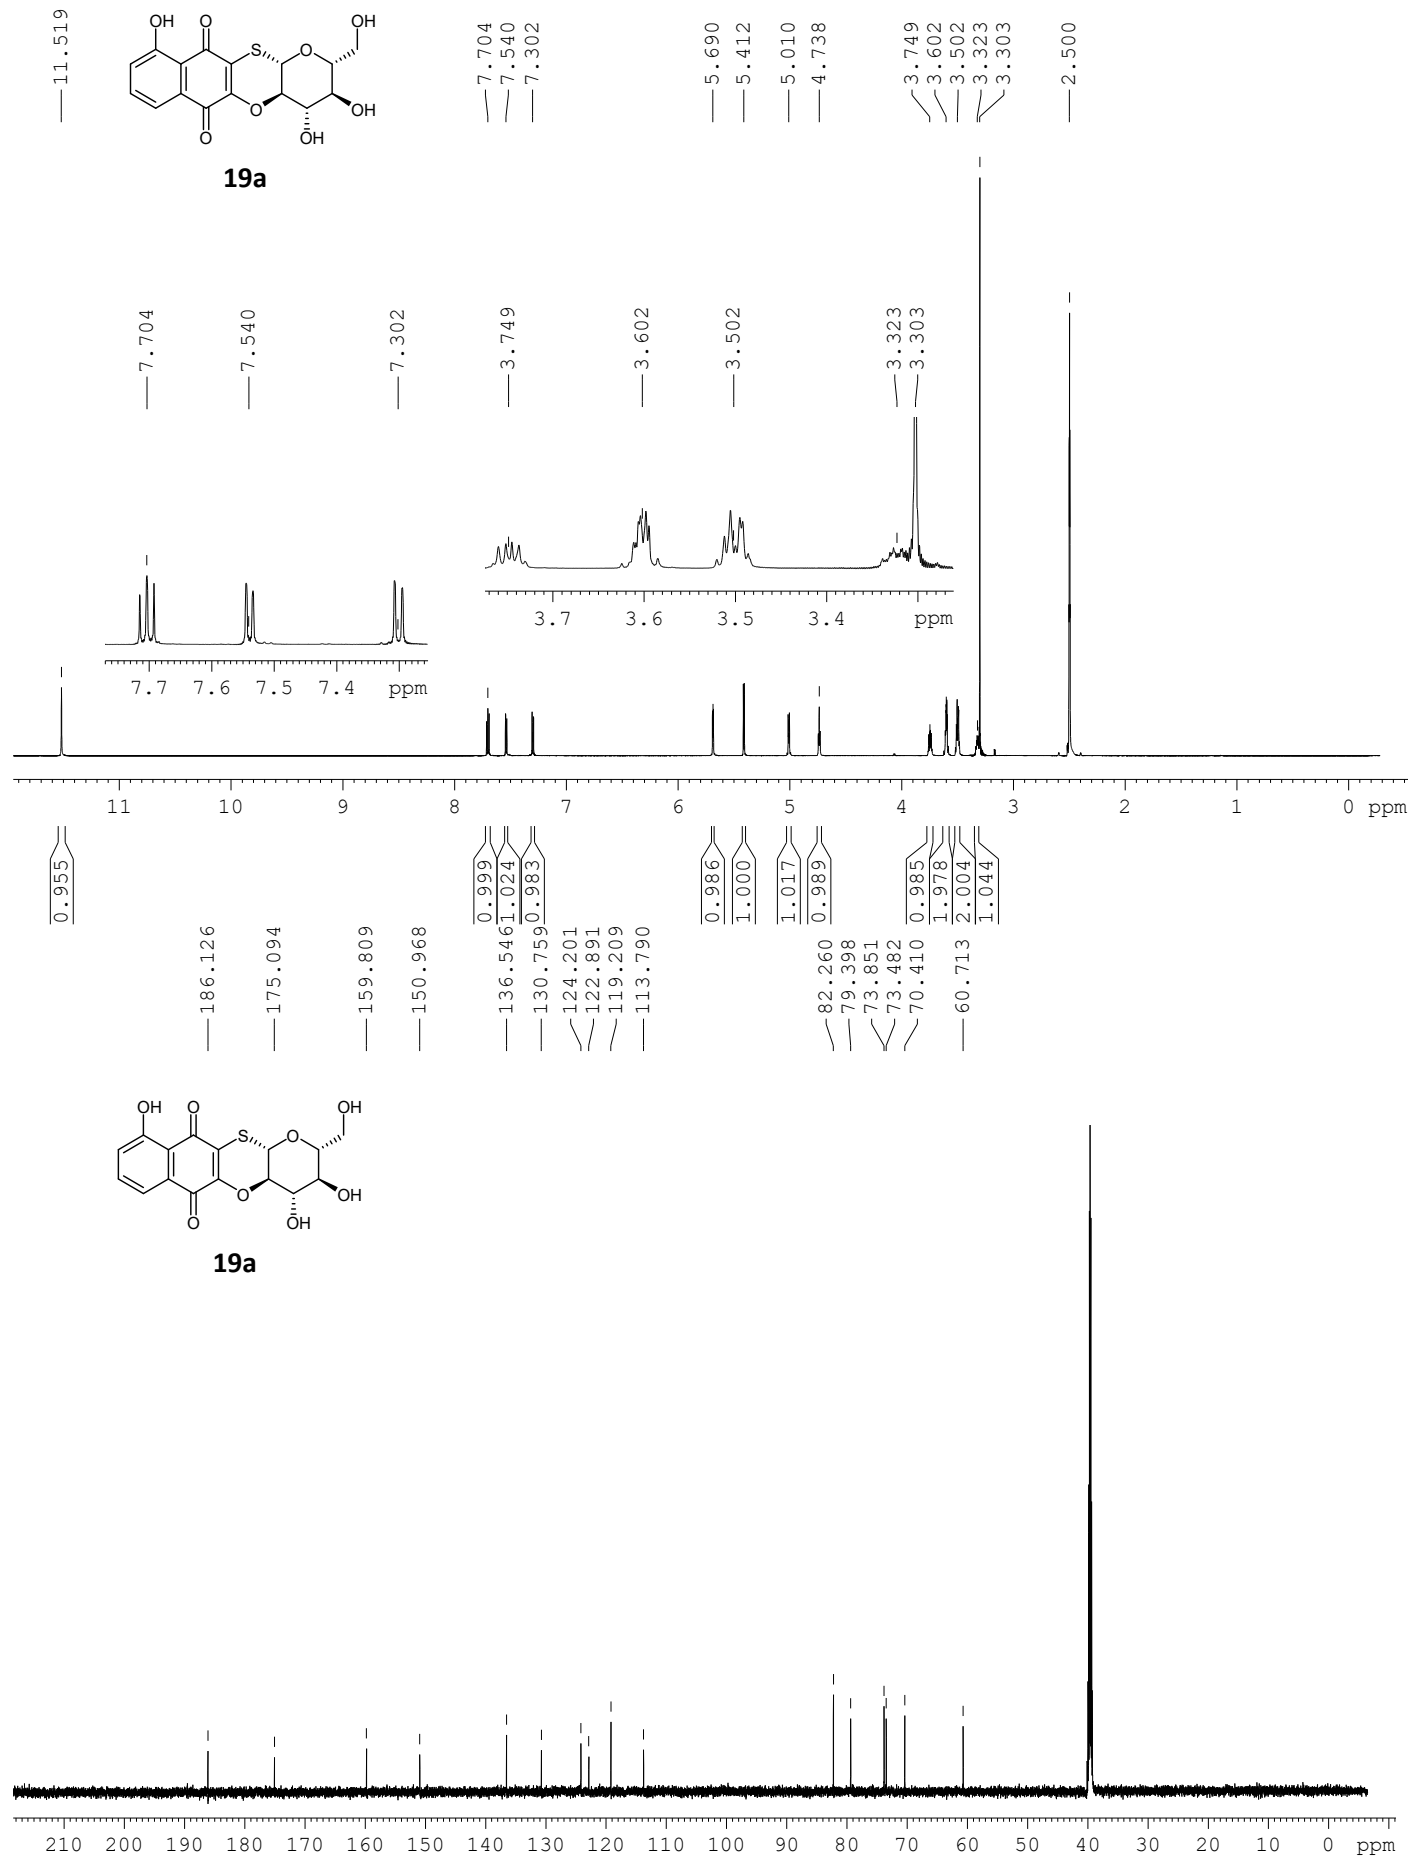

(2R,3R,4S,4aR,12aS)-3,4,10-Trihydroxy-2-hydroxymethyl-3,4,4a,12a-tetrahydro-2H-naphtho[2,3-b]pyrano-[2,3-e][1,4]oxathiine-6,11-dione (**19b**), ( $^1\text{H}$  NMR - 500 MHz,  $^{13}\text{C}$  NMR - 125 MHz, solvent - DMSO- $d_6$ )

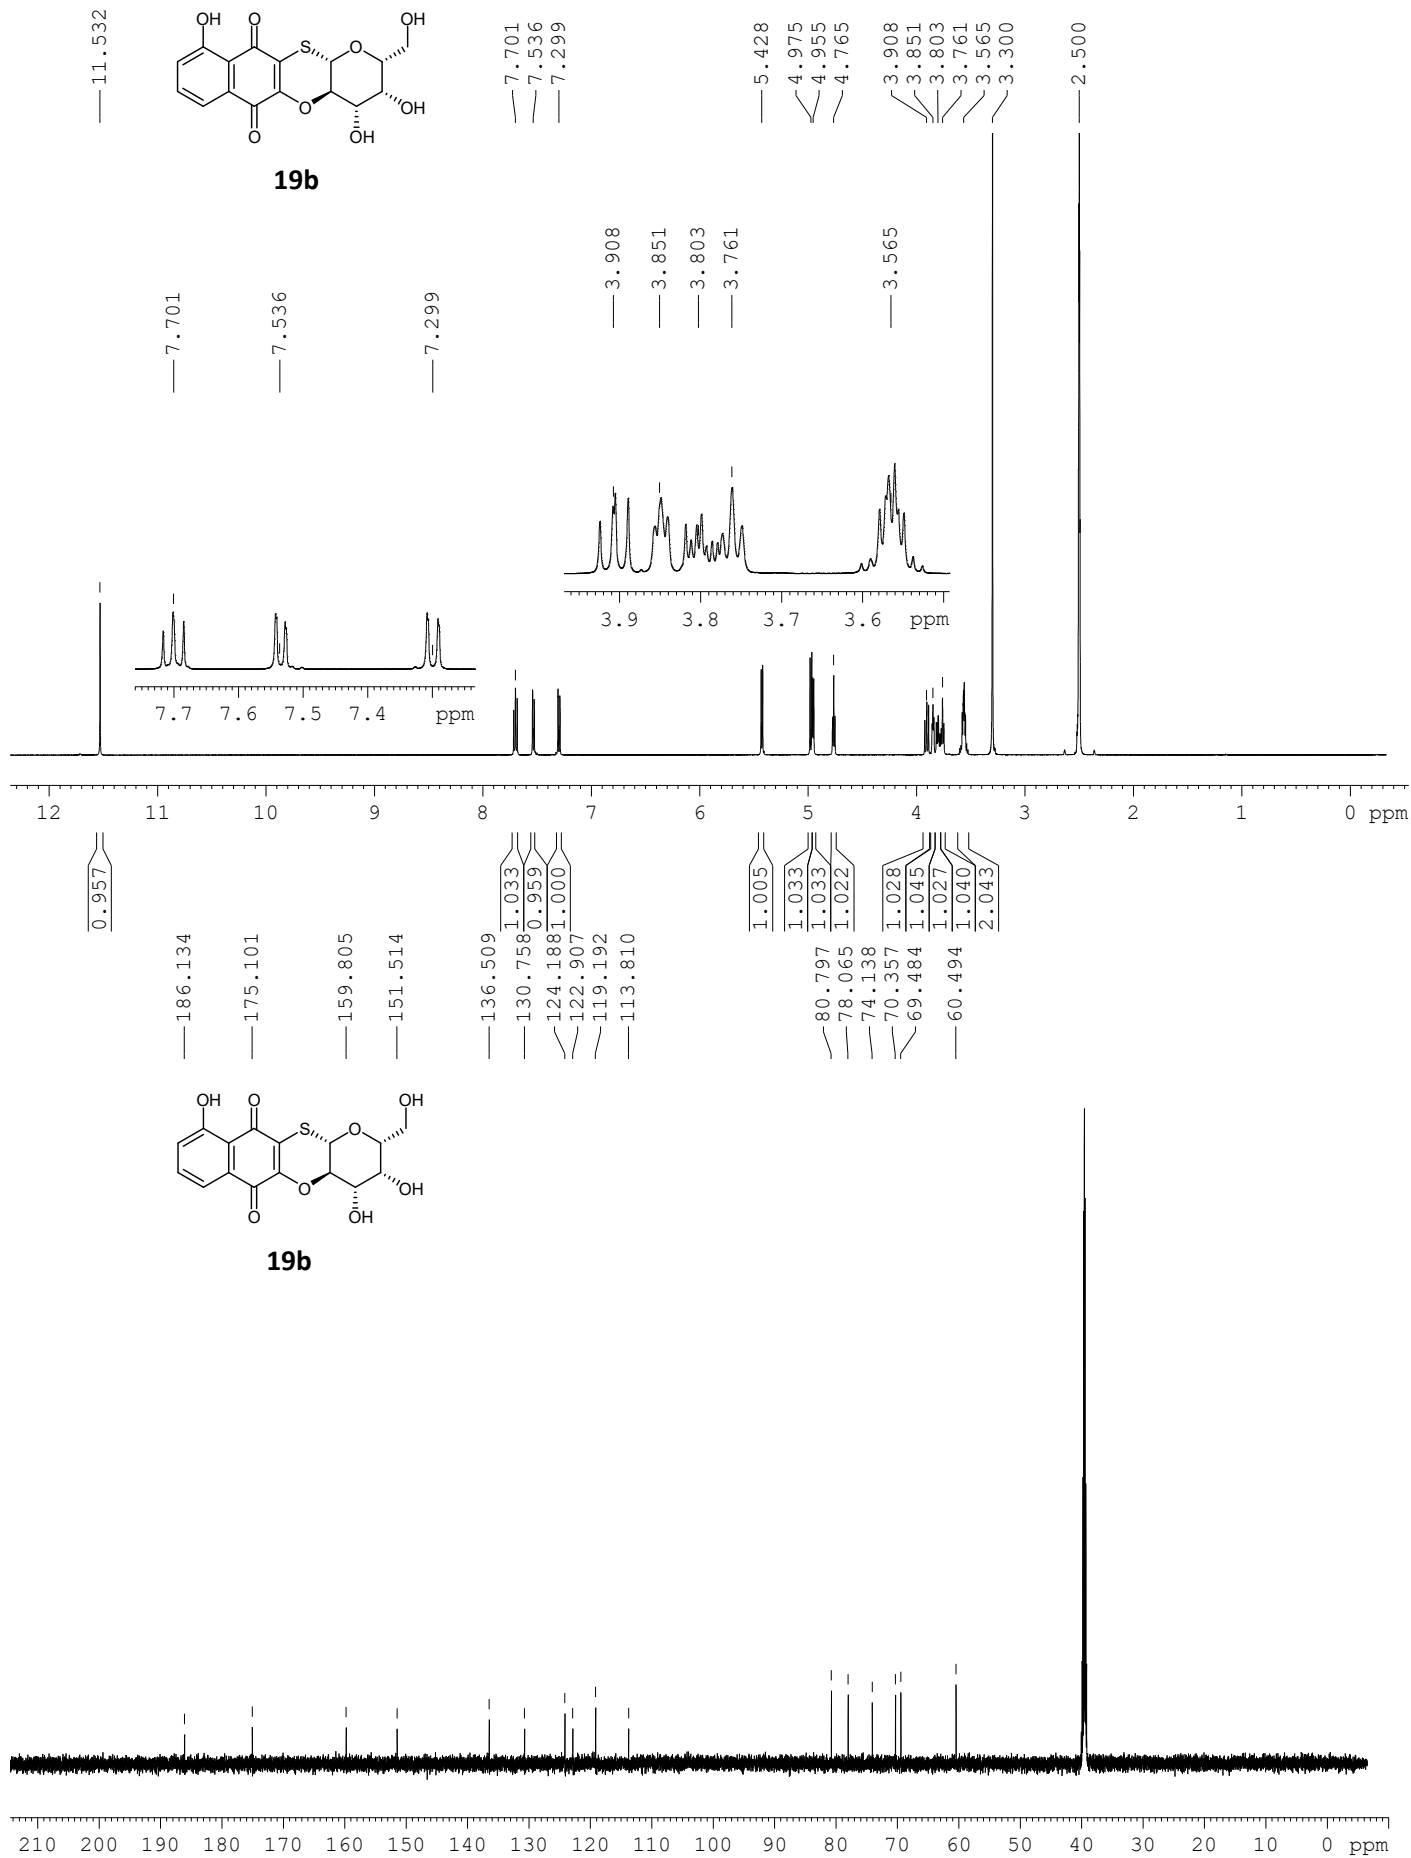

(3*R*,4*S*,4*aR*,12*aS*)-3,4,10-Trihydroxy-3,4,4*a*,12*a*-tetrahydro-2*H*-naphtho[2,3-*b*]pyrano[2,3-*e*][1,4]oxathiine-6,11-dione (**19c**), (<sup>1</sup>H NMR - 700 MHz, <sup>13</sup>C NMR - 176 MHz, solvent - DMSO-*d*<sub>6</sub>)

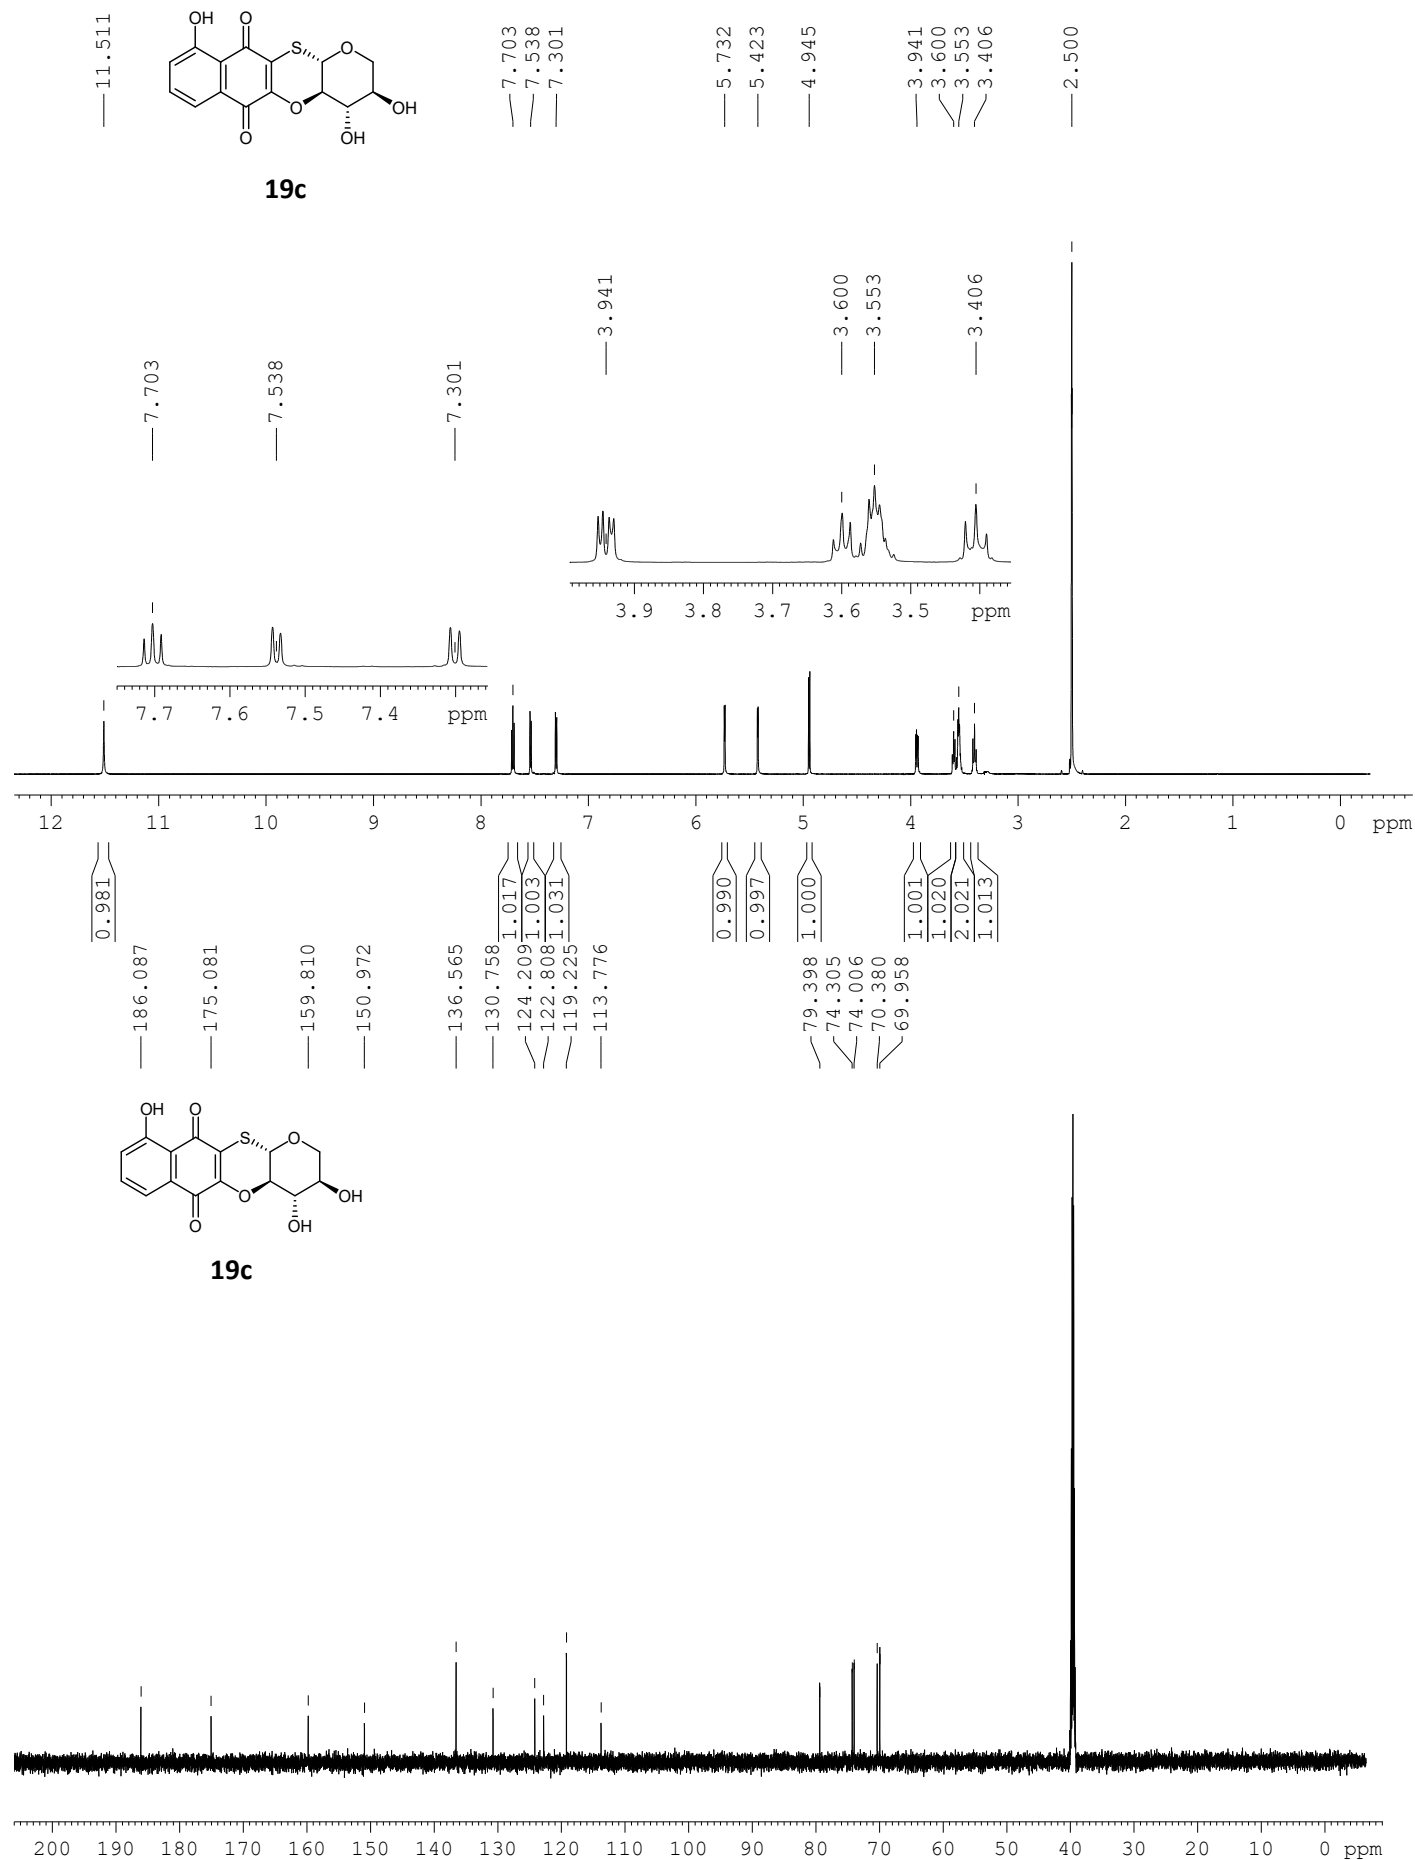

(3*S*,4*S*,4*aR*,12*aS*)-3,4,10-Trihydroxy-3,4,4*a*,12*a*-tetrahydro-2*H*-naphtho[2,3-*b*]pyrano[2,3-*e*][1,4]oxathiine-6,11-dione (**19d**), (<sup>1</sup>H NMR - 500 MHz, <sup>13</sup>C NMR - 125 MHz, solvent - DMSO-*d*<sub>6</sub>)

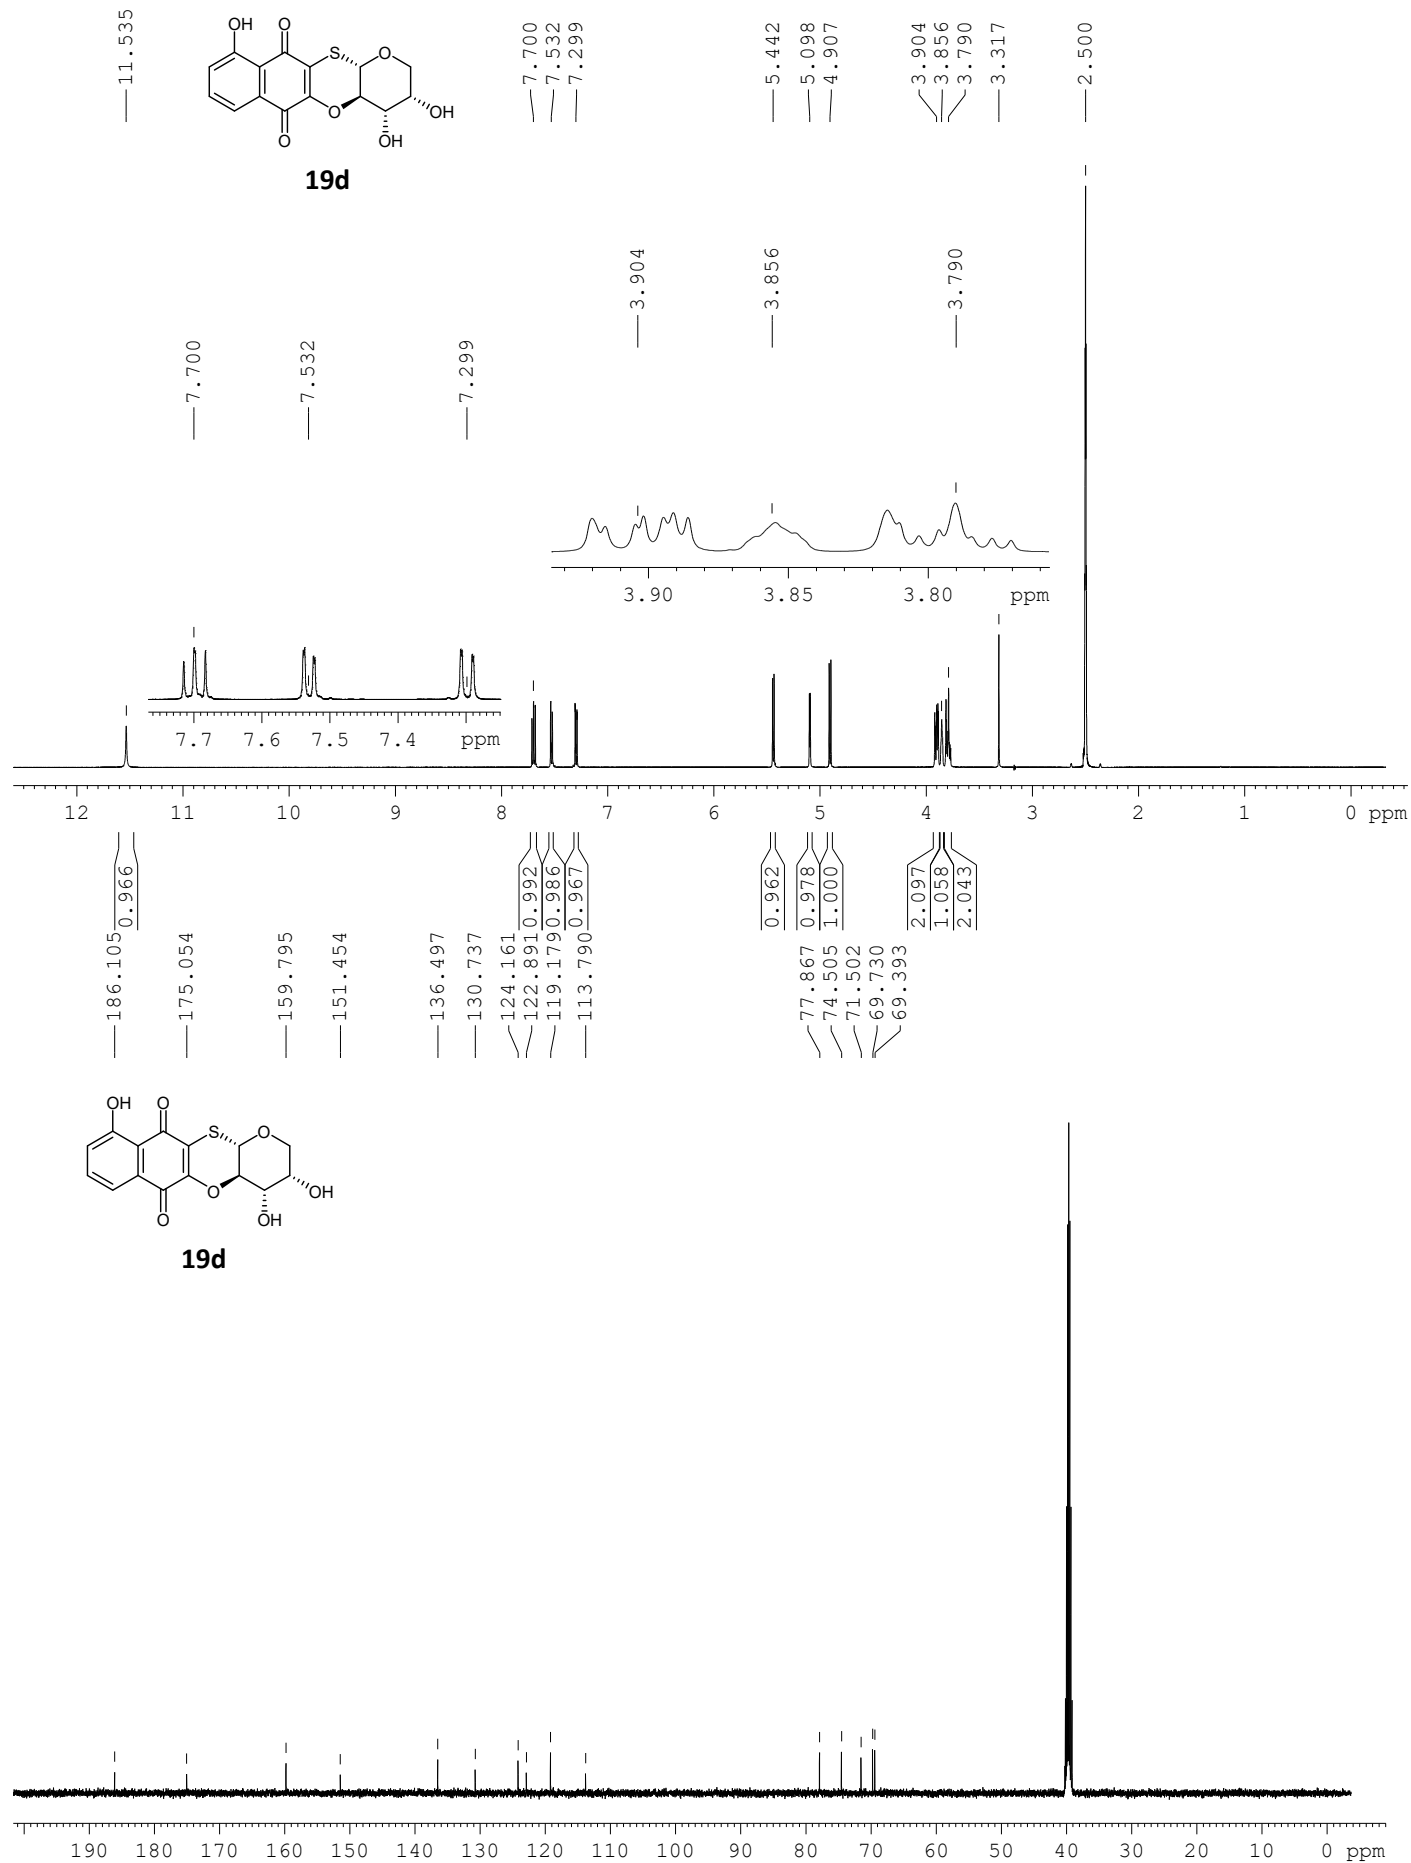

(2*R*,3*S*,4*S*,4*aR*,12*aS*)-3,4,7-Trihydroxy-2-(hydroxymethyl)-3,4,4*a*,12*a*-tetrahydro-2*H*-naphtho[2,3-*b*]pyrano-[2,3-*e*][1,4]oxathiine-6,11-dione (**20a**), (<sup>1</sup>H NMR - 700 MHz, <sup>13</sup>C NMR - 176 MHz, solvent - DMSO-*d*<sub>6</sub>)

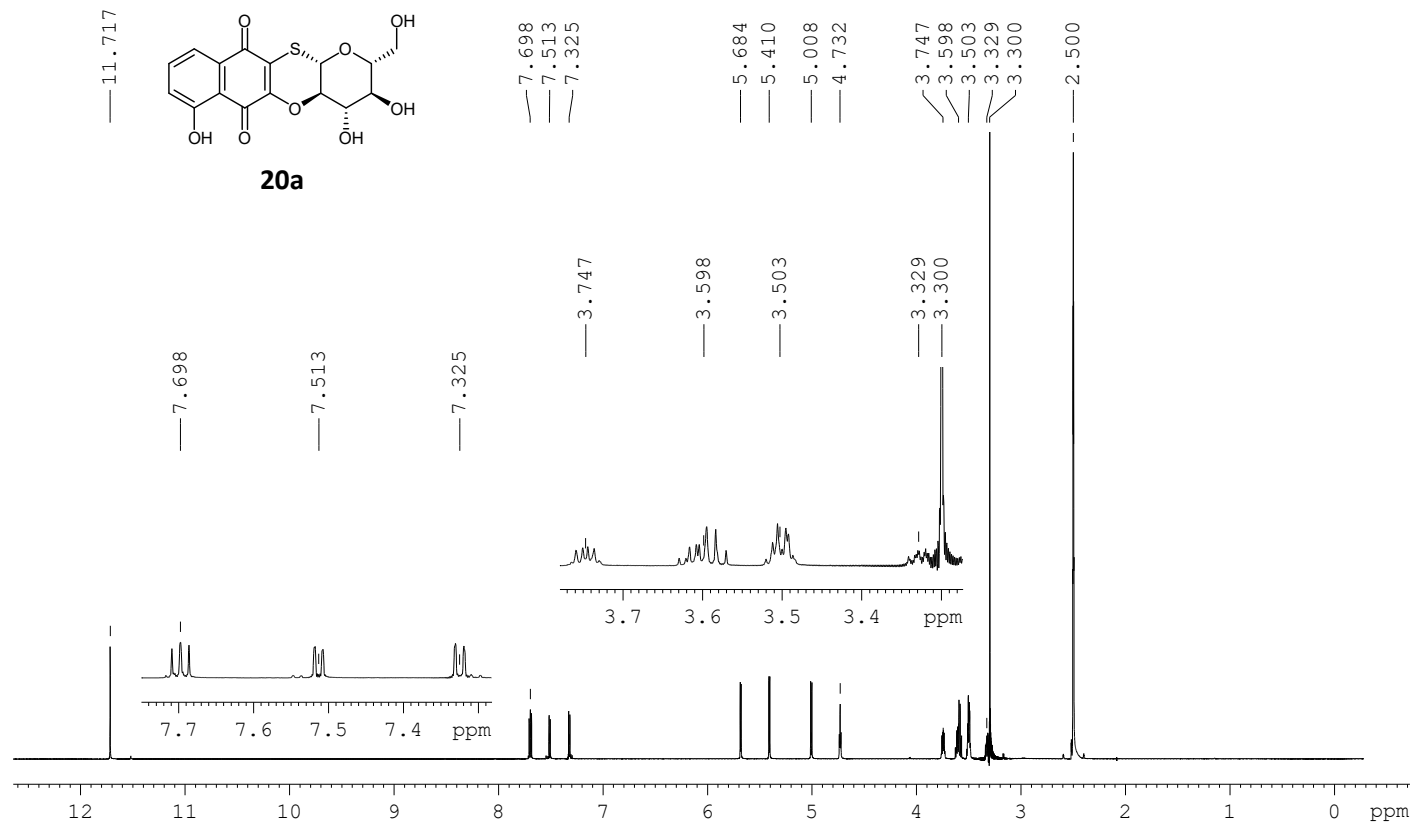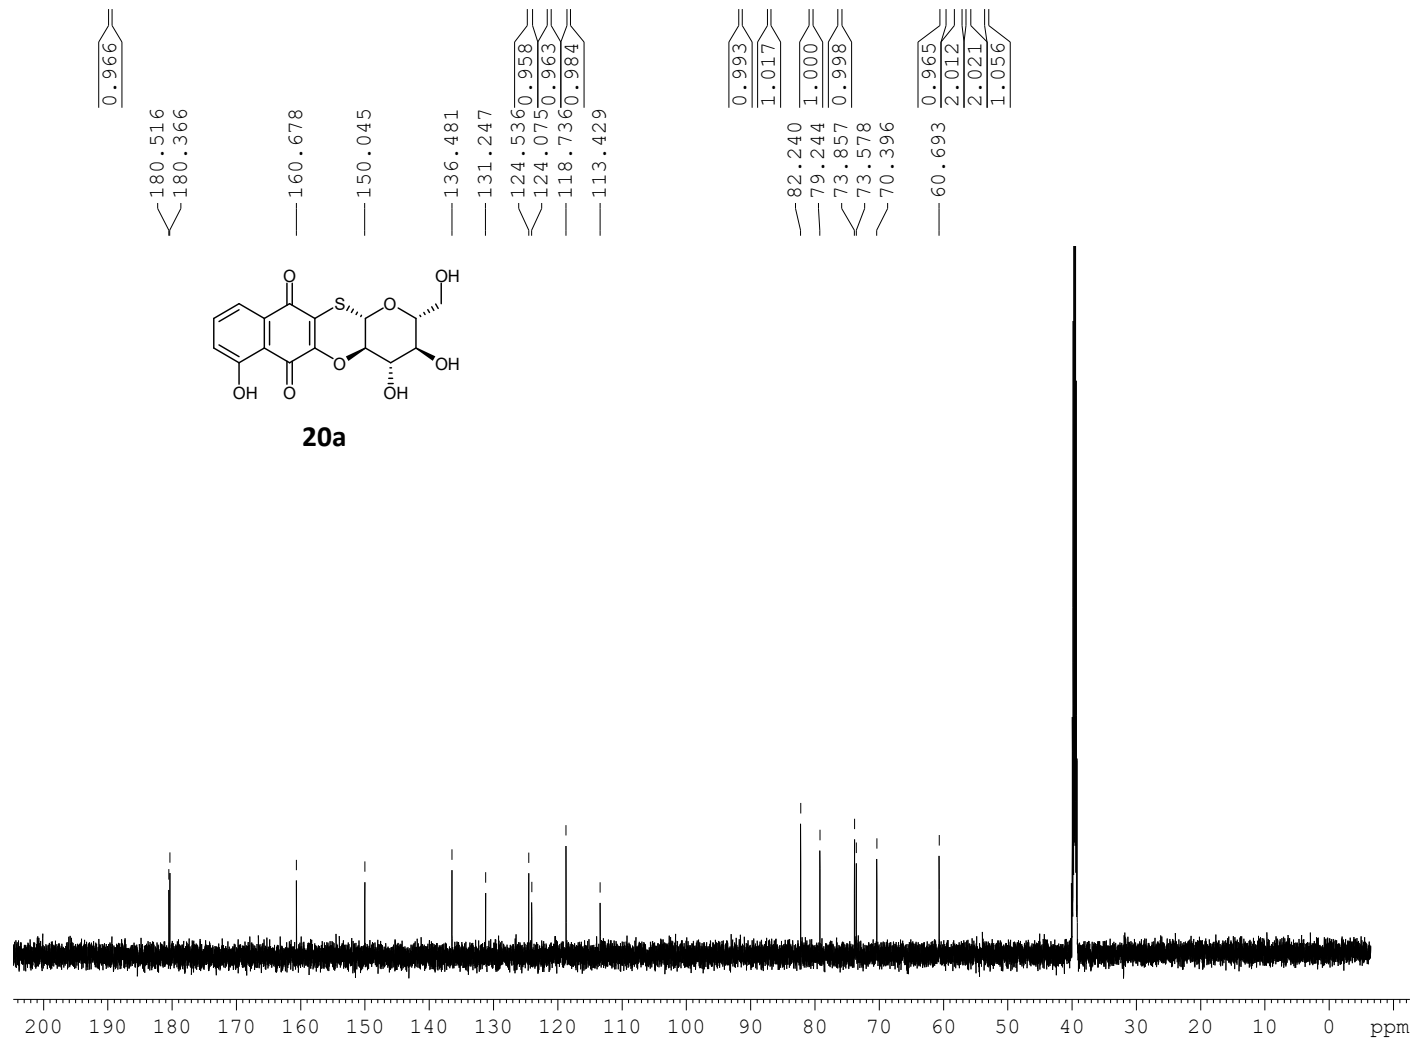

(2R,3R,4S,4aR,12aS)-3,4,7-Trihydroxy-2-hydroxymethyl-3,4,4a,12a-tetrahydro-2H-naphtho[2,3-b]pyrano[2,3-e][1,4]oxathine-6,11-dione (**20b**), ( $^1\text{H}$  NMR - 500 MHz,  $^{13}\text{C}$  NMR - 125 MHz, solvent - DMSO- $d_6$ )

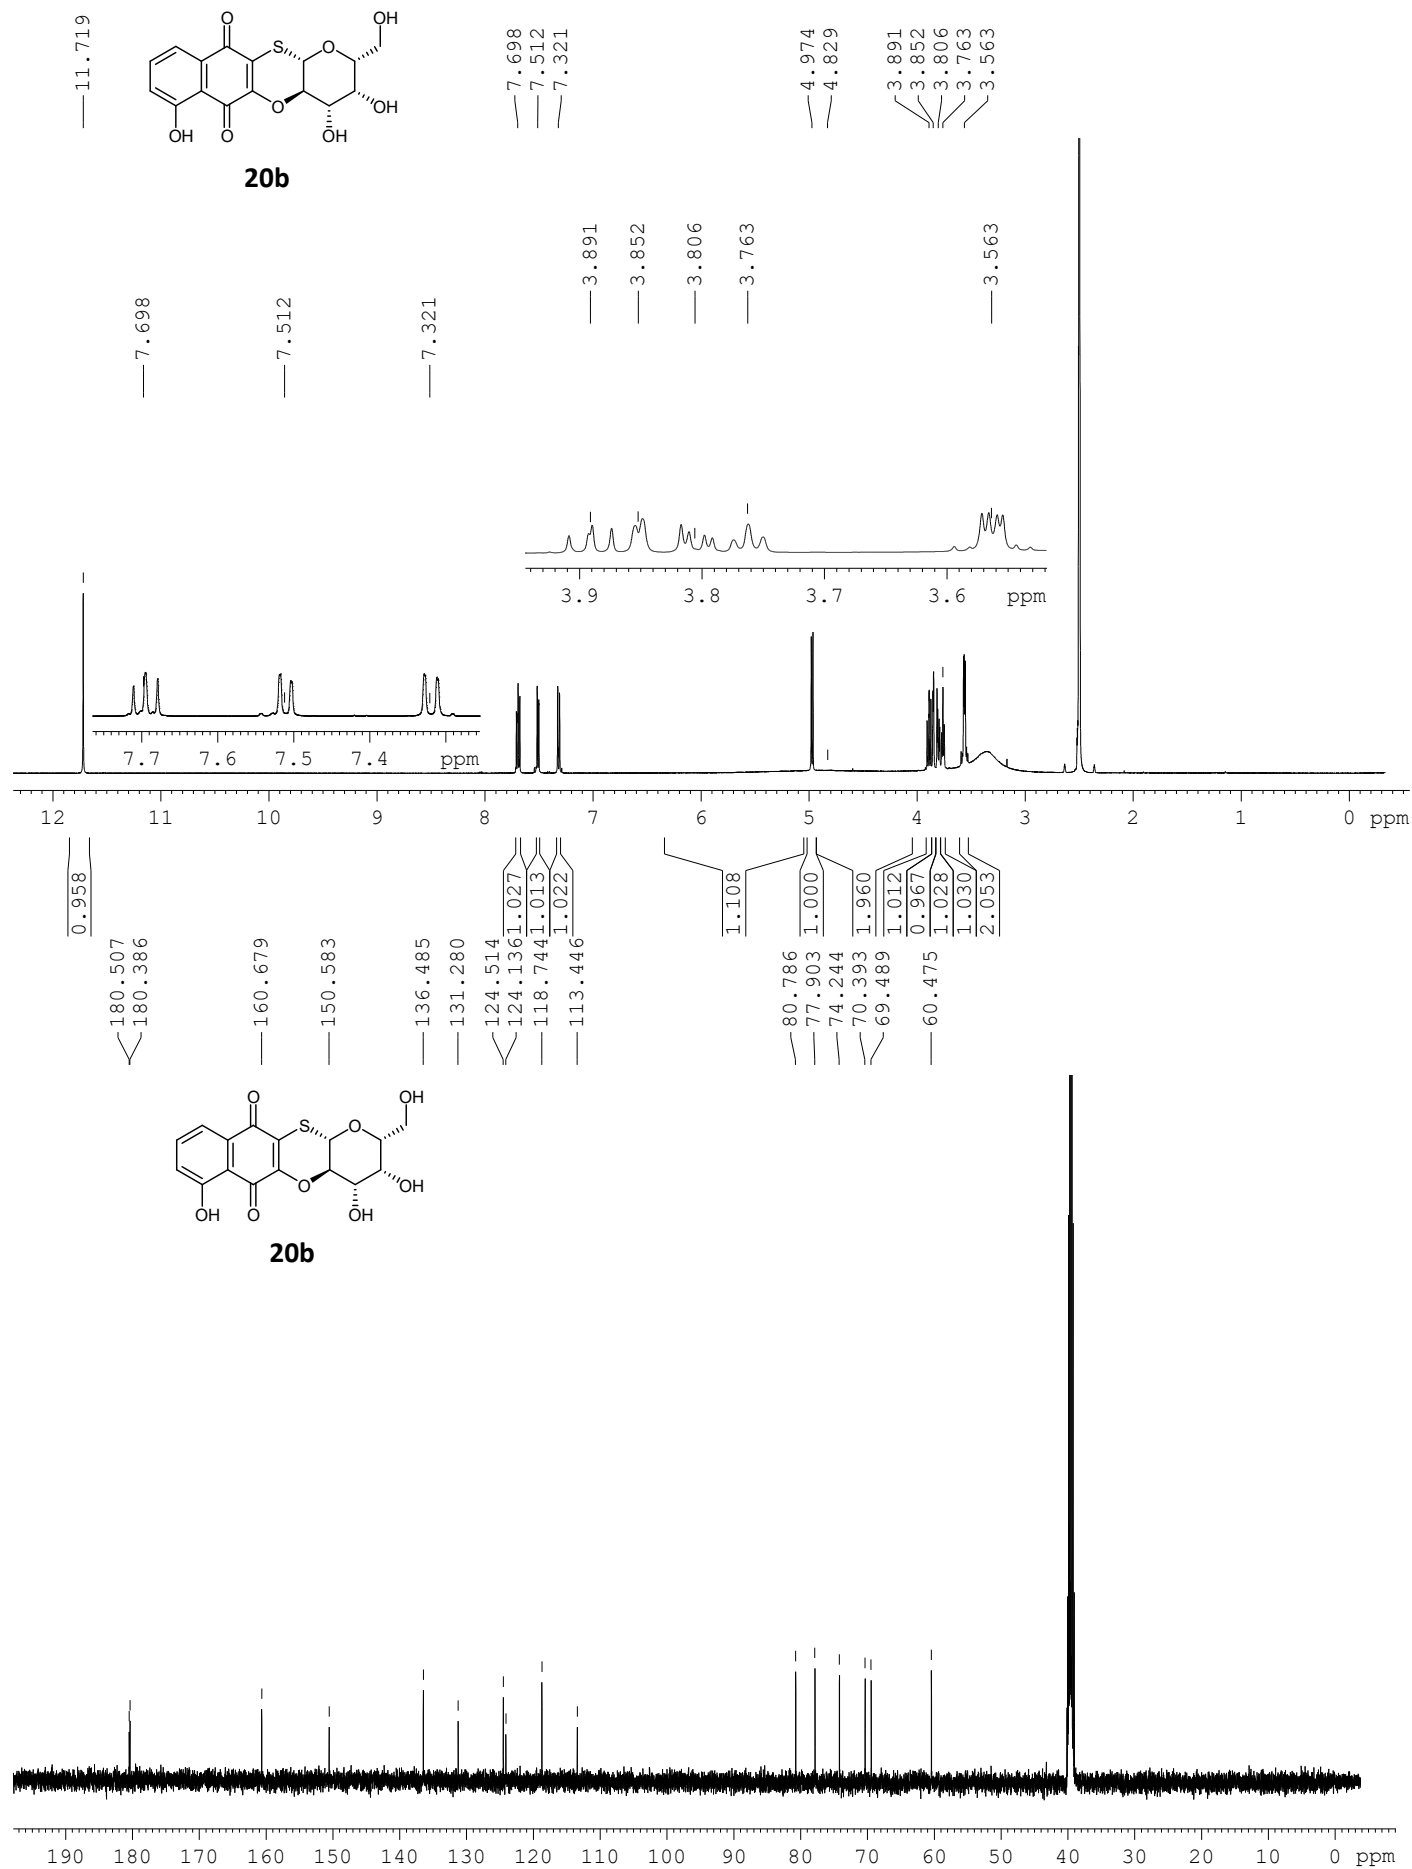

(3*R*,4*S*,4*aR*,12*aS*)-3,4,7-Trihydroxy-3,4,4*a*,12*a*-tetrahydro-2*H*-naphtho[2,3-*b*]pyrano[2,3-*e*][1,4]oxathiine-6,11-dione (**20c**), (<sup>1</sup>H NMR - 500 MHz, <sup>13</sup>C NMR - 125 MHz, solvent - DMSO-*d*<sub>6</sub>)

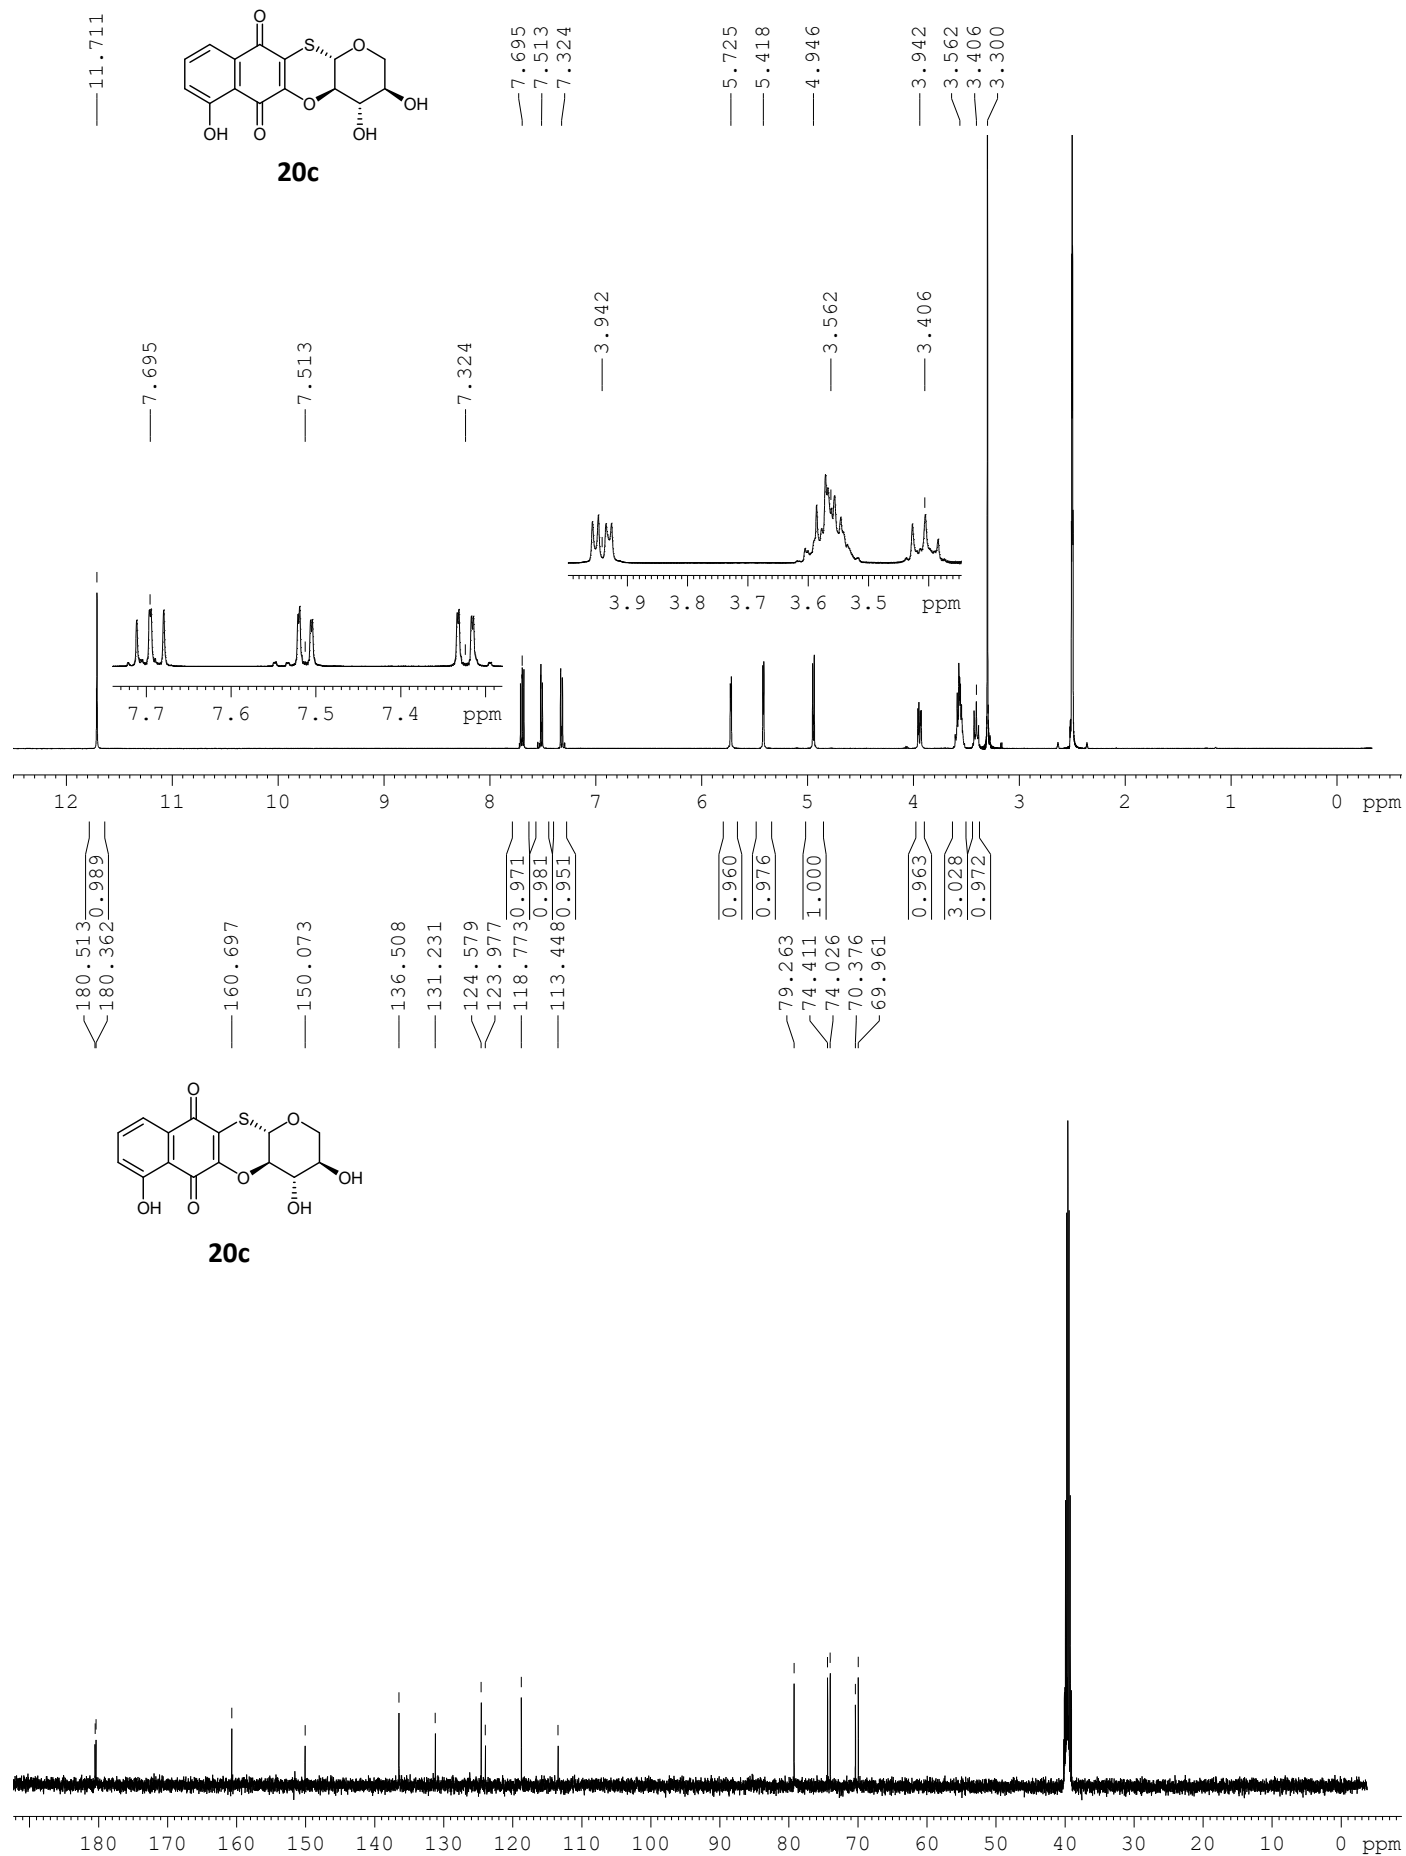



(3*S*,4*S*,4*a**R*,12*a**S*)-3,4,7-Trihydroxy-3,4,4*a*,12*a*-tetrahydro-2*H*-naphtho[2,3-*b*]pyrano[2,3-*e*][1,4]oxathiine-6,11-dione (**20d**), (<sup>1</sup>H NMR - 500 MHz, <sup>13</sup>C NMR - 125 MHz, solvent - DMSO-*d*<sub>6</sub>)

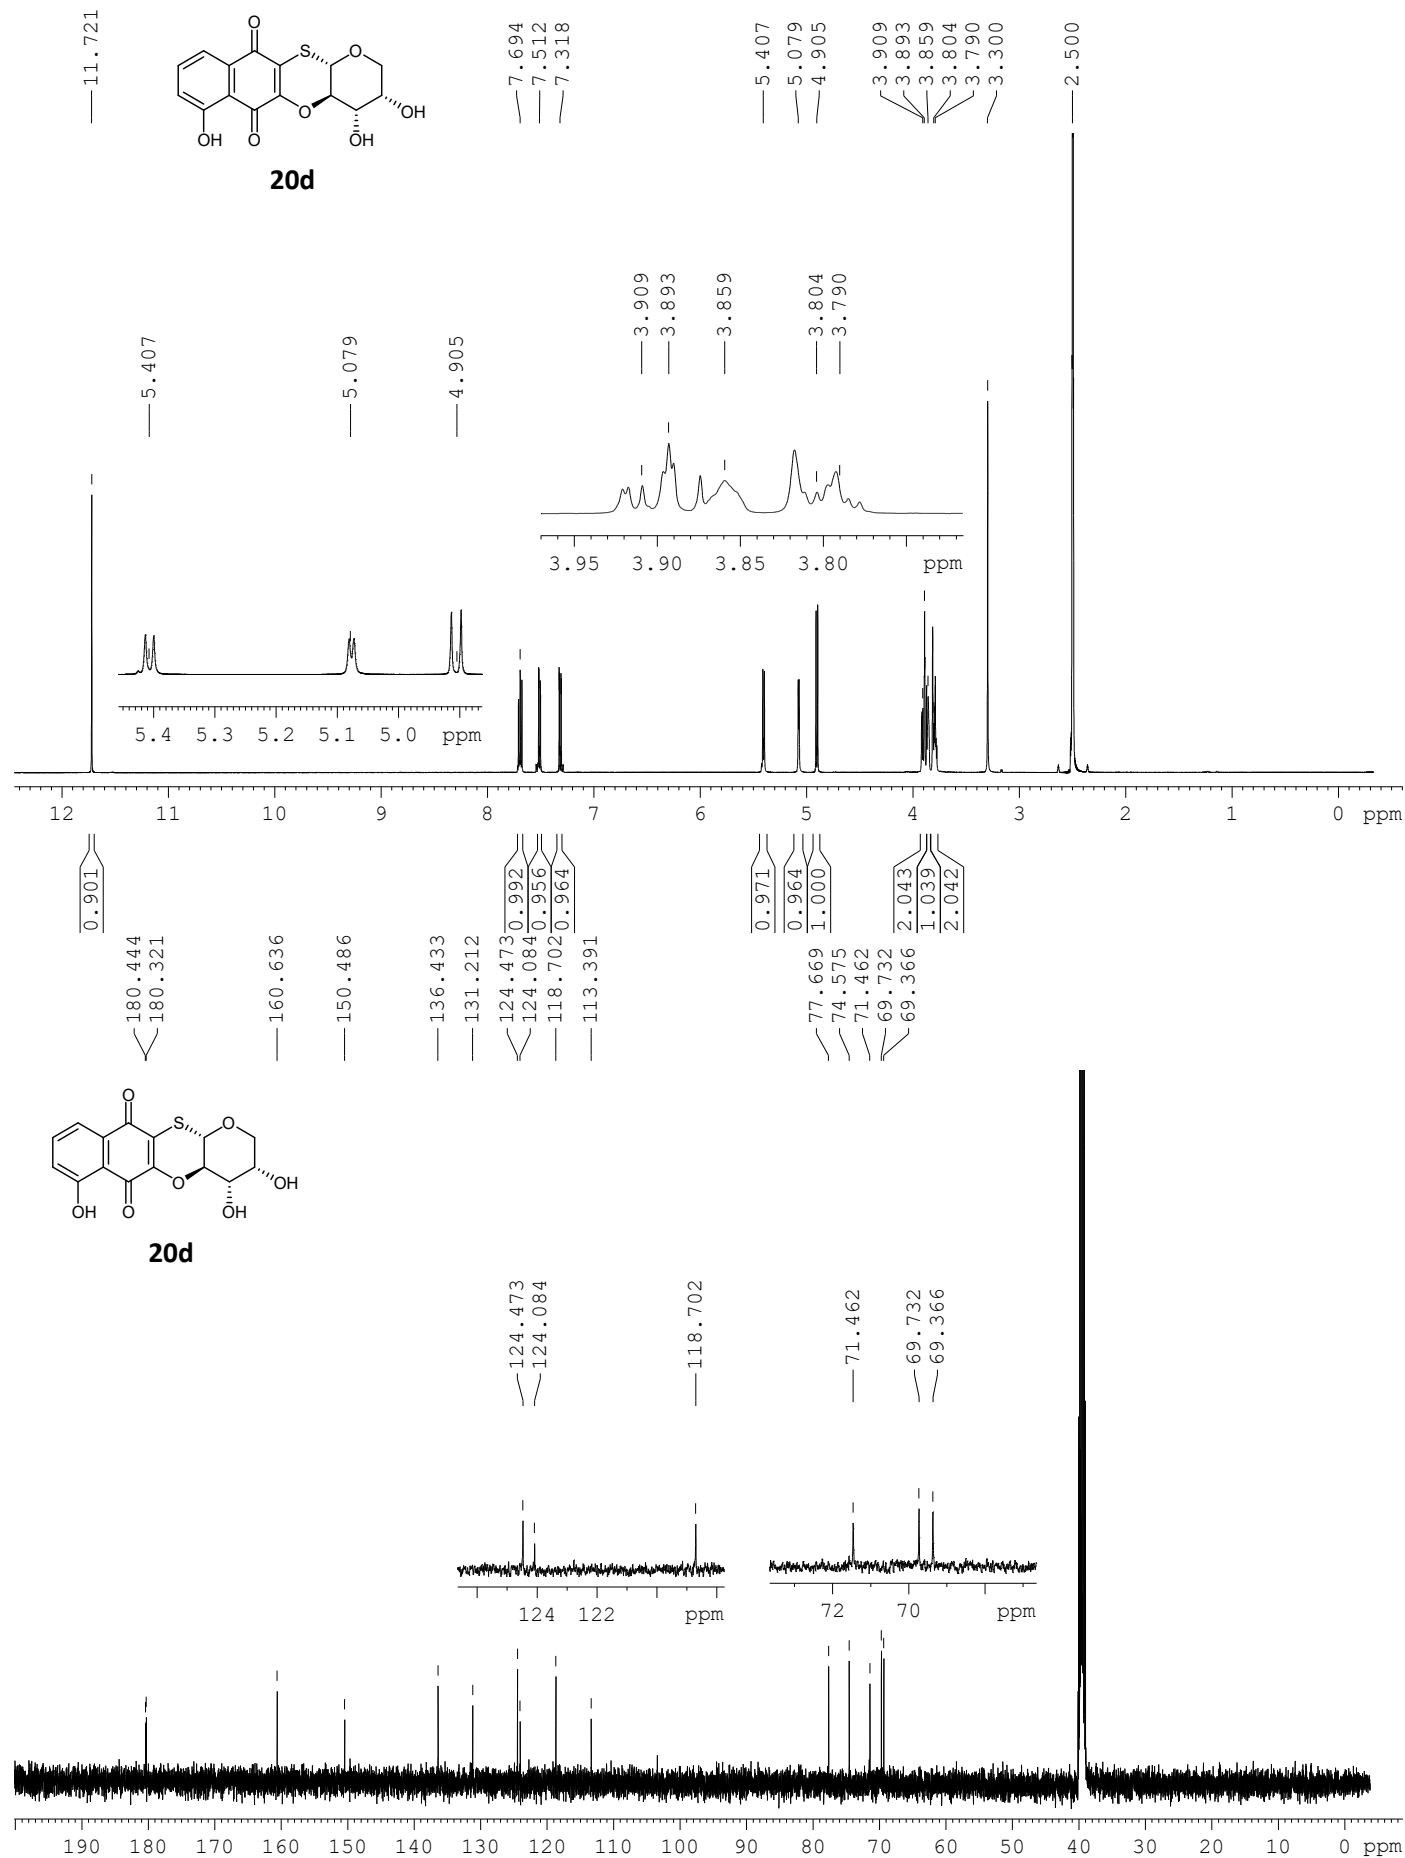

Supplement: molecules-25-03577-s001.pdf [file molecules-25-03577-s001.pdf]
